# Supplementary material for: Paleocene–Eocene age glendonites from the Mid-Norwegian Margin – indicators of cold snaps in the hothouse?
Source: Copernicus journal article supplement (doi:10.5194/cp-20-1-2024), 2024-01-03
Supplement: Supplementary file 1 [file cp-20-1-2024-supplement.zip]

Archive with 3 entries (3 files):
- cp-20-1-2024-supplement-title-page.pdf
- Supplementary_glendonites_396.xlsx
- combined_supplementary_lower_res.pdf
