# Supplementary material for: Paleocene–Eocene age glendonites from the Mid-Norwegian Margin – indicators of cold snaps in the hothouse?
Source: Copernicus journal article supplement (doi:10.5194/cp-20-1-2024), 2024-01-03
Supplement: Supplementary file 1 [file cp-20-1-2024-supplement.zip › combined_supplementary_lower_res.pdf]

## **SUPPLEMENTARY 1**

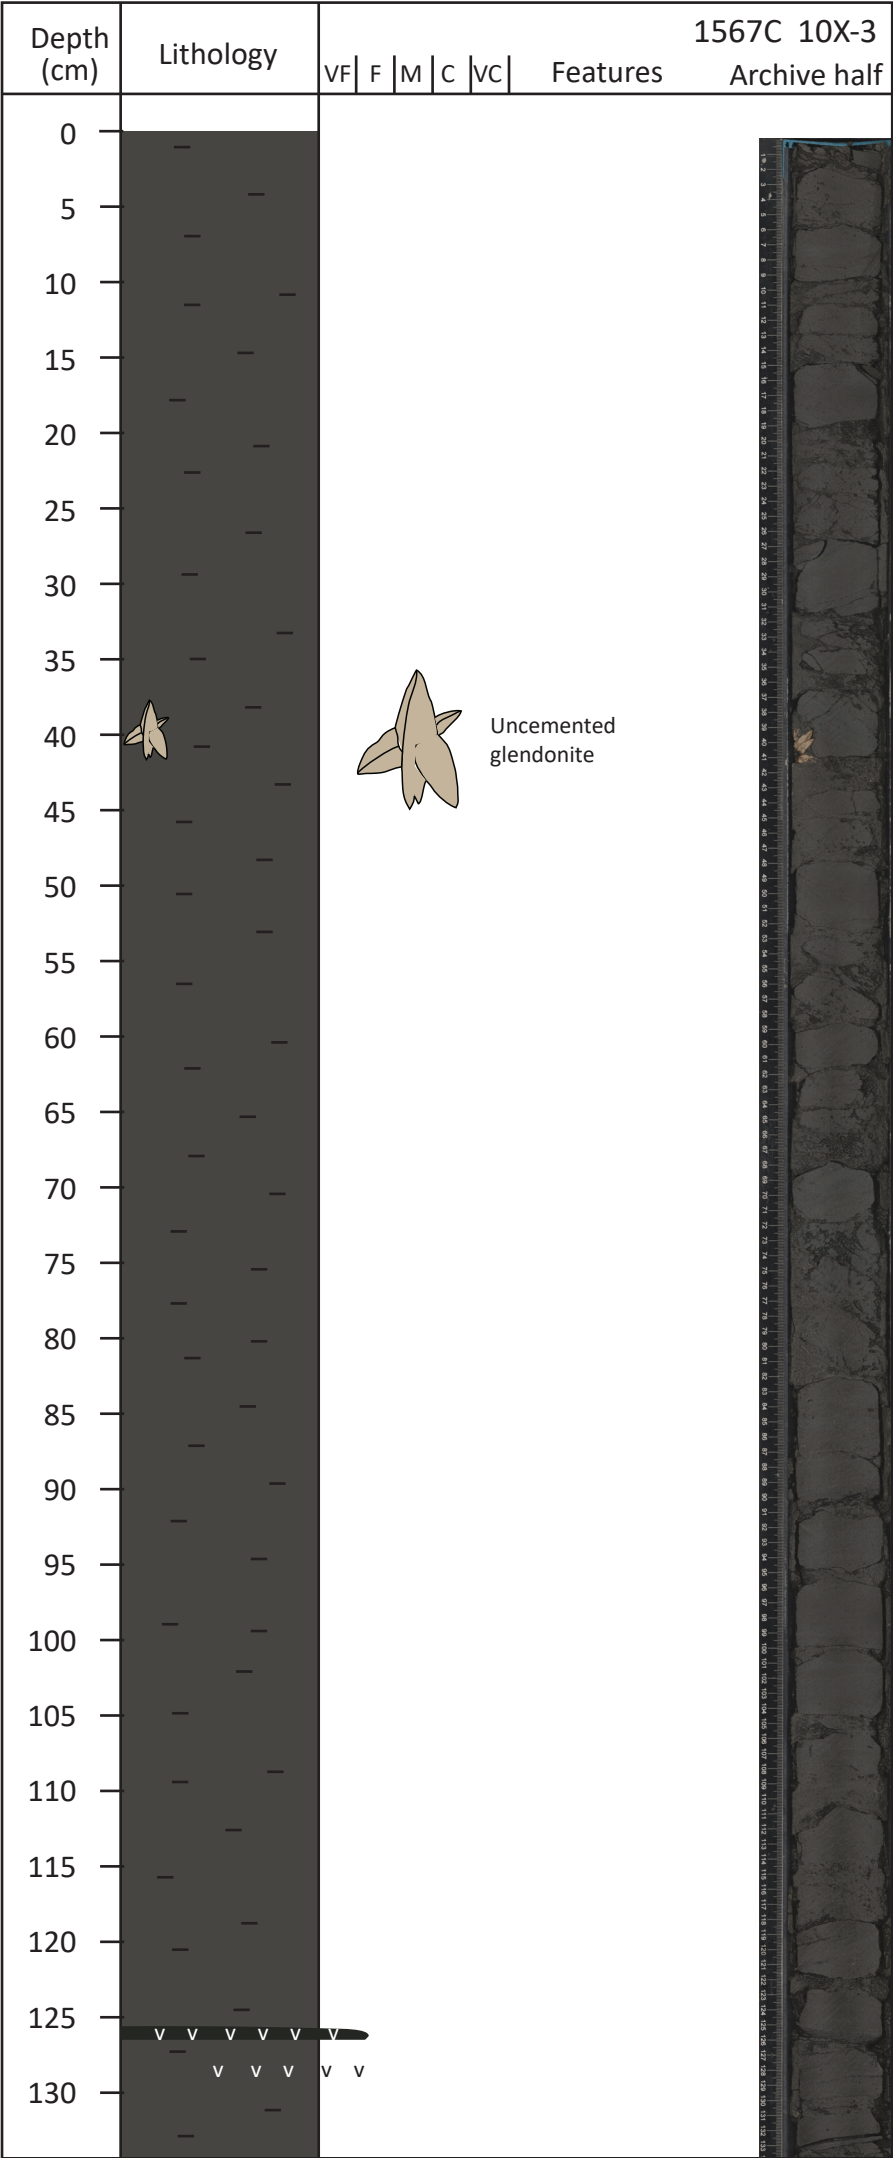

(S1) Fig. S1: High-resolution log of core section U1567C-10X-3.

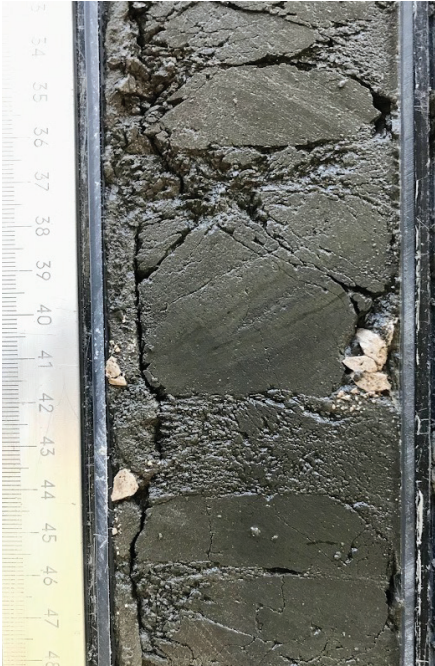

KEY

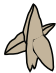

Glendonite

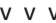

Volcanic ash

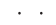

Sand-sized ash grains

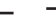

Mud/clay

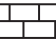

Carbonate

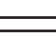

Laminations

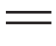

Sub-laminations

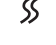

Bioturbation

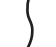

“Water escape structures”  
/stress cracks

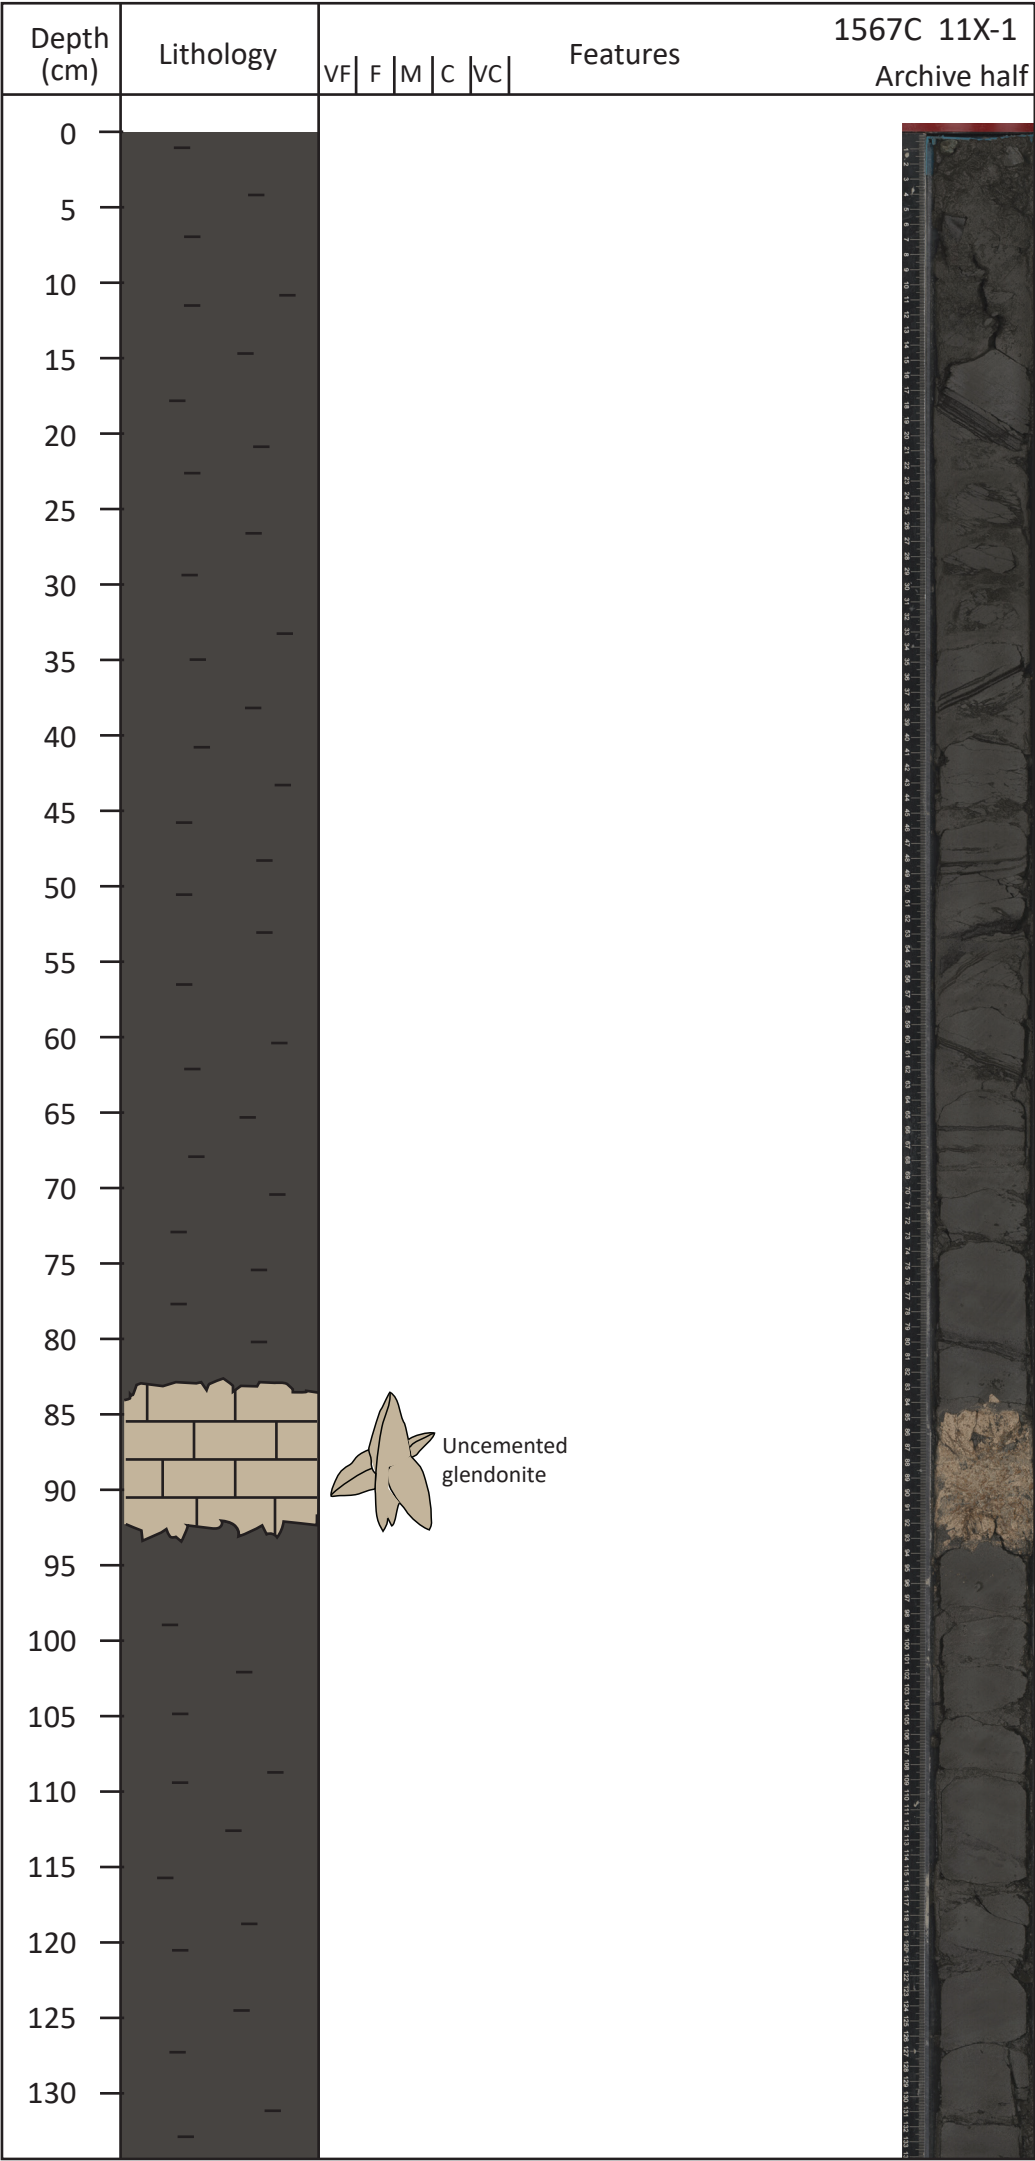

(S1) Fig. S2: High-resolution log of core section U1567C-11X-1.

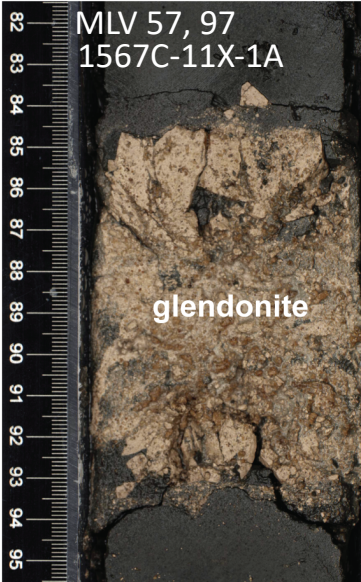

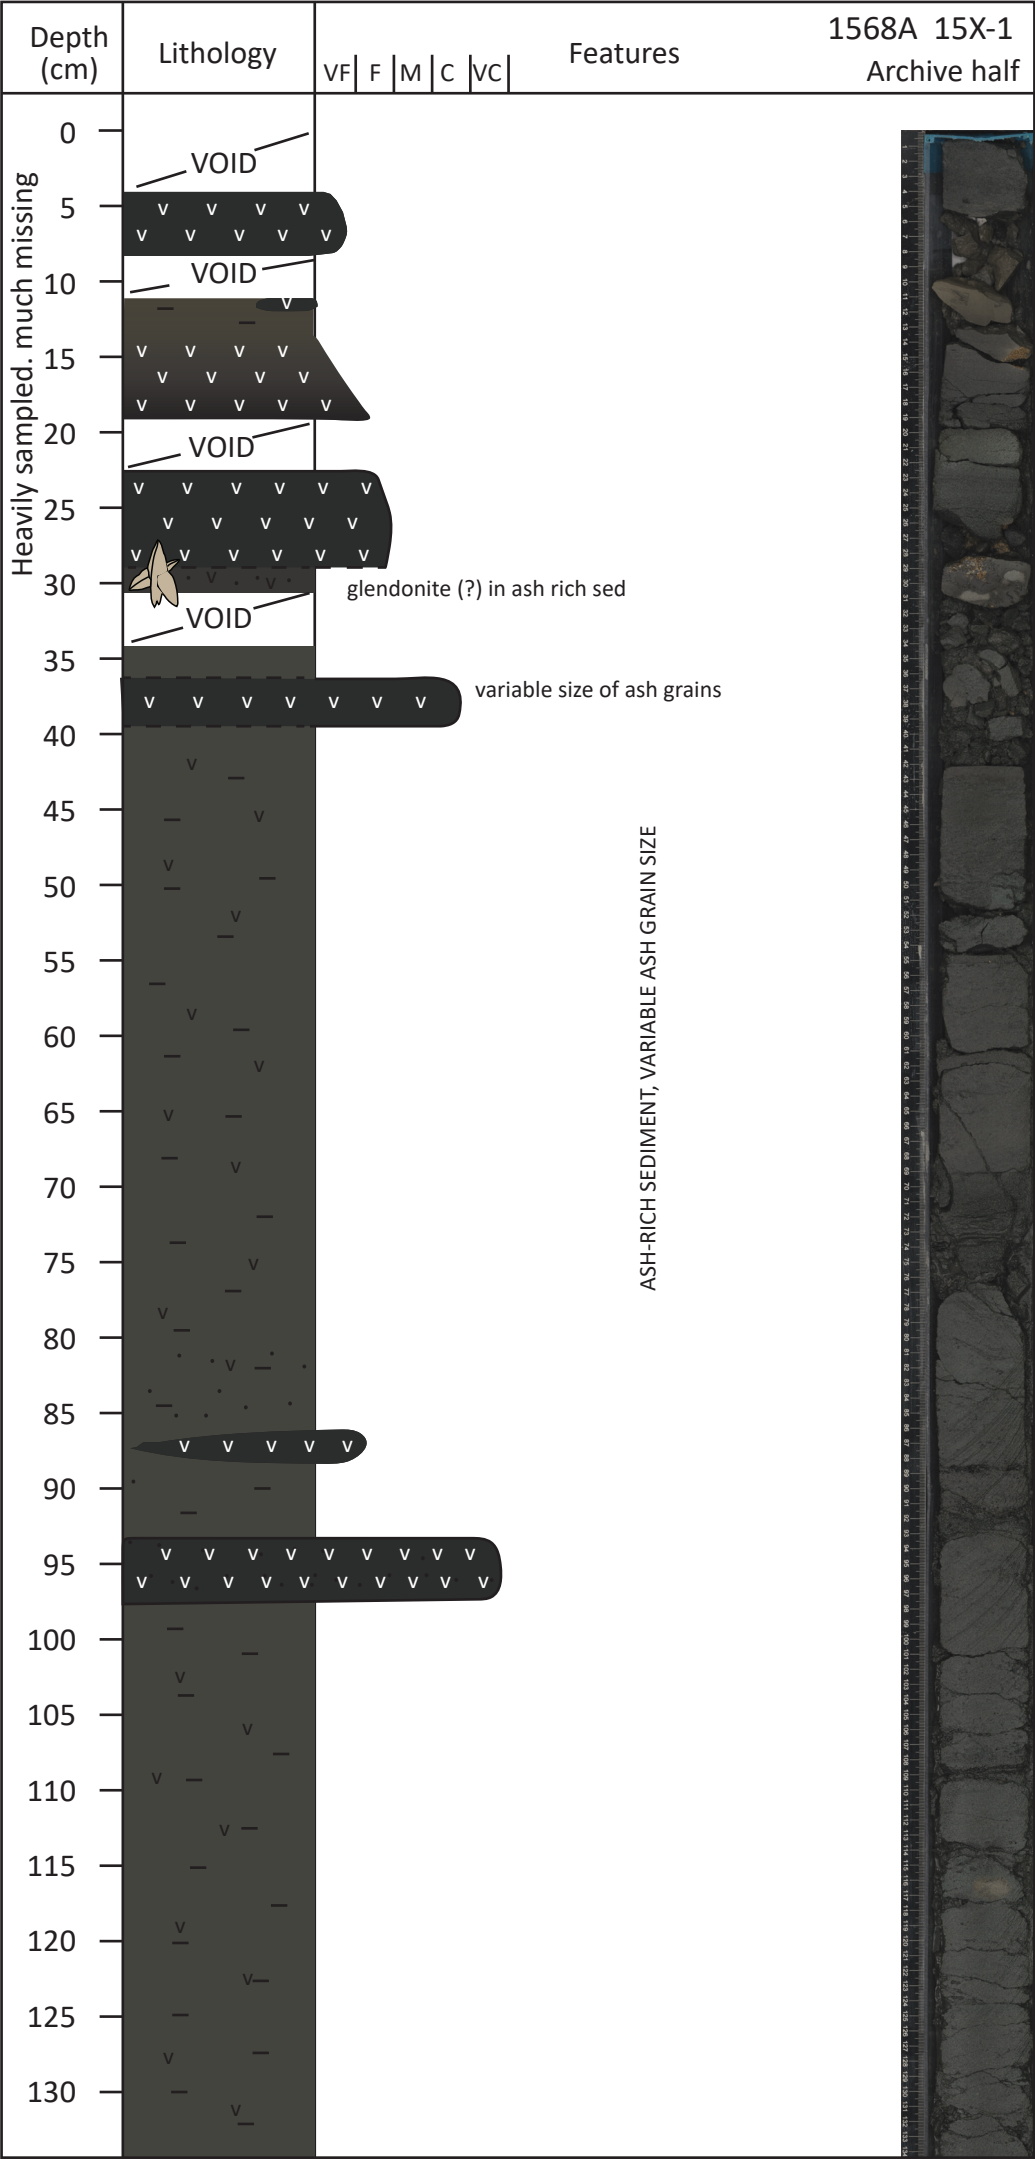

(S1) Fig. S3: High-resolution log of core section U1568A-15X-1.

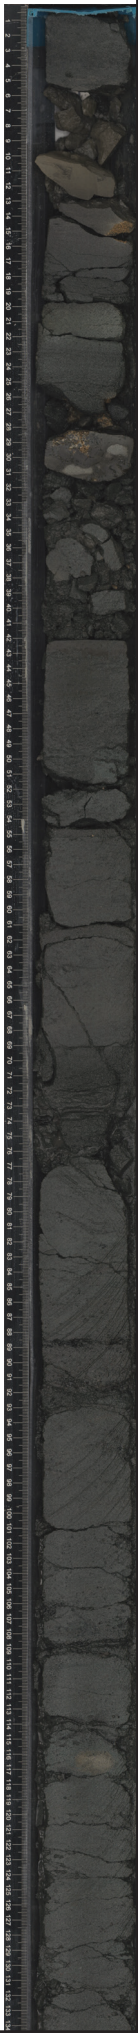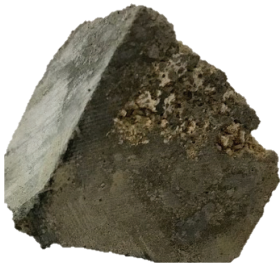

|  | Depth<br>(cm) | Lithology | <div>V F M C VC</div> | Features | Archive half |
|--|---------------|-----------|-----------------------|----------|--------------|
|  | 0             | VOID      |                       |          |              |
|  | 5             |           |                       |          |              |
|  | 10            | VOID      |                       |          |              |
|  | 15            |           | v v v v               |          |              |
|  | 20            |           |                       |          |              |
|  | 25            |           |                       |          |              |
|  | 30            |           |                       |          |              |
|  | 35            |           |                       |          |              |
|  | 40            |           |                       |          |              |
|  | 45            |           |                       |          |              |
|  | 50            |           |                       |          |              |
|  | 55            |           |                       |          |              |
|  | 60            |           |                       |          |              |
|  | 65            |           |                       |          |              |
|  | 70            |           |                       |          |              |
|  | 75            |           |                       |          |              |
|  | 80            |           |                       |          |              |
|  | 85            |           |                       |          |              |
|  | 90            |           |                       |          |              |
|  | 95            |           |                       |          |              |
|  | 100           |           |                       |          |              |
|  | 105           |           |                       |          |              |
|  | 110           |           |                       |          |              |
|  | 115           |           |                       |          |              |
|  | 120           |           |                       |          |              |
|  | 125           |           |                       |          |              |
|  | 130           |           |                       |          |              |

**(S1) Fig. S4:** High-resolution log of core section U1568A-15X-4.

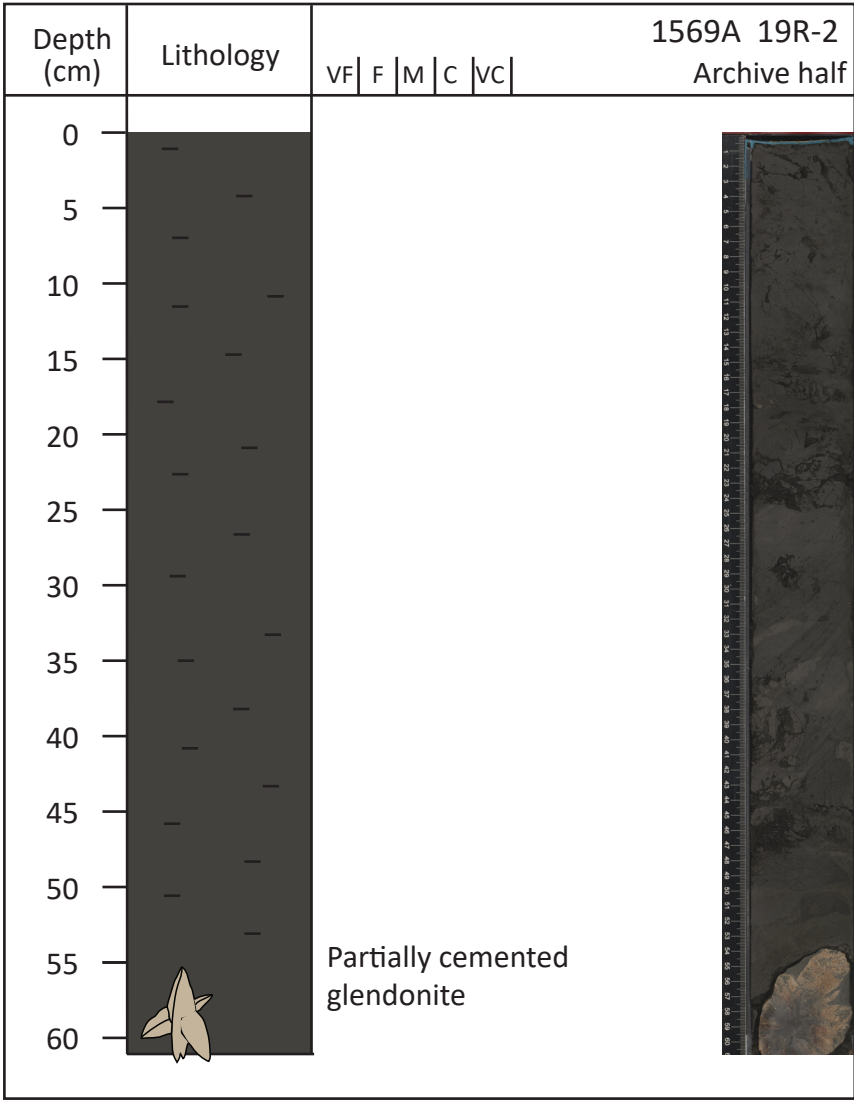

(S1) Fig. S5: High-resolution log of core section U1569A-19R-2.

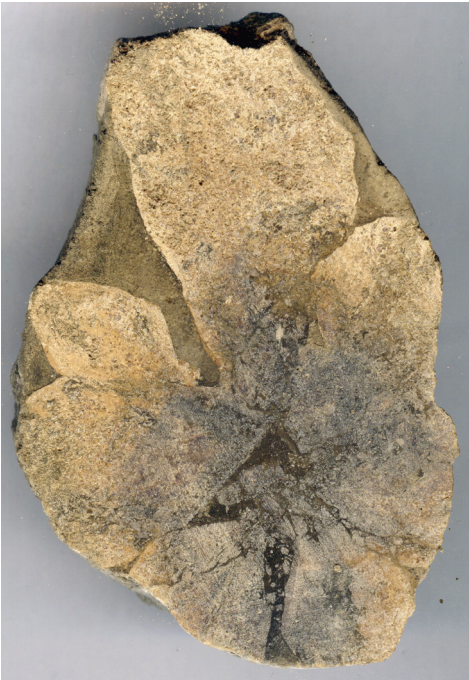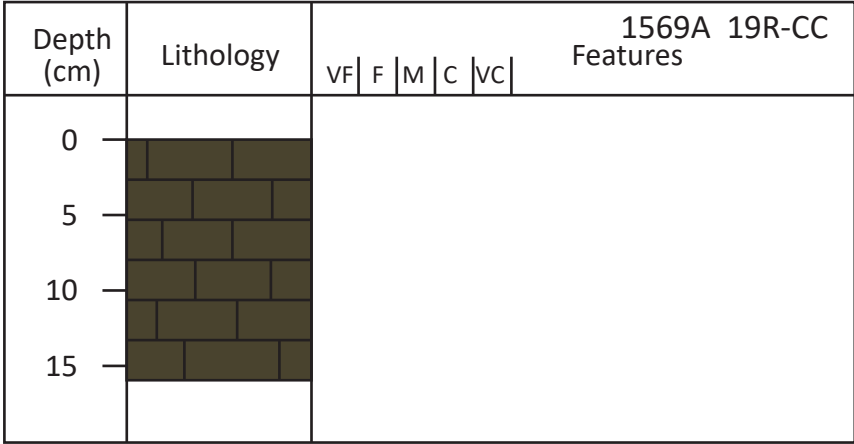

(S1) Fig. S6: High-resolution log of core section U1569A-19R-CC.

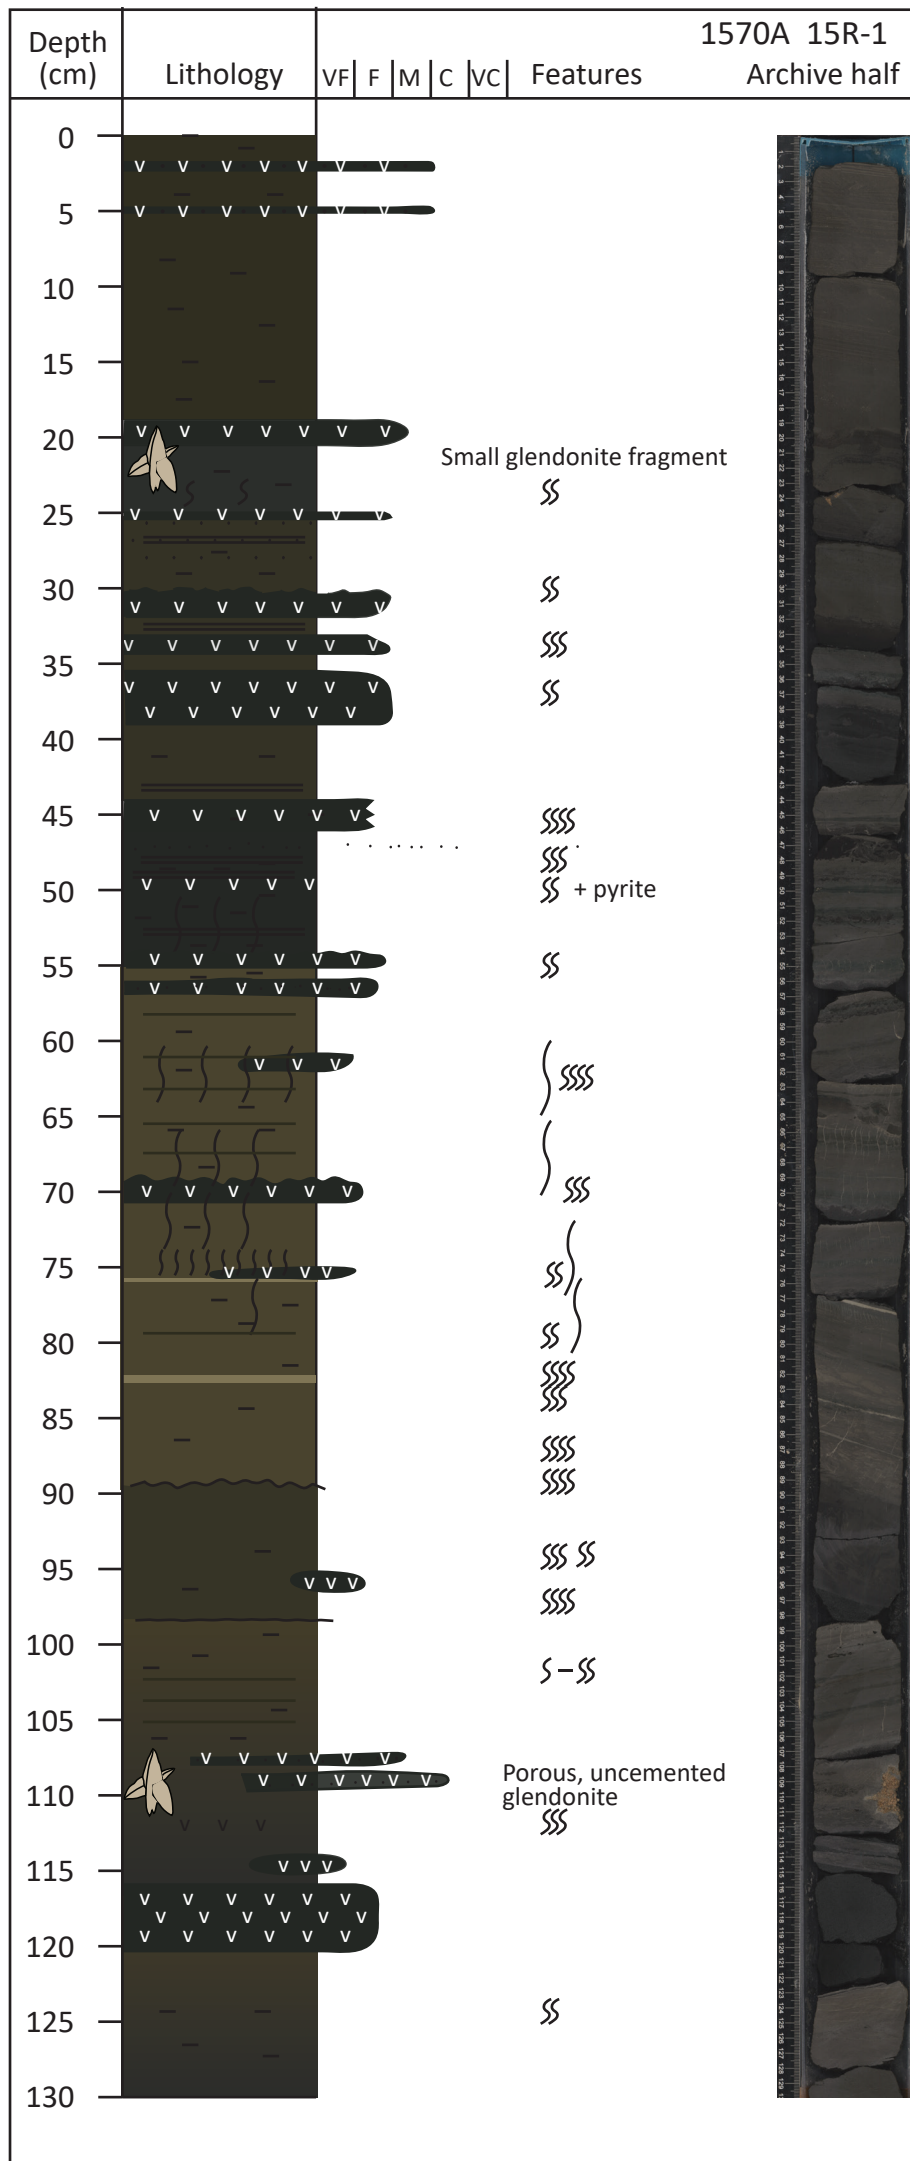

**(S1) Fig. S7:** High-resolution log of core section U1570A-15R-1.

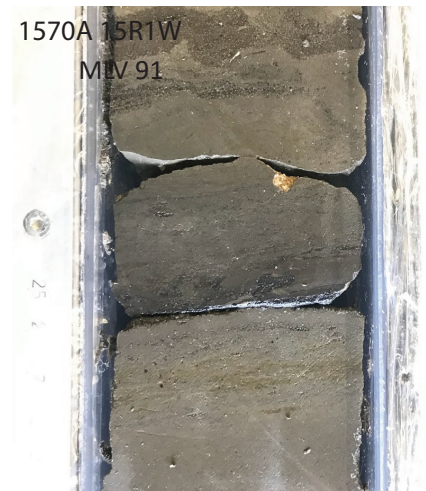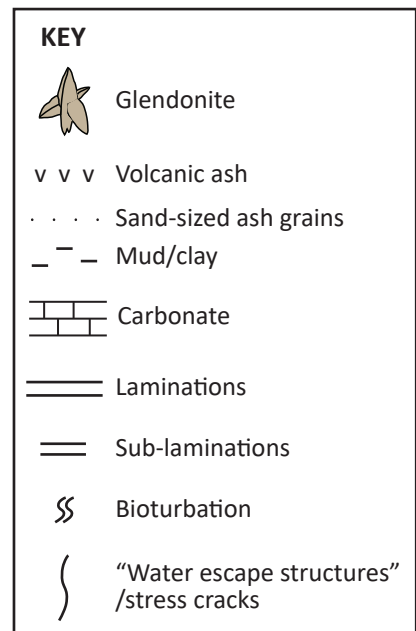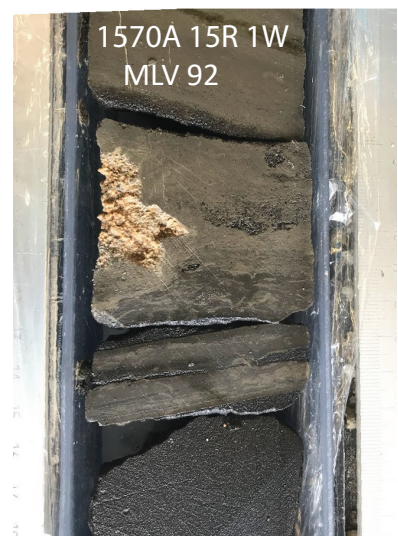

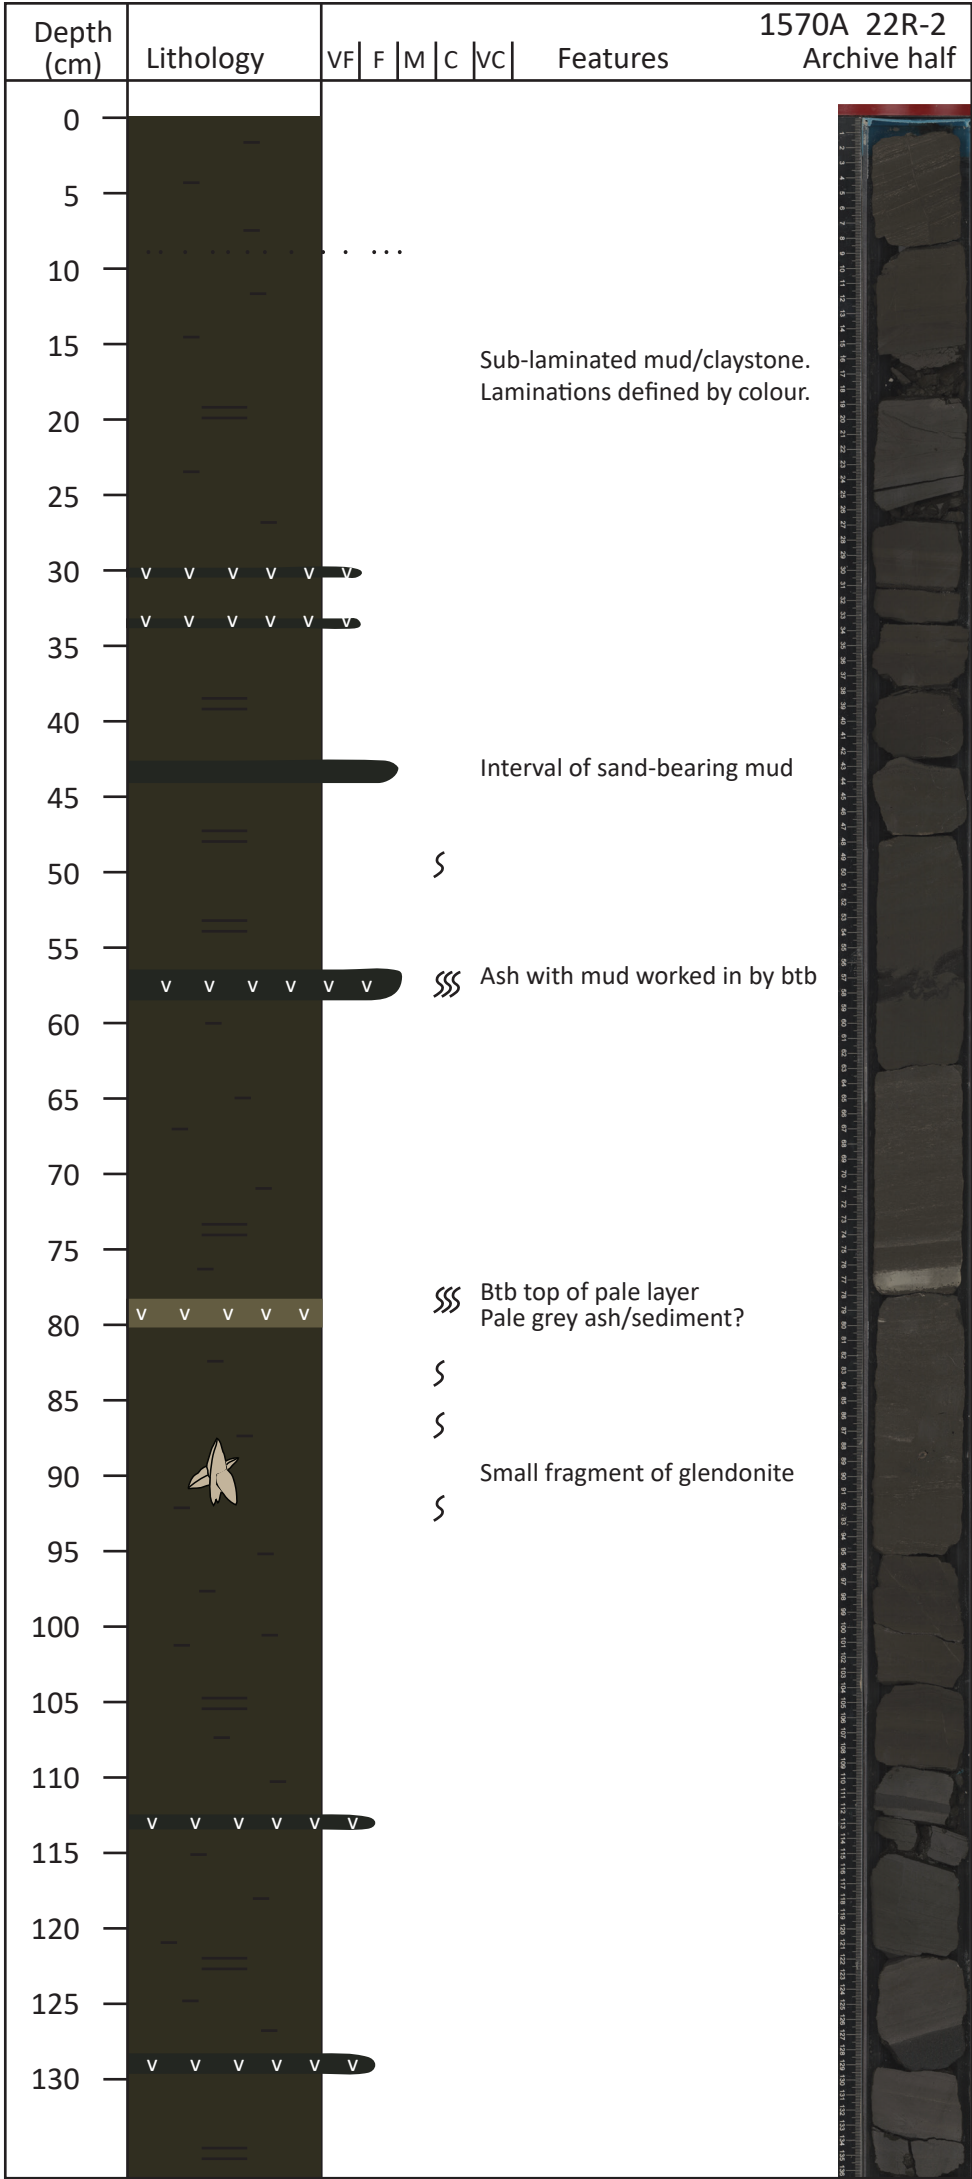

S1 Fig. S8: High-resolution log of core-section U1570A-22R-2

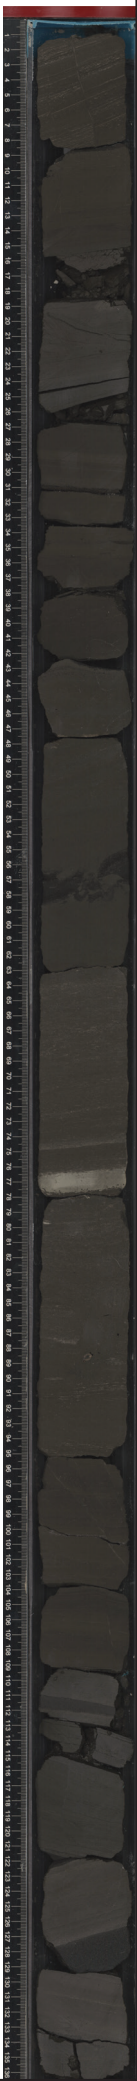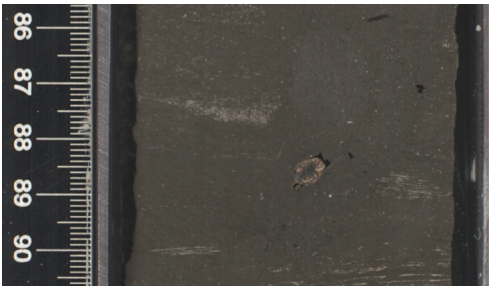

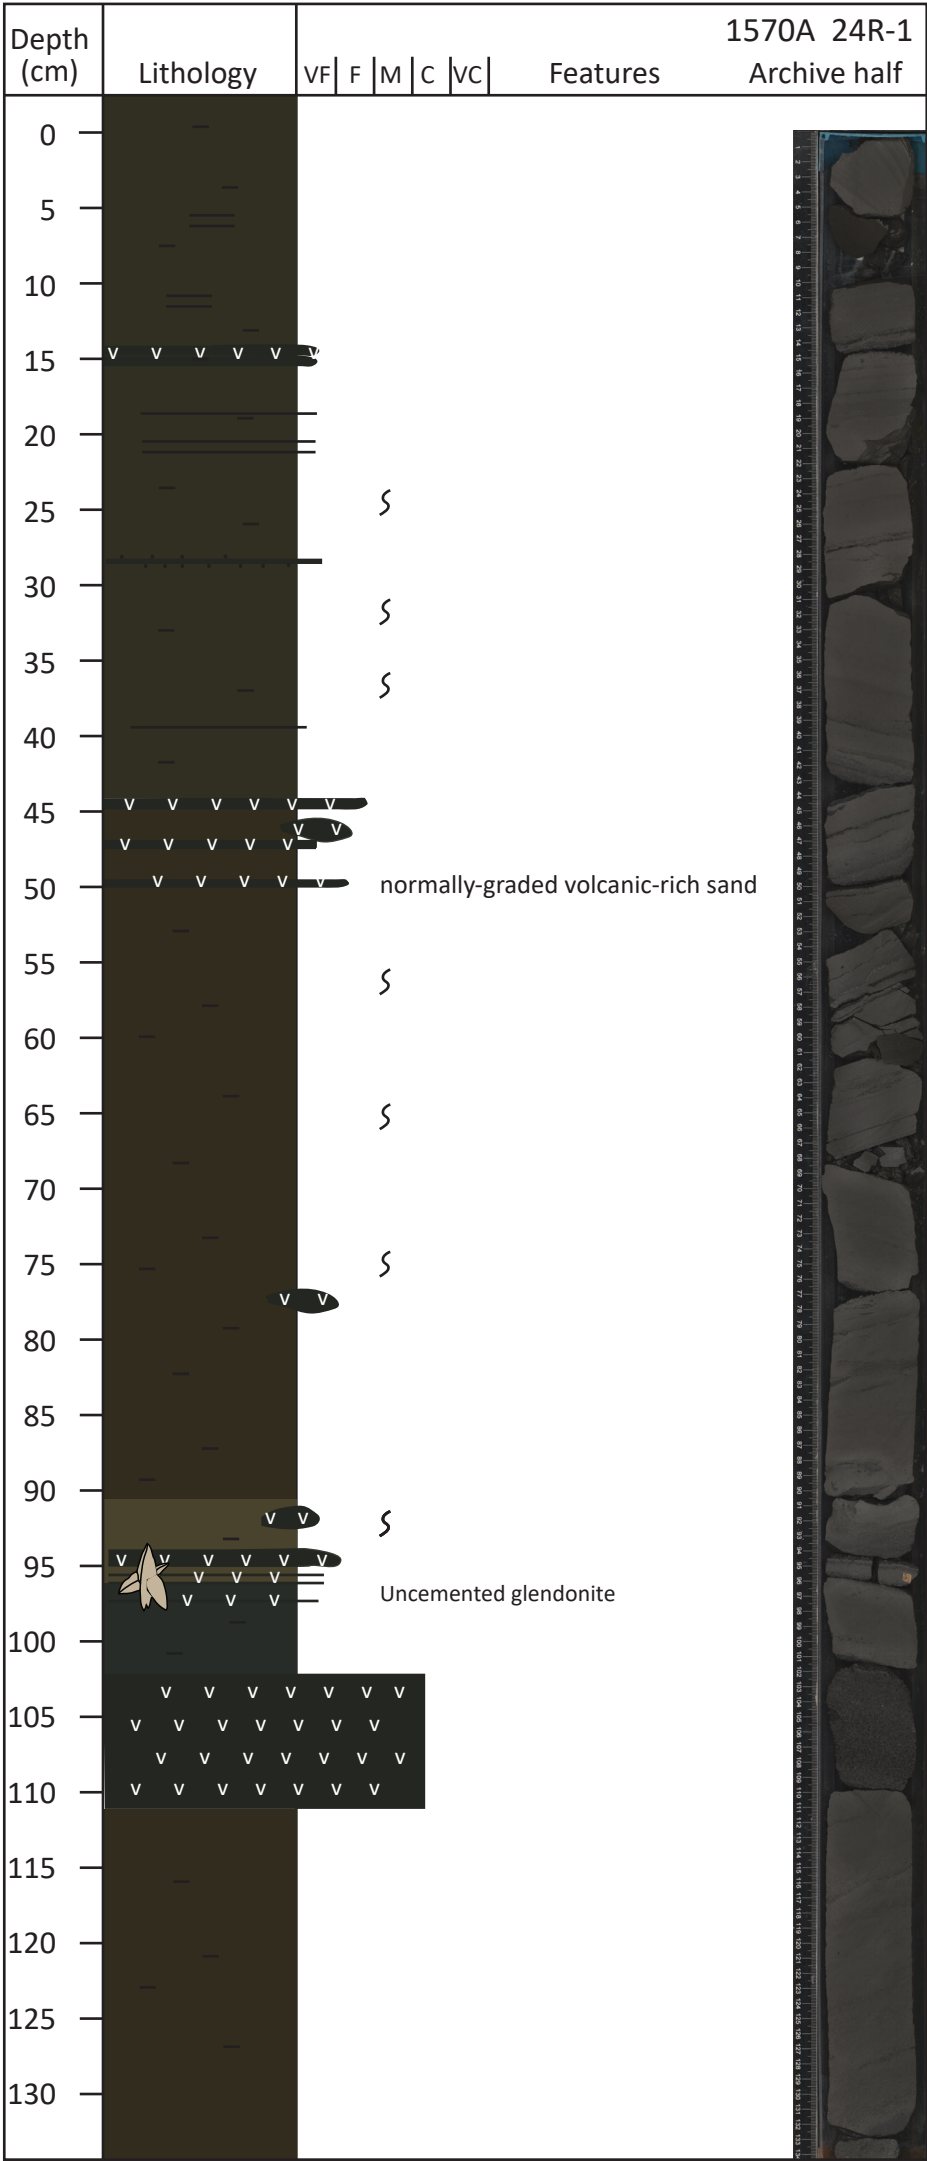

S1: Fig. S9: High-resolution log of core section U1570A-24R-1.

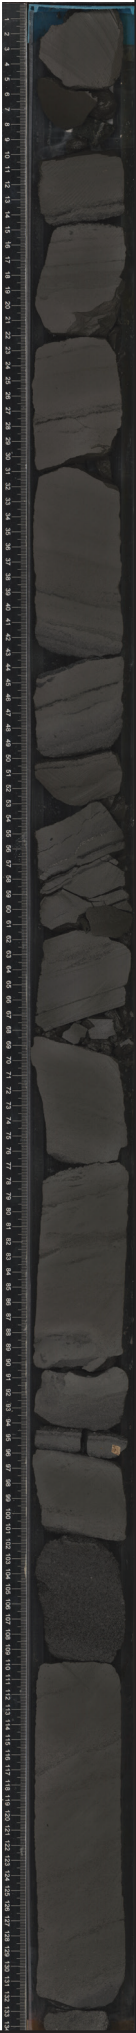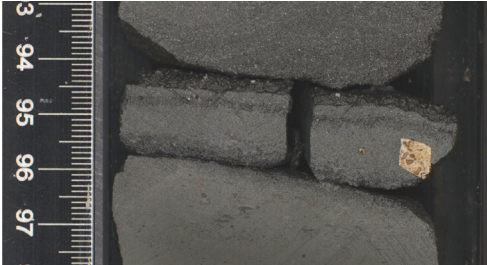

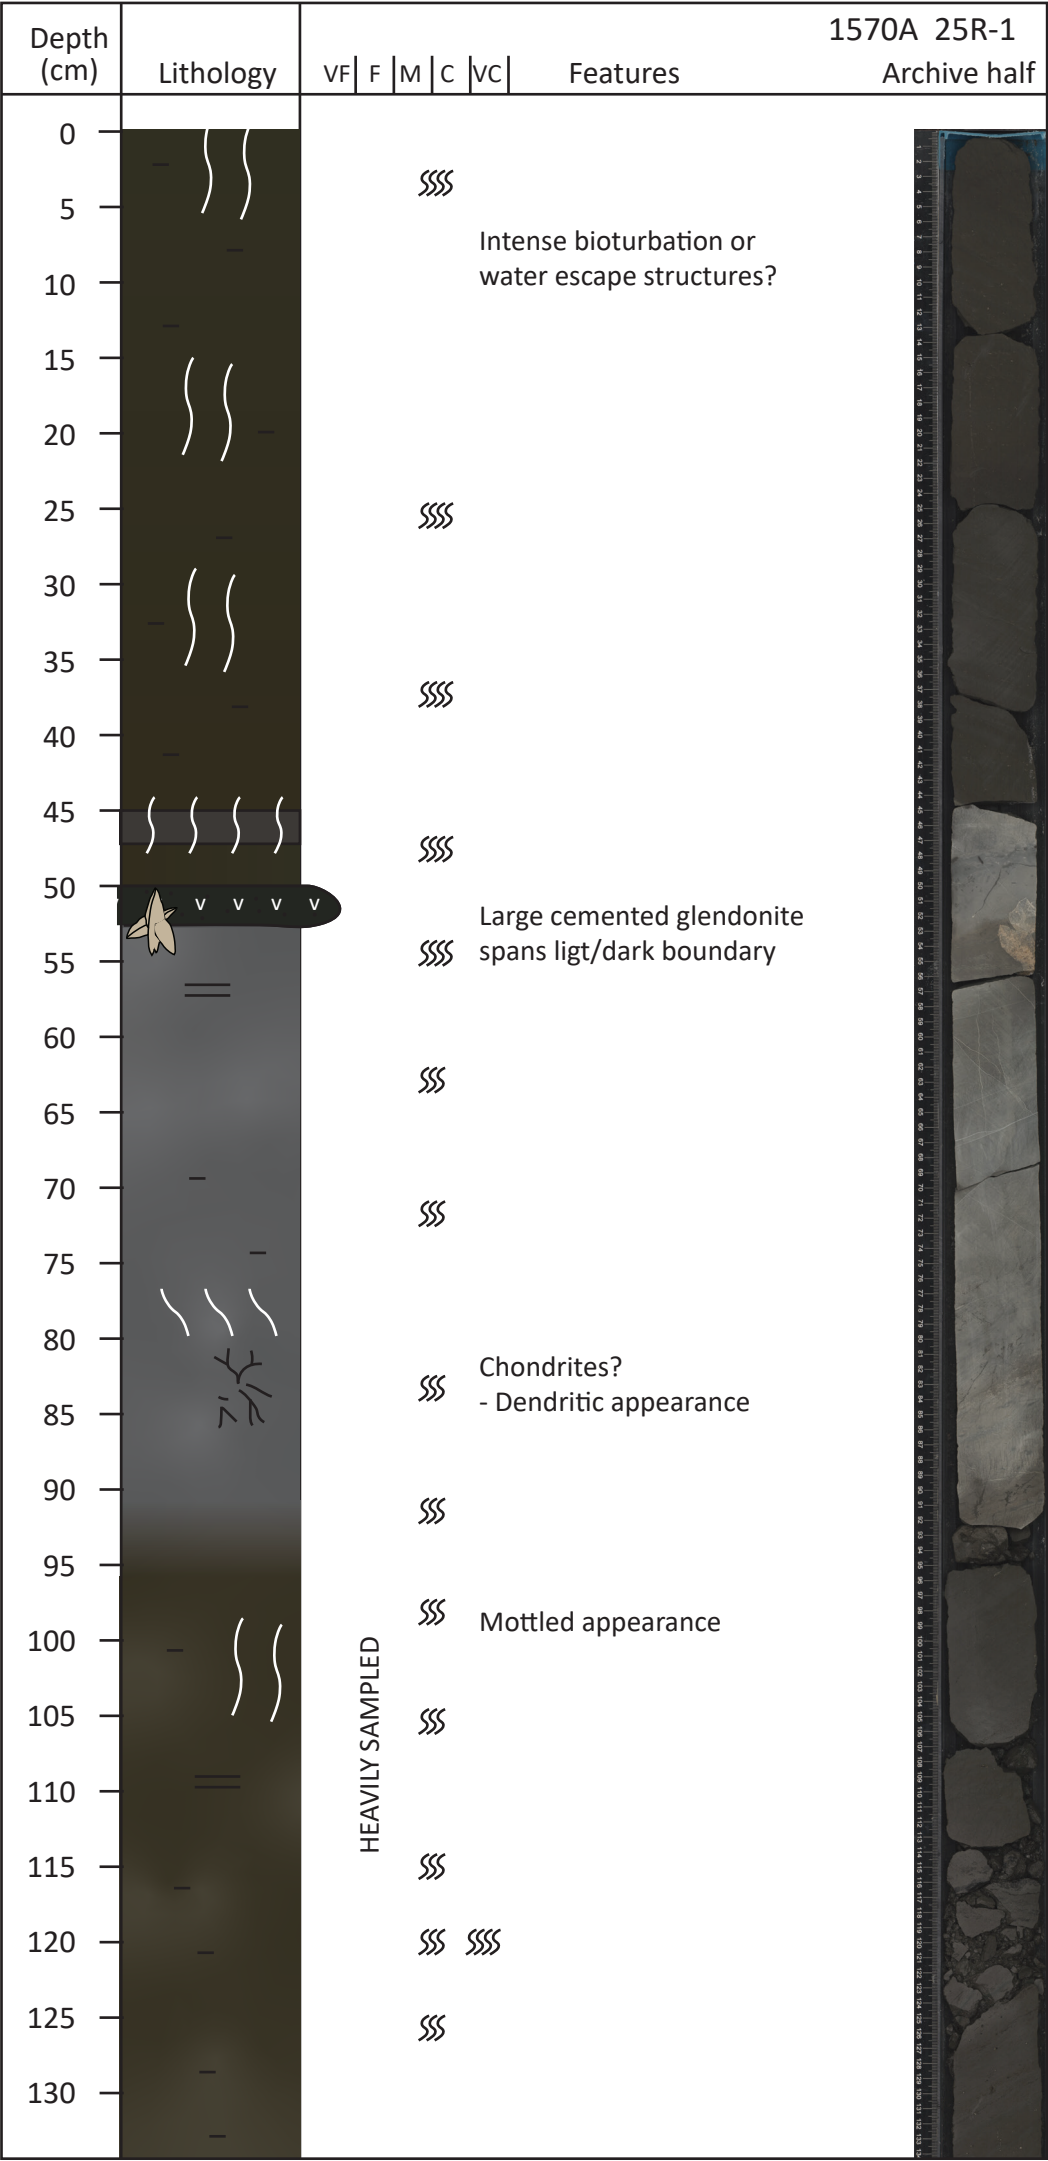

S1 Fig. S10: High resolution log of core-section U1570A-25R-1.

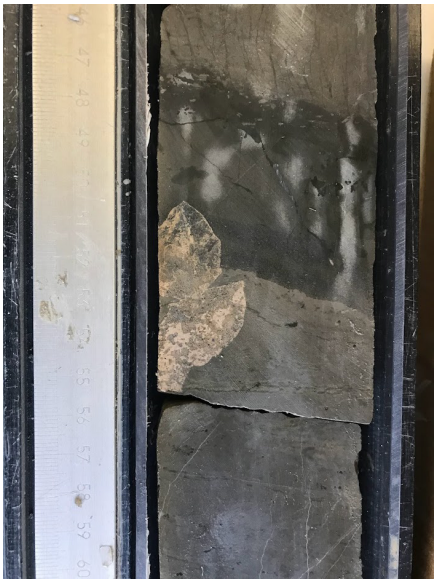

# SUPPLEMENTARY 1

**(S2) Fig. S2.1:** Powder X-Ray diffraction patterns for powdered bulk glendonite samples

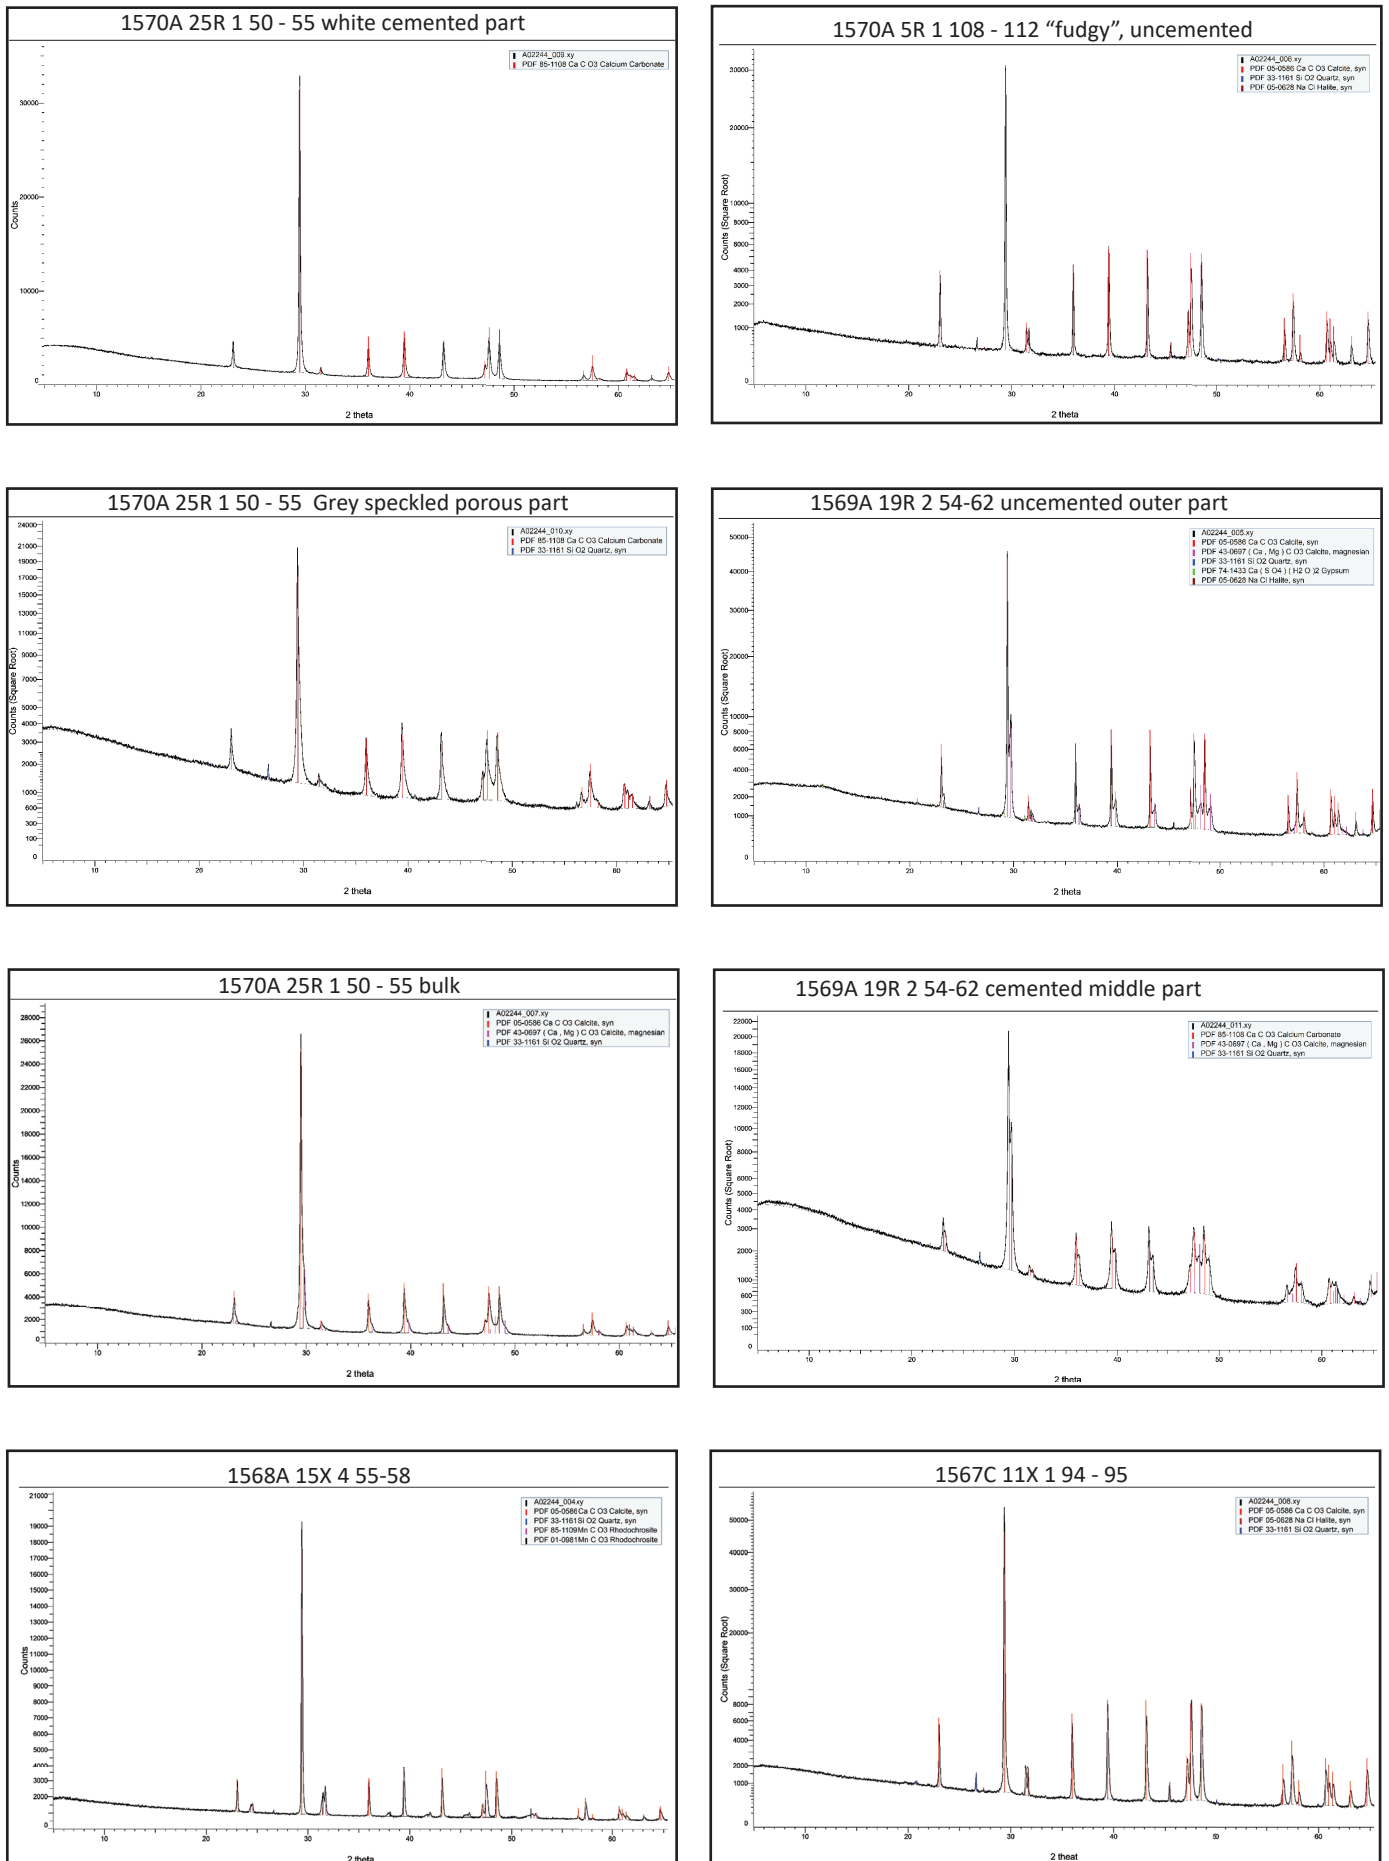

# SUPPLEMENTARY 3

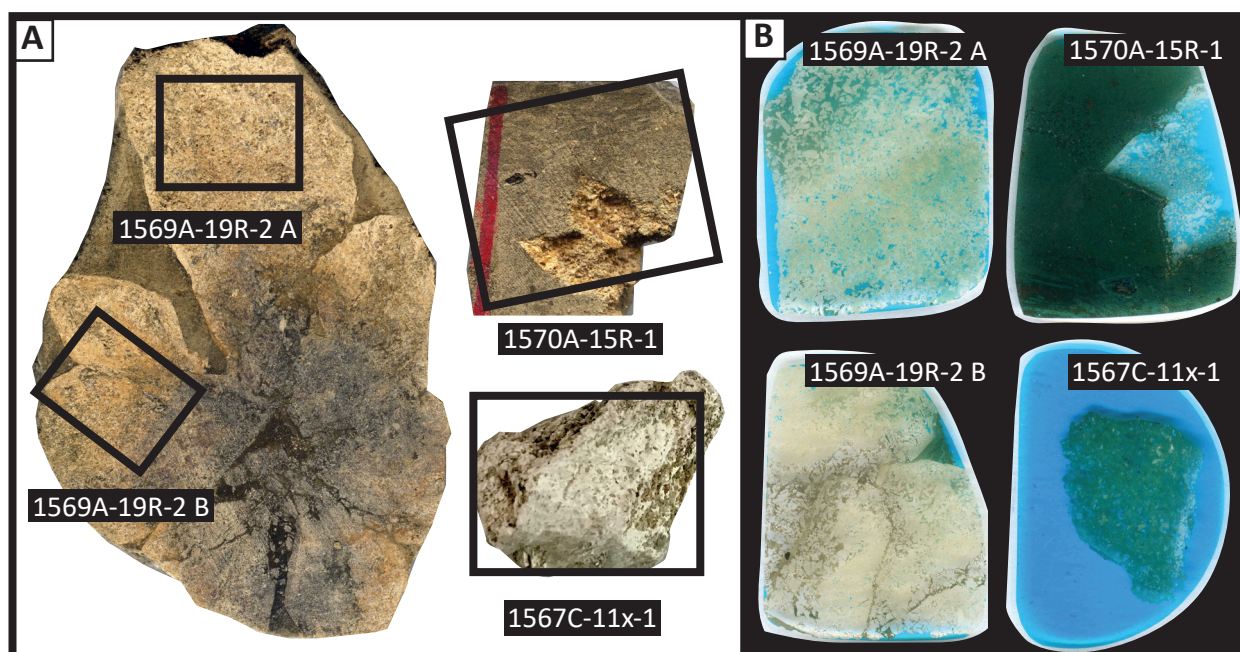

**(S3) Fig. S3.1: (A)** Overview of where thin sections were made from 3 selected glendonites. **(B)** Scans of the entire thin sections.

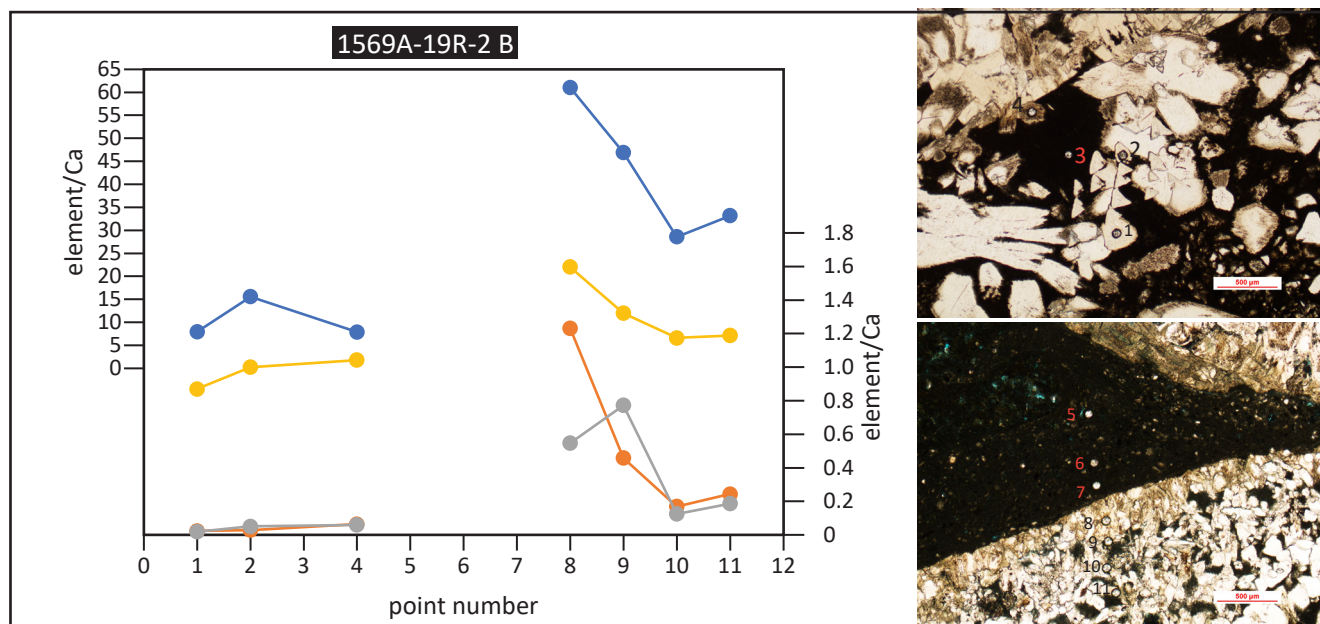

**(S3) Fig. S3.2: (Left)** Element/Ca profiles measured by LA-ICPMS across two areas of thin section B of the glendonite from U1569A-19R-2. **(Right)** Photomicrographs of the areas analysed, with labelled sample points, under plane polarised light.

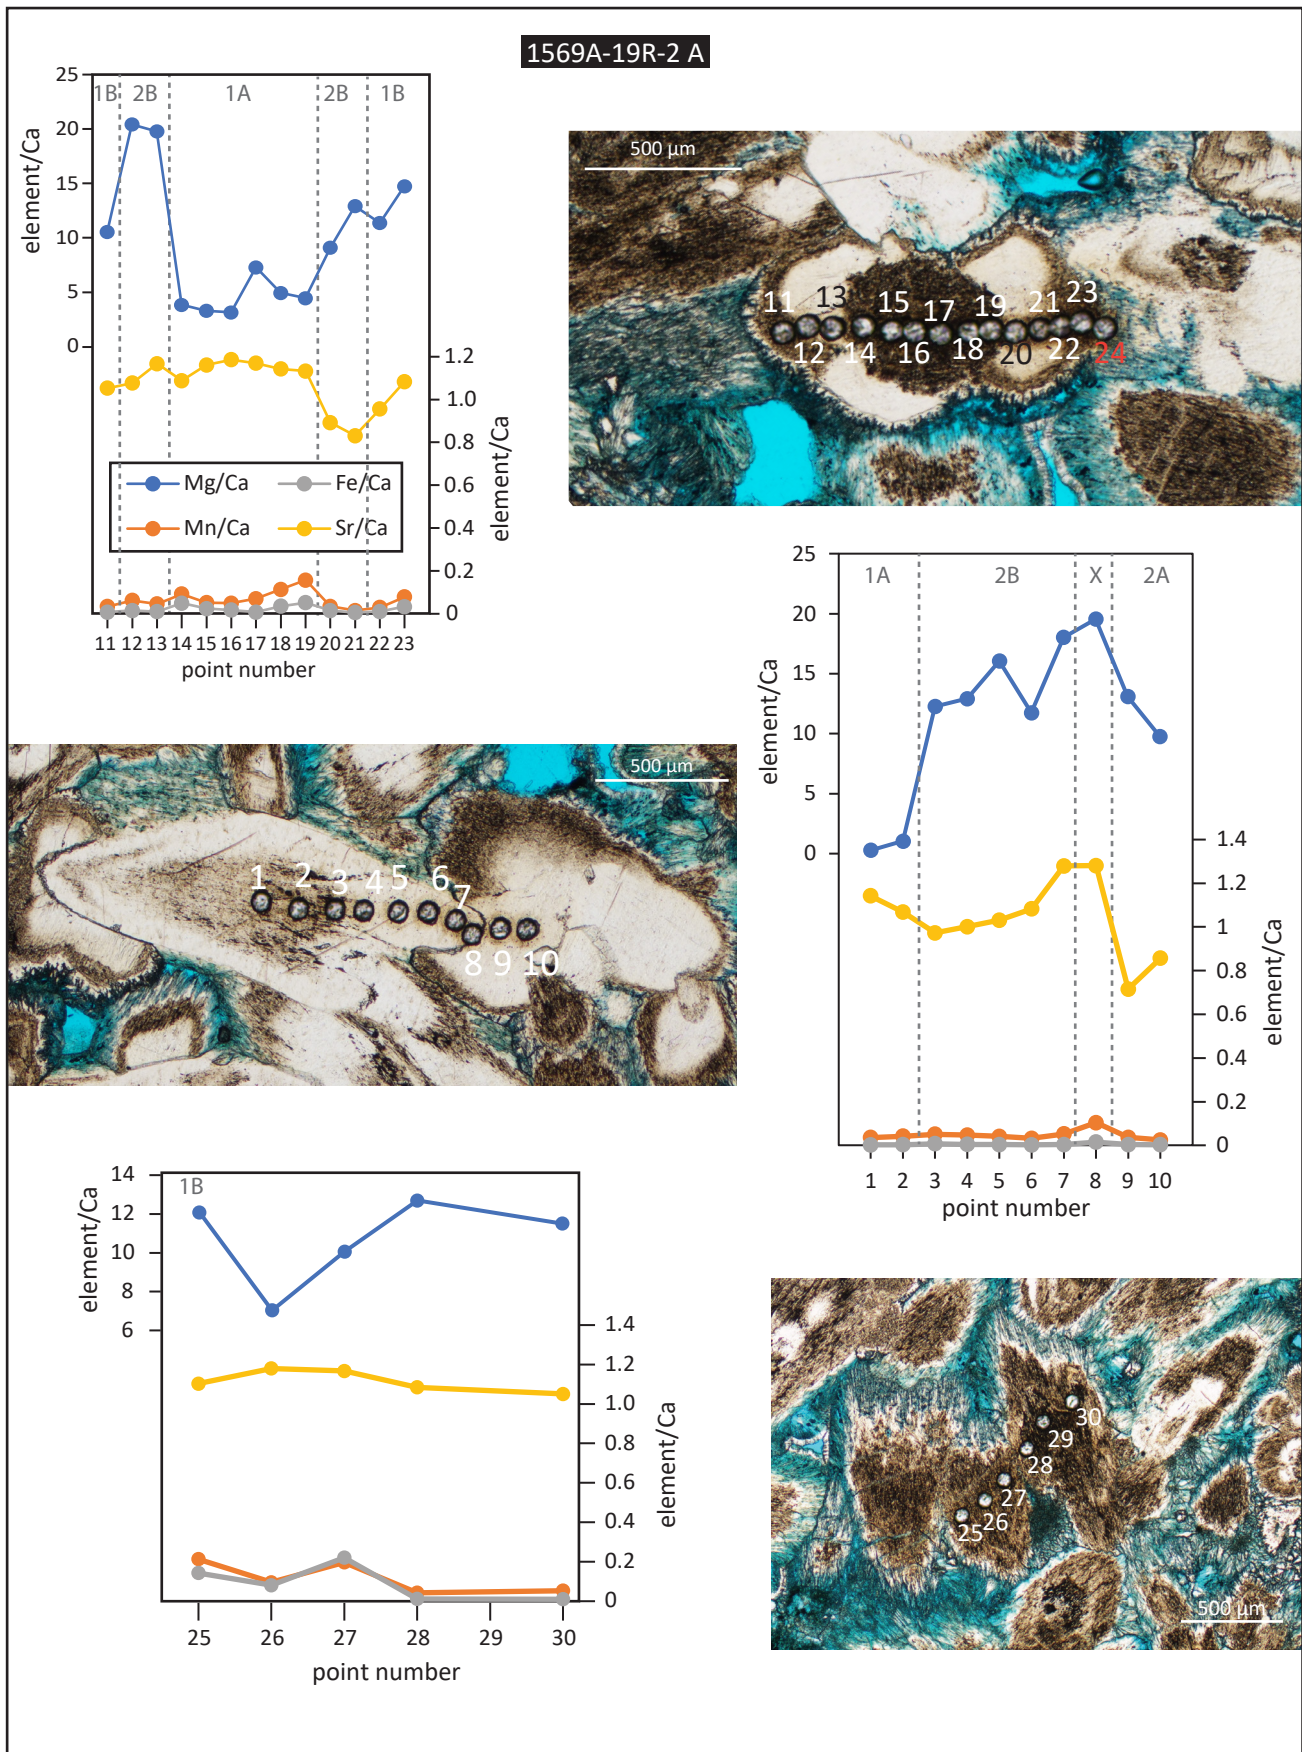

**(S3) Fig. S3.3:** Element/Ca profiles measured by LA-ICPMS across areas of thin section A of the glendonite from U1569A-19R-2, shown next to photomicrographs of the sections with labelled sample points, under plane polarised light.

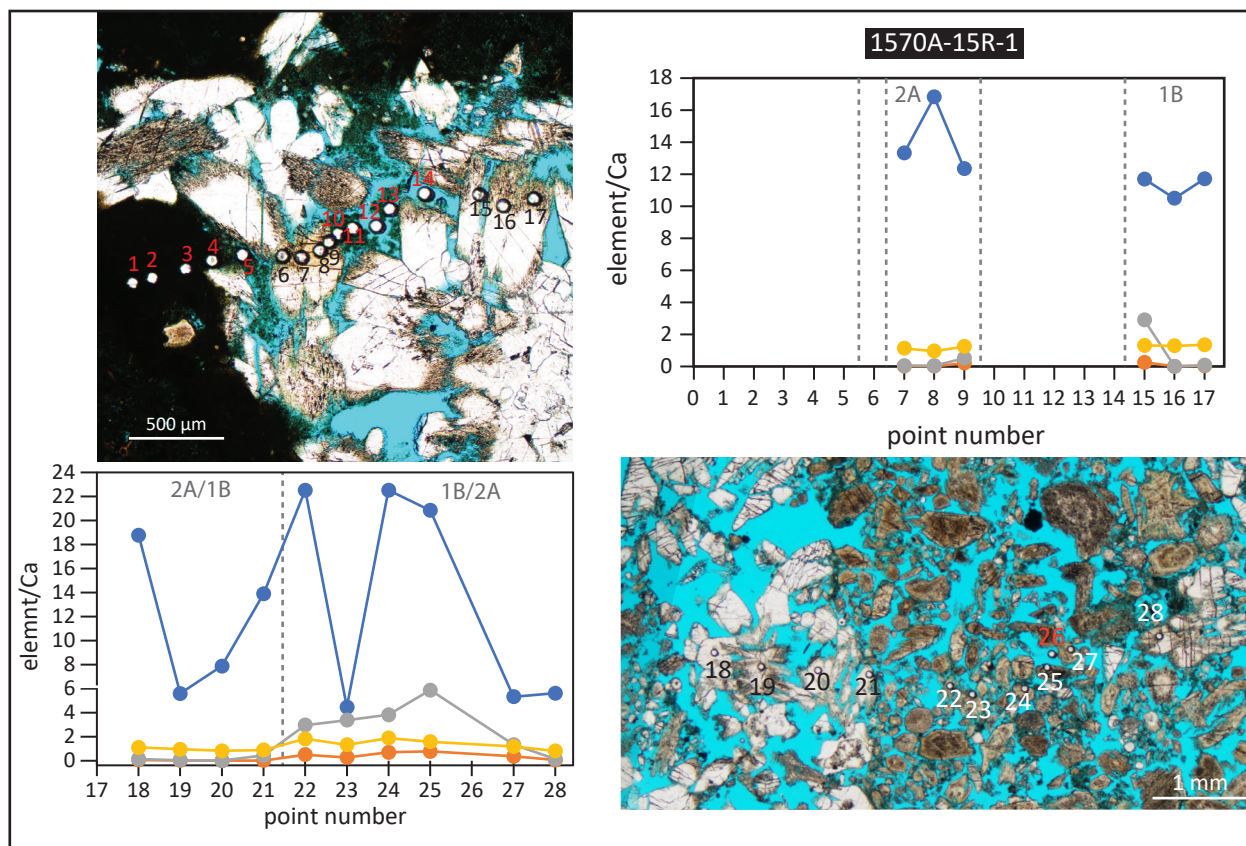

**(S3) Fig. S3.4:** Element/Ca profiles measured by LA-ICPMS across two areas of thin section of the glendonite from U1570A-15R-1, shown next to photomicrographs of the sections with labelled sample points, under plane polarised light.

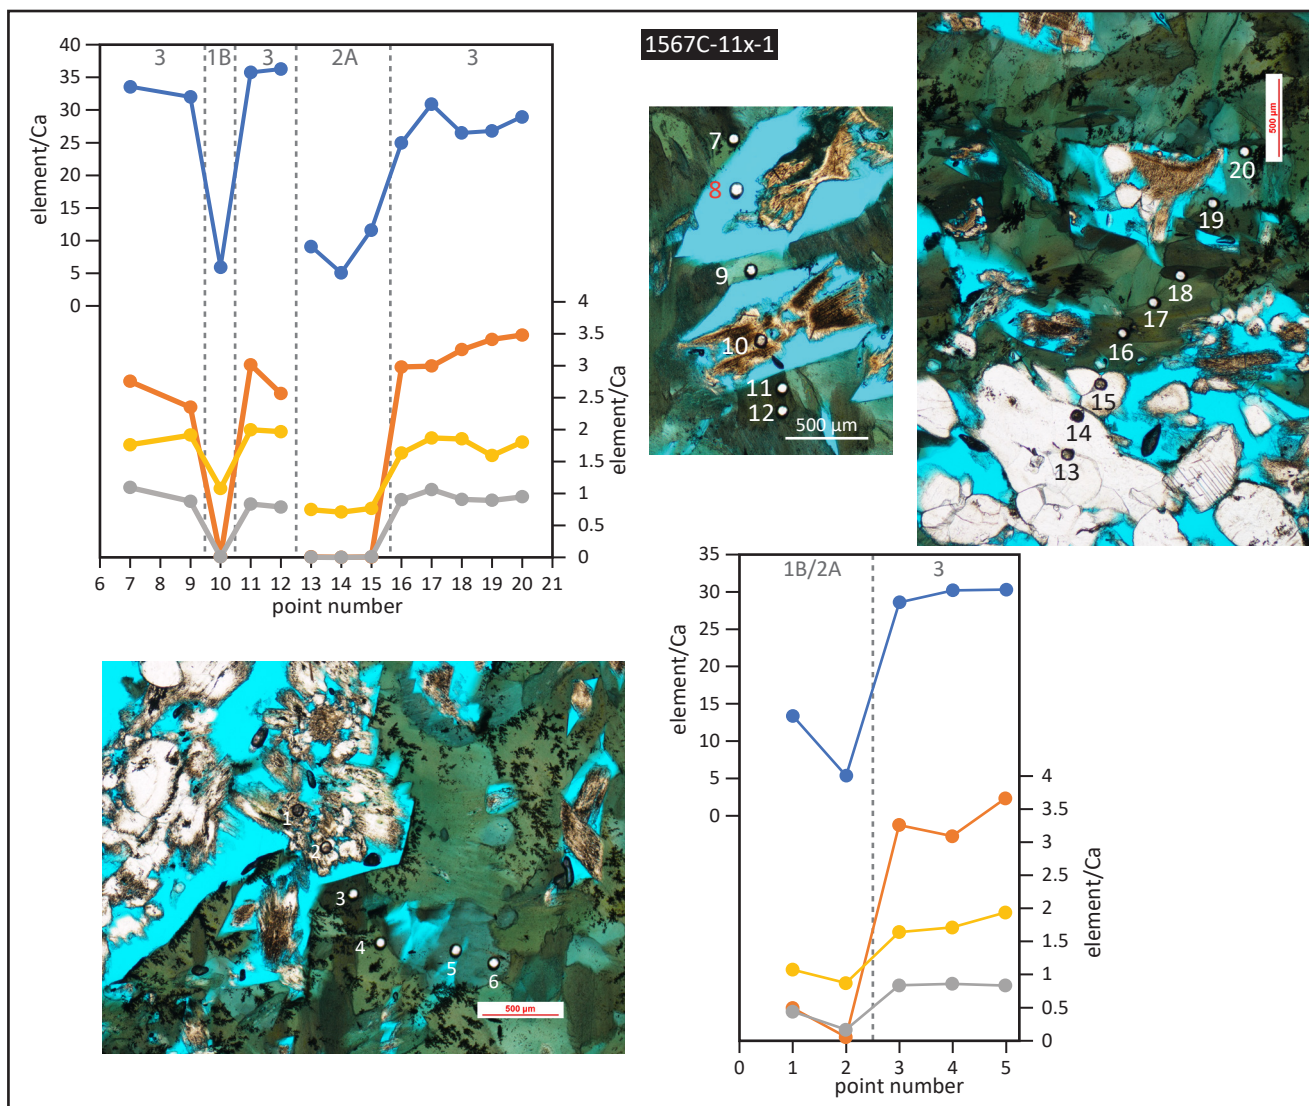

**(S3) Fig. 3.5:** Element/Ca profiles measured by LA-ICPMS across two areas of thin section of the glendonite from U1567C-11X-1, shown next to photomicrographs of the sections with labelled sample points, under plane polarised light.
