# Supplementary material for: Paleocene–Eocene age glendonites from the Mid-Norwegian Margin – indicators of cold snaps in the hothouse?
Source: Copernicus journal article supplement (doi:10.5194/cp-20-1-2024), 2024-01-03
Supplement: Supplementary file 1 [file cp-20-1-2024-supplement.zip › cp-20-1-2024-supplement-title-page.pdf]

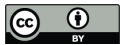

*Supplement of*

**Paleocene–Eocene age glendonites from the Mid-Norwegian Margin – indicators of cold snaps in the hothouse?**

**Madeleine L. Vickers et al.**

*Correspondence to:* Madeleine L. Vickers ([m.l.vickers@geo.uio.no](mailto:m.l.vickers@geo.uio.no))

- [cp-20-1-2024-supplement-title-page.pdf](#)
- [Supplementary\\_glendonites\\_396.xlsx](#)
- [combined\\_supplementary\\_lower\\_res.pdf](#)

The copyright of individual parts of the supplement might differ from the article licence.
