# Supplementary material for: Paleocene–Eocene age glendonites from the Mid-Norwegian Margin – indicators of cold snaps in the hothouse?
Source: Copernicus journal article supplement (doi:10.5194/cp-20-1-2024), 2024-01-03
Supplement: Supplementary file 1 [file cp-20-1-2024-supplement.zip › Supplementary_glendonites_396.xlsx]

## Sheet: PHREEQC input
Alkalinity	B	Ba	Br	Ca	Cl	Fe	K	Li	Mg	Mn	N(-3)	Na	P	pH	S	Si	Sr	Pressure
meq/kgw	uMol/kgw	uMol/kgw				uMol/kgw		uMol/kgw		uMol/kgw	uMol/kgw		uMol/kgw			uMol/kgw	uMol/kgw
2.368	400.14	0	0.837	10.04	562.268	4.05	10.05	23.41	51.05	0.3	4.214	455.23	2.806	7.852	27.23	55.88	86.92	171
3.809	515.83	0.07	0.831	10.7	562.693	50.95	12.1	22.08	49.52	62.66	77.478	478.49	21.053	7.731	26.86	233.48	89.41	171.592
4.118	580.35	0.15	0.839	11.03	569.191	19.25	11.84	20.32	49.19	86.79	92.451	481.04	6.829	7.729	25.63	223.3	92.83	172.37
4.278	595.78	0.01	0.836	10.8	567.327	17.23	11.42	19.57	46	60.51	154.485	458.2	5.919	7.691	24.23	180.31	91.08	172.97
4.2	555.39	0.01	0.845	10.89	566.488	6.88	11.72	19.37	46.17	50.4	155.02	470.09	7.356	7.81	23.67	279.67	93.13	173.572
3.984	533.51	0.02	0.843	11.01	568.831	7.54	11.59	18.85	45.04	36.6	183.363	471.19	5.536	7.828	22.86	234.65	94.06	174.268
3.792	545.94	0.04	0.844	11.4	569.558	18.18	11.27	19.9	45.04	33.04	168.924	466.73	4.578	7.703	22.45	272.39	97.6	174.868
3.787	538.82	0.18	0.849	11.27	572.971	2.55	11.24	20.65	42.24	24.43	187.641	450.91	4.147	7.791	20.52	226.52	96.76	175.47
3.1	541.4	0.03	0.843	12.29	571.808	6.38	11.99	23.43	42.46	16.88	35.765	472.05	4.29	7.885	20.2	174.28	105.38	176.172
3.225	553.8	0.26	0.847	11.93	569.612	7.63	10.87	22.46	41.37	18.55	130.42	459.31	5.344	7.785	19.93	279.88	103.9	176.774
3.436	602.8	0.06	0.846	11.99	568.317	0.29	11.08	22.34	43.35	21.06	172.133	474.64	3.285	7.884	20.69	338.11	103.67	177.376
2.912	562.7	0.01	0.838	12.38	568.894	0	11.12	26.34	42.41	17.36	87.104	480.07	6.063	7.796	20.72	223.61	106.57	178.06
2.462	512.82	0	0.849	12.51	570.069	0	11.08	24.77	43.11	9.06	97.264	455.74	6.302	7.582	19.89	206.37	107.28	178.656
2.312	488.95	0.03	0.855	12.92	570.473	13.81	11.24	26.73	43.45	5.24	72.665	473.79	3.859	7.633	20.21	308.02	112.3	179.258
2.232	490.99	0	0.847	12.56	569.6	0	10.91	26.92	42.15	2.87	78.547	470.1	1.848	7.621	19.57	242.54	110.17	179.962
2.29	539.79	0	0.842	12.65	568.048	0	11.01	27.77	43.08	2.7	59.295	476.36	1.848	7.57	19.8	277.82	111.47	180.564
2.108	509.5	0	0.847	12.35	568.271	0	10.8	28.41	41.47	2.57	52.343	463.13	1.944	7.609	19.39	281.61	108.81	181.148
2.144	412.03	0	0.852	11.08	571.27	0	11.87	29.2	37.39	0.67	42.183	493.5	2.087	8.261	20.14	138.85	101.87	181.92
2.2	408.15	0	0.847	11.63	569.24	0	11.5	27.61	42.62	4.77	59.83	477.71	4.626	8.063	20.1	131.4	102.17	184.138
2.251	366.03	0.03	0.845	11.55	569.83	6.51	11.83	26.09	44.12	5.45	29.883	471.32	2.375	8.24	20.6	188.76	100.35	185.14
2.253	386.21	0.03	0.84	11.24	567.955	0	11.85	25.66	43.98	7.01	31.487	469.18	2.614	8.078	20.24	306.08	96.85	186.058
2.719	390.98	0.04	0.847	11.22	569.406	0	11.63	25.53	45.37	9.44	32.022	469.52	2.854	8.187	21.28	332.25	96.77	187.362
2.79	356.09	0.03	0.847	11.35	568.543	0	11.88	25.97	46.49	9.54	6.353	479.82	2.135	8.176	22	376.58	98.48	189.318
2.923	348.07	0	0.846	10.98	567.953	0	11.32	27.79	45.88	9	104.216	472.3	4.099	8.248	22.46	333.99	98.66	191.28
3.097	373.76	0.21	0.845	11.02	567.721	0	11.41	35.6	47.13	6.65	130.42	484.5	3.189	8.221	23.23	353.36	103.51	193.24
3.147	417.13	0.01	0.847	11.4	568.223	1.04	9.92	35.93	48.1	11.43	126.142	471.97	2.375	7.708	23.61	536.21	107.12	195.202
3.282	418.07	0	0.837	11.07	575.705	3.22	9.52	37.32	46.34	12.53	150.207	457.01	1.752	7.688	22.82	646.27	105.73	197.162
3.568	374.21	0.03	0.842	11.34	566.913	1.12	9.73	41.88	46.82	14.18	176.411	469.4	3.333	7.715	22.97	625.95	113.3	198.8
4.106	359.9	0.13	0.834	11.5	562.466	0	8.18	51.89	47.35	17.84	176.946	442.92	2.47	7.87	22.31	615.62	122.61	200.74
4.191	340.31	0.08	0.83	12.29	560.2	0	8.42	59.19	49.25	19.38	235.236	472.93	3.38	7.87	22.16	561.31	135.33	202.382
4.801	352.69	0.28	0.817	12.22	553.58	0	7.41	75.76	47.58	19.85	306.361	444.32	3.189	8.017	19.88	523.89	148.68	205.118
4.918	363.64	0.27	0.817	12.07	551.644	0	7.35	82.63	45.23	18.42	238.979	454.51	4.961	7.726	19.31	513.34	151.38	207.198
5.285	367.3	0.3	0.824	12.73	557.845		7.09	95.59	45.48	21.16	275.344	474.22	5.057	7.695	18.55	617.28	168.02	209.482

## Sheet: LA ICP-MS
sampleID	spot number	B11(MR)_NIST610 average	F19(MR)CPS only_NIST610 average	Na23(MR)_NIST610 average	Mg24(MR)_NIST610 average	Mg25(MR)_NIST610 average	Al27(MR)_NIST610 average	Si29(MR)_NIST610 average	P31(MR)_NIST610 average	S32(MR)_NIST610 average	Cl35(MR)CPS only_NIST610 average	K39(MR)_NIST610 average	Ti47(MR)_NIST610 average	V51(MR)_NIST610 average	Mn55(MR)_NIST610 average	Fe56(MR)_NIST610 average	Ni60(MR)_NIST610 average	Sr88(MR)_NIST610 average	Cd111(MR)_NIST610 average	Ba138(MR)_NIST610 average	Nd146(MR)_NIST610 average	Pb208(MR)_NIST610 average	U238(MR)_NIST610 average	Ca cps		B11(MR)_NIST610 2SD	F19(MR)CPS only_NIST610 2SD	Na23(MR)_NIST610 2SD	Mg24(MR)_NIST610 2SD	Mg25(MR)_NIST610 2SD	Al27(MR)_NIST610 2SD	Si29(MR)_NIST610 2SD	P31(MR)_NIST610 2SD	S32(MR)_NIST610 2SD	Cl35(MR)CPS only_NIST610 2SD	K39(MR)_NIST610 2SD	Ti47(MR)_NIST610 2SD	V51(MR)_NIST610 2SD	Mn55(MR)_NIST610 2SD	Fe56(MR)_NIST610 2SD	Ni60(MR)_NIST610 2SD	Sr88(MR)_NIST610 2SD	Cd111(MR)_NIST610 2SD	Ba138(MR)_NIST610 2SD	Nd146(MR)_NIST610 2SD	Pb208(MR)_NIST610 2SD	U238(MR)_NIST610 2SD	Ca cps 2SD	B11(MR)_NIST610 2SE
LOD		0.150294		0.450523	0.157028	0.354249	0.0296118	1.73143	0.148427	0.0429479		0.150262	0.0674534	0.00555145	0.00588872	0.0224192	0.183606	0.00533541	0.00452623	0.00162059	0.000469961	0.000110642	5.86762e-05
57c3	3	0.174321	1051.49	30.0093	29.4249	28.6037	0.00842799	1.29847	15.0045	0.870693	29261.5	0.722565	0.0203379	0.0127917	3.2605	0.837398	0.0057601	1.64133	0.000129222	0.104452	0.0105076	1.45678e-05	0.000923595	6.70283e+06		0.144861	3511.07	50.3209	20.186	17.2183	0.0502181	2.40888	9.60337	0.439444	36501.1	0.384005	0.0278899	0.00831347	1.51653	0.446301	0.014696	1.10141	0.000670475	0.0624787	0.0066044	6.3717e-05	0.000722038	3.89232e+06	0.0252171
57c4	4	0.177973	918.901	17.7225	26.4918	30.2012	0.0283688	0.964823	17.389	0.527813	28536.1	0.573868	0.0228329	0.0148583	3.09249	0.860621	0.00357224	1.71197	8.20157e-05	0.12251	0.00901996	7.48985e-06	0.00086619	9.56468e+06		0.101909	3075.79	24.9225	15.4719	18.2542	0.0361557	1.99164	13.4789	0.272903	34430	0.285872	0.0292906	0.0124581	1.87731	0.674158	0.0110022	1.13173	0.000454747	0.0813074	0.00580818	4.12718e-05	0.00064366	5.46425e+06	0.018924
57c5	5	0.236876	588.952	21.7659	28.945	30.2951	0.0335786	2.04716	21.3583	0.696869	19618.4	0.646631	0.0262463	0.0118723	3.66332	0.834082	-0.0031323	1.93856	0.000110916	0.128457	0.0114865	7.52357e-06	0.000697436	4.28799e+06		0.185372	3545.47	12.8949	20.3902	27.2694	0.157734	5.20405	20.8501	0.355878	11158.3	0.339106	0.0467577	0.00823029	2.43306	0.611592	0.0403661	2.28421	0.000685071	0.104771	0.0140852	5.46805e-05	0.000802508	4.41365e+06	0.0293098
57x7	7	0.200146	342.978	27.7887	31.6943	33.5735	0.0270961	0.608603	16.5944	0.706897	29862	0.469342	0.0232983	0.0184792	2.75468	1.09362	0.0031127	1.7603	0.000118348	0.159887	0.0102326	1.07328e-05	0.000864263	7.52951e+06		0.183381	2288.61	28.3809	16.4299	18.4718	0.0466452	1.98591	10.1632	0.288487	17536.8	0.18802	0.0204288	0.0114568	1.48368	0.477562	0.0161335	0.948035	0.000725138	0.0894535	0.00650386	5.3128e-05	0.000602141	3.30204e+06	0.0314496
57x9	9	0.193938	-114.109	17.0627	31.5668	32.0255	0.0235375	1.08493	15.7684	1.05847	16516.3	0.392512	0.0199304	0.0144001	2.34761	0.876175	0.0025291	1.91384	5.87533e-05	0.160036	0.00699934	4.03322e-06	0.000640568	7.31006e+06		0.105965	2788.94	14.5368	19.6544	15.4417	0.0611851	2.42648	7.47659	0.49512	7383.61	0.142407	0.0249365	0.00948208	1.31927	0.447454	0.0183231	0.912139	0.000682425	0.129962	0.00491912	2.52906e-05	0.000404347	3.76299e+06	0.0181728
57x11	11	0.217903	440.021	16.1044	36.1529	35.7795	0.065789	1.02623	18.2675	0.95201	16857.9	0.460571	0.0192948	0.0109435	3.01359	0.833525	0.00255798	1.99593	0.000217381	0.173245	0.00868591	1.96384e-05	0.000607181	6.6613e+06		0.138853	3125.85	14.0393	28.5132	22.9469	0.152044	2.41471	11.9023	0.398598	14470.1	0.238881	0.0245892	0.00636058	1.53945	0.564805	0.0203291	1.15278	0.000921225	0.144214	0.00753625	0.000108834	0.000582533	3.54007e+06	0.0219546
57x12	12	0.196105	837.039	26.1483	33.3174	36.2963	0.0561986	0.857253	16.2418	1.0312	27633.1	0.404105	0.0204403	0.0110048	2.56168	0.786673	0.0027719	1.96721	0.000271789	0.166056	0.0074552	1.31909e-05	0.000502357	6.98053e+06		0.133088	2998.58	17.3579	17.2261	21.1011	0.339332	2.60241	8.88702	0.423603	28753.4	0.164845	0.0391899	0.00752906	1.15619	0.399977	0.0150135	1.31095	0.00126221	0.114642	0.00474084	6.35691e-05	0.00054789	3.30616e+06	0.020536
57x16	16	0.193039	1094.61	9.06876	23.4656	24.9587	0.146102	1.33129	17.3468	0.661142	14087.8	0.513956	0.0242949	0.0140319	2.97753	0.901415	-0.000200045	1.63158	6.39132e-05	0.104762	0.00838808	3.42743e-05	0.000684624	8.31704e+06		0.107945	3051.46	8.57658	10.8009	19.1334	0.157407	2.22522	15.0898	0.361767	4899.48	0.836937	0.02928	0.00915331	1.71518	0.553521	0.0137326	1.33401	0.000596394	0.0544685	0.00459653	0.000165902	0.000586157	4.26457e+06	0.0200449
57x17	17	0.185843	899.447	7.92369	30.8694	30.907	0.0268832	0.687007	16.8199	0.53884	14409.1	0.440314	0.0235118	0.019358	2.99259	1.06115	0.00611944	1.86746	4.95014e-05	0.12326	0.0108761	1.28121e-05	0.000907655	8.86125e+06		0.124305	2743.4	3.87456	17.4976	15.9647	0.0568429	2.50194	9.28152	0.222693	4271.11	0.434318	0.0220962	0.0104187	1.46133	0.599163	0.0157612	1.01335	0.00047131	0.066476	0.0065881	6.3165e-05	0.000619422	4.49663e+06	0.0223259
57x18	18	0.179493	495.15	8.94882	27.3231	26.5104	0.022698	1.12892	15.9524	0.998307	13097.7	0.42084	0.0232627	0.0150437	3.25067	0.906732	0.00775018	1.85274	0.000326802	0.119244	0.0103177	1.80723e-05	0.000765271	5.84819e+06		0.0968397	2998	2.82762	10.8631	11.0865	0.0557404	2.47146	8.50335	0.335149	3430.32	0.125608	0.0265809	0.0100487	1.07364	0.41393	0.019484	0.825178	0.00153358	0.0621861	0.00687938	7.35444e-05	0.000544829	1.89178e+06	0.0147679
57x19	19	0.188688	363.692	8.4768	27.4032	26.8108	0.017486	0.777811	17.1372	0.656408	13017.9	0.410835	0.0237021	0.0129096	3.41065	0.892645	0.00362391	1.59207	0.000115773	0.119467	0.0104627	7.30324e-06	0.000649238	6.40398e+06		0.14531	3046.7	4.66477	16.1004	14.7493	0.0717431	2.89622	11.8241	0.302057	4742.33	0.17398	0.0301526	0.0080968	1.80842	0.443397	0.0210633	1.04526	0.000850595	0.0777292	0.00661078	5.46381e-05	0.000751576	3.37476e+06	0.0242184
57x20	20	0.20935	574.055	15.886	28.6074	28.9713	0.0233561	0.654992	17.7451	0.640615	17349.5	0.429314	0.0231273	0.0158505	3.4773	0.94814	0.00468917	1.80309	0.00026681	0.141911	0.0105191	7.51356e-06	0.000762069	6.76452e+06		0.168606	3458.02	17.5034	17.7642	15.6912	0.0532986	2.28849	9.05778	0.244828	9888.73	0.15906	0.027922	0.00781154	1.40695	0.524493	0.0198114	1.01515	0.00108789	0.0863393	0.00662933	4.56976e-05	0.000658621	3.10642e+06	0.0277186
90A5	5	0.0828902	370.813	8.23196	16.9431	16.0577	0.000160423	1.61598	0.295385	1.39515	3912.38	0.0660385	0.00224741	0.00351986	0.0412508	0.00413931	-0.0126262	1.03087	1.30784e-05	0.00308782	0.000248669	2.21408e-06	1.72784e-06	7.30601e+06		0.0595494	2253.07	1.55701	1.64469	3.2887	0.0174078	2.14908	0.167145	0.153191	10933.2	0.0226212	0.00682092	0.0025414	0.00970637	0.00361709	0.0271841	0.113353	0.000388403	0.00141137	0.000684784	1.67652e-05	9.70288e-06	1.66453e+06	0.00817974
90A6	6	0.0690284	649.854	5.76452	12.3368	11.7517	-0.0030686	1.1479	0.205137	1.35669	2181.85	0.0508788	0.00148587	0.00281246	0.0323602	0.00287215	-0.00275173	1.08255	7.79226e-05	0.00280528	0.000199861	2.12829e-06	0	7.48492e+06		0.0484377	2088	1.05786	2.90279	3.06384	0.0323287	2.00045	0.102168	0.206331	8147.76	0.0197539	0.00564706	0.00216553	0.00953349	0.00377074	0.0230688	0.180597	0.000537009	0.00148413	0.000486254	2.27451e-05	0	1.59568e+06	0.00665343
90A7	7	0.0807414	165.363	5.69364	19.4808	18.0348	-0.00302116	0.820077	1.01726	1.37655	3809.94	0.043996	0.00336631	0.0022623	0.0526214	0.00425369	-0.00428614	1.27888	0.000177046	0.00865328	0.000215218	4.25725e-06	1.76619e-06	7.17378e+06		0.0495076	2034.55	1.38554	2.14404	2.70192	0.0303572	2.1067	0.237175	0.11818	12802.9	0.0226704	0.0106209	0.00228188	0.0225137	0.00389009	0.0258467	0.110265	0.00104895	0.00348835	0.00060263	3.97923e-05	9.16518e-06	1.60693e+06	0.00650066
90A8	8	0.0808787	116.377	5.95594	21.3624	19.5589	-0.000772469	1.06428	1.34225	1.37199	2611.91	0.0536178	0.00354393	0.00270826	0.103784	0.0150399	-0.00230341	1.28065	8.57693e-05	0.0108011	0.000525048	6.91282e-08	1.34506e-05	7.39108e+06		0.0575125	2376.39	1.41407	4.27422	2.93978	0.0345626	1.88901	0.273287	0.21628	9809.82	0.0286159	0.0095135	0.00204734	0.0299337	0.0125842	0.0249636	0.207161	0.000788612	0.00285037	0.000972412	1.42486e-05	4.20114e-05	2.0175e+06	0.00724589
90A11	11	0.070896	415.582	4.65457	11.1298	10.5496	0.0443859	1.57591	0.213958	1.36736	1516.61	0.053912	0.00208081	0.00376341	0.033644	0.0069905	-0.00410876	1.05292	-3.20331e-05	0.00416846	0.000381338	-8.42809e-07	0	7.99576e+06		0.0504248	2142.32	0.834619	1.33321	2.1994	0.452892	1.75207	0.136543	0.174258	1242.06	0.0199792	0.0085708	0.00277923	0.00970705	0.00408486	0.0218691	0.199013	0.000342476	0.00145301	0.000646941	2.33915e-07	0	2.18634e+06	0.00686195
90A12	12	0.104699	224.358	8.99015	21.9549	20.4138	-0.00093948	1.48854	0.533979	1.3506	2718.91	0.0941947	0.00298013	0.00329596	0.0614021	0.01477	-0.00309443	1.07675	0.000116068	0.0065798	0.000834217	5.58733e-07	6.21224e-06	7.54398e+06		0.068974	2283.92	2.8076	7.28668	5.40013	0.0308566	1.90806	0.18575	0.227121	9127.82	0.0331774	0.00865697	0.00221302	0.0149863	0.00927651	0.0230348	0.178223	0.00077081	0.0028372	0.000907886	1.64257e-05	3.34855e-05	2.04369e+06	0.00883121
90A13	13	0.0931058	216.586	8.865	21.0057	19.7781	0.0972847	1.26839	0.292329	1.38972	1250.09	0.0631604	0.00117954	0.00215935	0.0453397	0.00911496	-0.000754462	1.16714	0.000132105	0.00618189	0.000535109	3.35995e-06	1.03047e-05	7.52899e+06		0.057824	2593.38	1.14447	5.22812	5.67311	0.401448	1.77507	0.109667	0.139782	3567.74	0.0214146	0.00626742	0.00216078	0.0161356	0.00490257	0.0206851	0.136019	0.000637907	0.00211175	0.00107247	5.43685e-05	4.7983e-05	1.67019e+06	0.00772706
90A20	20	0.0560096	314.116	4.46691	9.49964	9.098	0.0518996	2.20315	0.093103	1.38708	971.569	0.0347183	0.00174141	0.00126695	0.0341256	0.0145916	-0.00248407	0.89197	0.000167865	0.00142013	0.000476102	1.06486e-07	1.68722e-05	7.759e+06		0.038222	2740.42	0.915097	1.49858	1.61238	0.269249	2.74784	0.106085	0.191917	1093.09	0.0205035	0.00722639	0.00152503	0.0354169	0.0210242	0.0208256	0.134104	0.000887323	0.000803294	0.000987274	7.75265e-06	6.12557e-05	1.62727e+06	0.00515385
90A21	21	0.0848464	207.359	7.71212	13.7612	12.91	-0.00418233	1.36504	0.0701456	1.41556	958.576	0.0692266	0.00222628	0.00202468	0.0147972	0.00519281	-0.00302974	0.830902	0.000194034	0.0013501	0.000207631	-4.07765e-07	0	7.85322e+06		0.0553469	2670.37	1.05286	1.39789	1.95992	0.0301304	1.66951	0.0501271	0.156678	1242.68	0.0200013	0.00823464	0.00164191	0.00610079	0.00541669	0.0170933	0.197003	0.000971787	0.000952236	0.00049845	8.0172e-08	0	1.45733e+06	0.00807317
90A22	22	0.0762572	301.584	5.09425	11.8594	11.3609	0.0222541	1.46286	0.160401	1.36385	1277.4	0.0632352	0.00219126	0.00306325	0.0286388	0.0101553	-0.00202879	0.955507	0.000159437	0.00268796	0.000176334	1.93071e-06	2.44818e-06	7.68029e+06		0.0571079	2599.68	0.870133	1.1898	1.28741	0.149746	2.01352	0.107774	0.154531	1283.48	0.0215076	0.00930007	0.00226565	0.0119409	0.0066524	0.0150914	0.11953	0.000769164	0.00122095	0.000408521	2.38033e-05	1.35528e-05	1.53757e+06	0.00743481
90A23	23	0.0692394	263.496	4.48976	15.9257	14.7481	0.262269	1.35779	0.401156	1.35404	1380.65	0.0611308	0.00360003	0.00377048	0.0785026	0.0327084	-0.00315279	1.0833	0.00010158	0.00736414	0.000843474	9.37607e-07	1.96809e-05	8.08042e+06		0.0539156	2953.06	0.812629	7.57977	5.21712	1.04137	2.02314	0.243063	0.176541	1154.12	0.0202852	0.00949447	0.00217031	0.0591743	0.0241824	0.0162562	0.264566	0.000619855	0.00494846	0.00130054	1.12513e-05	5.04618e-05	1.71196e+06	0.00714129
57c1	1	0.0839564	769.686	11.7648	14.0406	13.3787	0.268859	1.47988	2.53337	1.45087	7782.87	0.174809	0.0108751	0.00696784	0.492774	0.438714	0.00112663	1.07373	9.35353e-05	0.0208306	0.0012222	4.72632e-06	0.000187324	6.79e+06		0.0639624	2822.1	9.76921	3.15422	1.97261	2.4617	2.6501	3.22793	0.178587	7406.63	0.111612	0.0182676	0.00647571	0.499026	0.508182	0.0197708	0.28594	0.000634396	0.0195419	0.00160205	2.61324e-05	0.000295841	1.80343e+06	0.00759094
57c2	2	0.0660311	672.547	3.89534	5.25309	5.3494	0.0264647	0.936395	0.511706	1.39516	974.791	0.0428447	0.00462202	0.0027182	0.0555421	0.165182	-0.000777873	0.871468	5.69048e-06	0.00565149	0.000120201	4.15589e-06	2.23129e-05	6.8905e+06		0.0544047	3563.08	1.0128	1.06241	1.10471	0.0639871	2.36147	0.302091	0.225025	1435.39	0.0263431	0.0121512	0.00240756	0.0249919	0.14265	0.0154398	0.150244	0.00042229	0.0026213	0.000449991	3.00681e-05	6.44127e-05	2.19604e+06	0.00645665
57x10	10	0.0846499	255.595	4.97875	5.94996	5.93008	0.126112	1.19569	0.303785	1.44456	846.557	0.090008	0.00928807	0.00608405	0.0118621	0.00788913	-0.000616694	1.07827	0.000181541	0.00817091	0.000125694	2.26586e-06	5.58126e-06	7.09467e+06		0.0576333	2755.8	1.53766	1.61969	1.73402	2.13093	2.13807	0.204945	0.201316	1124.83	0.0350869	0.0148205	0.00356994	0.0352271	0.0106024	0.0158069	0.136312	0.000959602	0.0038524	0.000468015	1.85836e-05	3.64284e-05	2.22215e+06	0.00679215
90A25	25	0.0621117	-63.4244	4.10152	12.4843	11.9558	0.12658	1.23918	0.540516	1.39154	1677.48	0.0667451	0.00339506	0.00467053	0.212967	0.142674	-0.00475426	1.103	0.000102566	0.00414823	0.00211289	3.72561e-06	8.75463e-05	7.91597e+06		0.0498155	2162.31	0.94232	1.54102	2.27919	1.25668	1.85915	0.170449	0.162169	1458.2	0.0300016	0.00771889	0.00260822	0.0415644	0.0286991	0.0152415	0.134969	0.00066043	0.00154338	0.00177204	2.80746e-05	0.000123581	1.84947e+06	0.0071165
90A26	26	0.0642504	486.362	4.17636	7.36362	6.90808	0.165419	1.63118	0.355316	1.40417	1877.75	0.0774111	0.00489212	0.00448967	0.0952077	0.0804986	-0.00138322	1.18032	7.59213e-05	0.00147421	0.000166831	2.17667e-06	9.63411e-07	8.01353e+06		0.0439519	3160.12	0.916466	2.48741	1.17276	1.4859	2.8742	0.142253	0.138532	1833.42	0.0452687	0.00932787	0.00286862	0.0332824	0.0181336	0.0146424	0.329993	0.000607343	0.000859948	0.000417197	1.79493e-05	7.64334e-06	2.2991e+06	0.00592647
90A27	27	0.0727445	28.2308	4.27575	10.3077	9.93854	0.457677	1.43952	0.626308	1.38969	1573.49	0.135677	0.112953	0.00560283	0.196245	0.220265	-0.000274132	1.16736	1.6893e-05	0.00338299	0.00160445	7.53348e-06	4.40101e-05	8.10745e+06		0.0575831	3056.63	0.825457	1.69132	1.65948	1.00319	2.32821	0.203691	0.165436	1611.3	0.299616	0.530453	0.00322261	0.0389019	0.110879	0.0175424	0.124322	0.000310439	0.0019366	0.00135067	5.43344e-05	0.000100588	1.94408e+06	0.00783607
90A28	28	0.0683322	728.692	4.74375	12.7337	12.5695	0.173087	1.33858	0.251511	1.37475	1723.78	0.0623742	0.00208007	0.0031355	0.0425037	0.0110147	0.00159922	1.08411	3.85905e-05	0.00473807	0.00042509	1.08657e-05	0	7.99832e+06		0.0550473	3132.49	0.845554	1.79214	3.23254	0.828343	2.08056	0.124472	0.185924	1514.17	0.021683	0.00751171	0.00263781	0.0165156	0.00604777	0.0156633	0.18529	0.000515998	0.00243721	0.000685504	9.92764e-05	0	2.20433e+06	0.00722806
90A30	30	0.0770836	486.966	4.76173	12.133	11.384	0.0343152	1.14514	0.20245	1.40626	1652	0.0653976	0.00279993	0.00352233	0.0524821	0.00929794	0.00018457	1.05105	4.7866e-05	0.004138	0.000195214	-7.57301e-07	0	8.4081e+06		0.0490327	3232.16	0.711948	1.78421	1.46457	0.171295	1.78613	0.0715009	0.174305	1485.26	0.0221975	0.00915425	0.00236439	0.0537533	0.0085363	0.0172876	0.103323	0.000429955	0.00125484	0.000485792	1.83456e-07	0	2.07222e+06	0.00707726
90b4	4	0.0743938	216.453	4.86145	8.21478	7.85225	0.133136	1.42189	0.294738	1.32079	3892.92	0.0922842	0.0157845	0.00539274	0.0640858	0.0591585	-0.00889064	1.04275	0.000119656	0.00131755	0.000421026	7.62833e-06	1.18728e-05	7.73855e+06		0.0532801	1797.1	1.02474	1.22928	2.01399	0.316105	2.33366	0.148517	0.208551	10981.1	0.0676941	0.0361837	0.0030771	0.0194496	0.0590294	0.0224732	0.167699	0.00118639	0.000873843	0.000628654	3.75426e-05	5.09143e-05	2.29129e+06	0.0072505
92c15	15	0.0649787	347.526	4.74811	11.8715	11.6964	0.0989256	1.00324	0.565861	1.40496	6790.56	0.0646569	0.00702598	0.0034313	0.256486	2.90126	-0.00533913	1.31734	0.000382396	0.00314147	0.000243074	1.422e-05	1.28802e-05	6.37781e+06		0.0645654	3145.89	1.75123	2.38607	2.08526	0.490514	2.42815	0.215032	0.13548	3476.54	0.0577653	0.0154727	0.00259002	0.484697	2.71988	0.0229515	0.213466	0.00186244	0.00136592	0.000557756	8.85106e-05	5.13176e-05	1.59044e+06	0.0144373
92c16	16	0.0540061	321.308	3.65989	10.6858	10.495	0.0157137	1.00388	0.355683	1.47161	797.602	0.0382737	0.00199331	0.00179241	0.00925018	0.0136197	-0.0047649	1.28791	7.25405e-05	0.00235403	0.000103024	1.11473e-05	0	7.63831e+06		0.0401934	2712.2	1.29519	1.05573	1.81828	0.0974055	2.29074	0.18147	0.124404	1532.34	0.0200723	0.0101778	0.00190642	0.00690546	0.0267387	0.014779	0.0917048	0.000522226	0.000967302	0.000263985	7.4066e-05	0	1.36124e+06	0.00679393
92c17	17	0.0536417	-32.7489	3.39103	12.1546	11.7113	0.0458468	0.739972	1.23025	1.42543	1551.65	0.0362574	0.0025211	0.00284967	0.0459595	0.0733604	-0.00418515	1.35404	7.61109e-05	0.00497513	0.000193576	-4.02852e-07	4.24148e-06	8.07552e+06		0.0433678	2926.57	0.78418	1.74186	1.47826	0.229988	1.74942	0.37138	0.182709	1657.82	0.0197055	0.00826188	0.00241551	0.0268208	0.052249	0.0136879	0.164968	0.000524936	0.00182813	0.00055174	8.38237e-08	3.17089e-05	1.76191e+06	0.00733049
92c22	22	0.0795555	1087.65	4.08363	22.7779	22.5194	0.0342287	1.07809	2.57401	1.46798	1730.52	0.086736	0.0175366	0.0112004	0.517884	2.97433	-0.00199245	1.8389	0.000153113	0.0306831	0.00046543	7.26162e-06	2.51744e-05	7.82638e+06		0.052641	3234.62	1.20429	9.1403	8.585	0.0784948	2.16265	0.901854	0.147552	1481.73	0.046572	0.0210195	0.00625502	0.151911	2.33729	0.0163286	0.3839	0.000621049	0.0125901	0.000747438	4.58107e-05	7.55279e-05	1.50299e+06	0.0094546
92c23	23	0.111153	770.7	4.63707	4.52789	4.47465	0.472086	1.23797	0.494465	1.46372	2144.63	0.0858238	0.0122044	0.0107947	0.290192	3.38437	-0.000952823	1.34052	6.66706e-05	0.00701685	0.000845281	2.45708e-06	1.86762e-05	7.70714e+06		0.0723239	2254.5	0.964876	0.571742	0.762082	0.780117	1.94354	0.219597	0.100528	2077.12	0.0316591	0.0155457	0.00449536	0.16376	2.73712	0.0133912	0.159857	0.000393093	0.00204651	0.000833411	1.75049e-05	6.42385e-05	1.37031e+06	0.0134302
92c24	24	0.0738161	21.175	3.89974	23.2865	22.5165	0.101141	2.02626	3.3412	1.49818	2726.67	0.0962294	0.0125456	0.00823922	0.709745	3.83438	0.00287678	1.8988	0.000296788	0.0387238	0.000600052	1.8395e-05	1.34096e-05	7.74322e+06		0.0471141	2879.01	1.06934	1.64409	1.81915	0.101764	3.57309	0.40981	0.131766	2281.67	0.0350197	0.0160547	0.00379599	0.193646	2.38912	0.0312729	0.117069	0.00088835	0.0113659	0.00103867	7.61789e-05	5.44977e-05	588561	0.00890372
92c25	25	0.061842	586.145	4.80091	20.905	20.8401	1.26614	1.61302	2.37952	1.47926	4605.87	0.098951	0.0260205	0.0114964	0.7875	5.88113	0.000250911	1.5976	0.000267648	0.0240222	0.000600541	4.39053e-05	3.38351e-05	7.18324e+06		0.0365431	2930.1	0.968447	3.71531	4.68886	1.45876	3.1338	0.461572	0.117824	3596.28	0.0501284	0.0367226	0.00678583	0.654374	7.30374	0.0193041	0.132104	0.000855067	0.00460005	0.000926219	0.000154391	8.1732e-05	2.53847e+06	0.0110182
92c27	27	0.114756	518.31	4.72203	5.49895	5.33076	0.975752	3.40773	0.854893	1.4701	1961.92	0.326424	0.0346563	0.0140217	0.371362	1.35135	0.000685851	1.20301	0.000109225	0.013579	0.00189196	3.57554e-05	3.63377e-05	7.90899e+06		0.0915282	2177.59	0.968297	2.12506	2.00177	1.54515	4.2409	0.40844	0.265232	1360.55	0.397624	0.0431784	0.00607954	0.135413	1.2153	0.0192282	0.234533	0.000654846	0.00387439	0.001813	0.000141471	9.27961e-05	1.90362e+06	0.015933
92c28	28	0.0389111	271.903	2.10716	5.52697	5.63491	0.0657982	1.2045	0.243099	1.4436	1252.55	0.0292838	0.00577488	0.0023417	0.0673627	0.152814	0.000256998	0.824187	6.28898e-05	0.00180479	0.000299313	-1.27279e-06	9.3717e-06	7.60905e+06		0.0406373	2721.1	0.736368	1.42431	1.25928	0.0853387	2.12645	0.122581	0.134004	1109.9	0.0314883	0.0131527	0.00205629	0.0242	0.0998624	0.0156521	0.0669553	0.000423845	0.00142487	0.000603265	1.70111e-07	3.08419e-05	1.12227e+06	0.00729868
90A1	1	0.0450029	254.764	1.56421	0.297273	0.286952	-0.00589438	1.431	0.0708052	1.32046	3262.39	0.0181349	0.0017325	0.00245737	0.0359958	0.00256404	-0.00524336	1.14215	2.90652e-05	0.000219657	0.000163551	-9.23177e-07	1.25203e-06	7.70908e+06		0.0387606	1781.98	0.574418	0.11463	0.136748	0.0233279	2.12984	0.0466428	0.239779	10848.2	0.0157801	0.00551841	0.00198379	0.0147685	0.00278092	0.0241519	0.190641	0.000843887	0.000331387	0.000446701	1.48334e-05	7.78898e-06	2.21722e+06	0.00508952
90A2	2	0.0434861	181.948	1.63086	1.0415	1.04255	-0.00228459	1.15921	0.100094	1.32171	1756.79	0.0310093	0.00129834	0.00287723	0.0419511	0.00341312	-0.00823292	1.068	0.000135506	0.000375093	0.00014531	-2.51126e-06	2.40843e-06	8.10669e+06		0.0370415	1775.45	0.682627	1.26265	1.28844	0.0233001	1.92637	0.0752659	0.239855	5970.36	0.0194021	0.00527321	0.00208453	0.0155448	0.00321277	0.0254114	0.246964	0.000552192	0.000525512	0.000367273	6.19172e-07	1.4646e-05	2.39189e+06	0.0057849
90A3	3	0.055507	-378.294	4.25577	12.957	12.2708	0.0836442	1.55679	0.340464	1.3463	2067.57	0.0427784	0.00163683	0.00247841	0.0510366	0.00789945	-0.0049359	0.972864	7.51511e-05	0.00243242	0.000108734	1.28548e-06	1.47913e-06	8.03794e+06		0.0336813	1534.78	0.852868	3.08361	3.90941	0.427563	2.05861	0.119593	0.117797	5497.53	0.0160965	0.00554561	0.00224733	0.0299336	0.00890874	0.0210366	0.122243	0.000489512	0.00101259	0.000283236	1.12066e-05	8.87182e-06	1.64791e+06	0.00491292
90A4	4	0.0791596	370.392	5.82883	14.0176	12.9333	-0.00387027	1.13304	0.332797	1.36266	2553.53	0.0603851	0.0185391	0.00393676	0.0472952	0.00457999	-0.00611065	1.00117	0.000195059	0.00260687	0.000237492	1.77866e-06	1.07396e-06	7.45984e+06		0.0691417	2050.82	1.34799	2.87336	1.92447	0.0232406	2.04088	0.118205	0.163362	8432.12	0.0232768	0.162649	0.00245026	0.0100153	0.00339042	0.0290927	0.287618	0.00106377	0.000999633	0.0005715	1.37703e-05	1.01711e-05	1.55309e+06	0.00958822
90A14	14	0.0629261	473.584	3.5224	4.00745	3.84944	0.420688	1.17625	0.288368	1.3625	2098.65	0.0750242	0.00941341	0.00456318	0.0914518	0.0489255	-0.00117731	1.08811	0.000173396	0.00117307	0.00083895	9.14004e-06	4.00154e-06	8.19682e+06		0.0547305	2490.62	1.00084	1.08694	1.08474	0.407647	2.35201	0.100765	0.136694	4829.82	0.0594591	0.0209993	0.00333999	0.0273514	0.071279	0.0161621	0.106767	0.000994337	0.00069142	0.000961711	6.64994e-05	2.27229e-05	1.57512e+06	0.00815874
90A15	15	0.0678001	247.353	3.67539	3.3989	3.30079	0.1542	1.15668	0.275941	1.37592	1374.26	0.0562642	0.00458414	0.00452378	0.0514176	0.0238165	-0.00781031	1.16129	0.000161176	0.00120212	0.000200057	3.50248e-06	1.96463e-06	7.76911e+06		0.0509906	2305.01	0.89693	1.12576	1.04477	0.724631	2.15836	0.167044	0.193102	1451.81	0.0192488	0.0132869	0.00248293	0.0119992	0.018548	0.0233806	0.208014	0.0012248	0.000820746	0.000483531	2.86023e-05	1.48166e-05	2.19676e+06	0.00652868
90A16	16	0.0619923	32.166	4.07496	3.17728	3.15923	0.0994626	1.32087	0.19663	1.35151	1764.16	0.0690724	0.00551348	0.00516682	0.0491903	0.0166726	-0.00370144	1.18556	0.000234314	0.00125349	0.00010796	3.84567e-06	1.31462e-06	8.26408e+06		0.0438586	2280.35	1.1626	1.39827	1.37751	0.40856	1.8773	0.0956869	0.145663	1234.89	0.0285236	0.0117586	0.00345574	0.0150225	0.00987096	0.017252	0.174908	0.00128811	0.000845591	0.000378187	2.20893e-05	8.15144e-06	2.12318e+06	0.00602444
90A17	17	0.0614214	277.562	4.15297	7.55612	7.29606	0.269093	1.34956	0.577686	1.36905	1930.42	0.0626017	0.00371274	0.00373324	0.0702504	0.0074605	-0.0033504	1.1698	0.000107583	0.00159388	6.69148e-05	3.72091e-06	2.38599e-06	8.28164e+06		0.0517016	2675.29	1.09913	0.95715	1.54474	1.06846	2.01783	0.155635	0.183464	1744.99	0.0221322	0.00915763	0.00296385	0.0141441	0.00598563	0.0153427	0.14347	0.000515855	0.000700019	0.000268598	2.84332e-05	2.33778e-05	1.68364e+06	0.00731171
90A18	18	0.0778486	106.212	4.41678	5.03033	4.95234	1.03377	1.43846	0.331355	1.37456	1601.2	0.0671192	0.00577077	0.00484556	0.113231	0.0351293	-0.00393222	1.14293	6.73087e-05	0.00227334	0.000857757	5.24197e-07	1.92787e-05	7.92419e+06		0.0546356	2166.6	1.03871	1.1161	1.4914	2.57894	2.07013	0.173407	0.161096	1423.52	0.0246822	0.0118734	0.00317665	0.0405236	0.0179316	0.0170515	0.160225	0.000650414	0.00135212	0.00120422	1.52806e-05	4.8284e-05	2.19999e+06	0.00723666
90A19	19	0.0623212	92.8017	3.70887	4.37306	4.46743	1.76437	1.5397	0.315021	1.37948	1485.47	0.0563345	0.00505785	0.00387511	0.156692	0.0514685	-0.00164861	1.13289	0.000105029	0.00191103	0.00147289	2.29603e-06	2.11841e-05	8.63852e+06		0.0444847	2534.77	1.83881	2.18538	2.63128	1.87485	2.06454	0.109081	0.108081	1339.29	0.0266543	0.00948058	0.00218825	0.0282479	0.012113	0.0181472	0.211498	0.000870454	0.00125851	0.00122659	2.15386e-05	5.91629e-05	1.12981e+06	0.00741412
90b1	1	0.0742098	152.34	5.58839	8.12136	7.9435	0.0957496	4.40207	0.0614883	1.30446	905.32	0.0574048	0.00429813	0.00154604	0.0237028	0.0186225	-0.0106679	0.869422	4.28316e-05	0.0114084	0.000118092	1.58836e-05	2.233e-05	6.91449e+06		0.053726	1390.18	13.2153	3.00635	3.42237	0.812898	31.6704	0.058938	0.188348	3246.91	0.265554	0.0256644	0.00155131	0.0119337	0.0672595	0.0339431	0.224779	0.00066128	0.00607397	0.000426908	0.000126827	0.000154634	2.34721e+06	0.00661321
90b2	2	0.0676655	82.657	6.21564	16.5039	15.5456	0.0917462	1.74214	0.144452	1.32094	2323.36	0.0545435	0.0184188	0.00291113	0.028474	0.0511595	-0.00749119	1.00031	0.000117792	0.00162274	0.00038195	2.58811e-06	1.23703e-05	7.01016e+06		0.0471865	1521.18	1.4527	3.45052	4.39489	0.734875	3.85595	0.0845921	0.222839	8519.23	0.051613	0.168242	0.00251697	0.0143167	0.0539165	0.0274936	0.232072	0.000884255	0.000946363	0.0006277	1.81568e-05	4.82966e-05	1.86356e+06	0.00580826
92c7	7	0.0741141	457.183	4.98072	13.9109	13.3215	0.0519987	1.29354	1.17002	1.4658	1278.66	0.0525762	0.00279867	0.00346767	0.0268589	0.0439097	-0.00456957	1.13671	0.000194373	0.00177897	3.20342e-05	3.99866e-07	2.78181e-06	7.27014e+06		0.0514703	2972.22	0.716297	2.58066	1.56936	0.242312	2.0536	0.447413	0.145679	1155.49	0.0238789	0.0114814	0.00232311	0.0221113	0.152995	0.0190312	0.147247	0.0010073	0.00122302	0.000160554	1.07477e-05	2.42512e-05	1.1925e+06	0.00794204
92c8	8	0.0841294	251.079	8.0603	16.2539	16.822	0.0215171	1.36242	0.546543	1.45045	1127.47	0.0730308	0.00373146	0.00383425	0.0178439	0.0525781	-0.00442403	0.96189	7.40203e-05	0.00129085	6.3977e-05	5.50507e-07	0	7.32976e+06		0.0606938	2918.42	2.00365	1.9357	13.0972	0.131243	1.90278	0.260451	0.136221	1498.64	0.062493	0.0149011	0.00275162	0.00834695	0.226116	0.0180323	0.0817777	0.000466647	0.00326922	0.000265884	1.19492e-05	0	1.03639e+06	0.0101156
92c9	9	0.0638373	665.552	4.06353	12.9475	12.3533	0.0629627	2.70353	1.77113	1.45711	1601.57	0.0510697	0.00376238	0.00378624	0.209089	0.520854	-0.00241441	1.24475	0.000132385	0.00324313	0.000242002	-3.8175e-07	6.77953e-06	8.43335e+06		0.0439366	3350.64	1.12303	0.992839	1.63836	0.0895182	2.21425	0.465473	0.0830781	1242.47	0.0264288	0.00937359	0.00390836	0.440063	1.10511	0.0095856	0.179889	0.000583151	0.00172267	0.000543274	3.16936e-08	2.62303e-05	804236	0.00878733
92c18	18	0.0709199	134.807	7.93843	19.8844	18.7818	0.00667358	1.36811	0.491777	1.49322	1140.52	0.0830122	0.0109704	0.00459614	0.0824209	0.165279	-0.00453631	1.11696	0.000108512	0.00484322	0.000170118	7.10897e-06	7.29449e-06	7.5854e+06		0.0647588	2517.66	2.6879	4.49755	3.80528	0.0314767	1.67151	0.236284	0.150346	1084.11	0.0414155	0.021273	0.00264035	0.0301832	0.0676019	0.0125874	0.395822	0.000719702	0.0026165	0.000404339	3.73011e-05	3.81888e-05	1.55546e+06	0.0109462
92c19	19	0.0660619	461.959	3.57976	5.66601	5.60371	0.055101	1.00115	0.201626	1.43821	1180.31	0.0464971	0.00604288	0.00312464	0.02782	0.0508714	-0.00360734	0.972122	-4.88007e-05	0.00055602	0.000268258	5.6427e-06	1.84799e-06	7.84527e+06		0.0499259	3228.66	0.700474	0.672145	0.796499	0.141985	1.93463	0.113154	0.180422	1235.95	0.0194873	0.0105117	0.00239575	0.0240222	0.0542617	0.0155491	0.115823	9.03189e-06	0.00048966	0.000653014	4.91919e-05	1.16549e-05	1.5025e+06	0.009271
92c20	20	0.0661036	728.03	5.28317	8.08441	7.88374	0.00954756	1.21275	0.281458	1.45359	801.876	0.0513029	0.00622135	0.00310406	0.0123518	0.0157206	-0.00301754	0.836791	3.01301e-05	0.000430446	7.95889e-05	1.02334e-05	0	7.72011e+06		0.0494717	2248.47	0.735643	0.571886	0.636737	0.0723968	2.50909	0.104512	0.100494	994.198	0.0267359	0.0126772	0.00198669	0.00411639	0.0567231	0.0151682	0.0608902	0.000332262	0.000451823	0.000271778	7.15978e-05	0	789455	0.00970219
92c21	21	0.0663092	399.578	6.98693	14.4906	13.9037	0.00300128	1.49008	0.139013	1.48136	977.603	0.0652221	0.00534508	0.00323237	0.0358946	0.450168	0.000396207	0.900894	0.000102929	0.00243654	0.00018794	0	0	7.28662e+06		0.0576119	2733.64	1.89238	2.49595	2.58162	0.0455243	1.95405	0.0733082	0.163954	1374.16	0.0303537	0.0133726	0.00249532	0.0793372	1.28612	0.0182511	0.201174	0.000668103	0.00110621	0.000546899	0	0	1.71603e+06	0.00922528
57x13	13	0.0644577	55.0173	4.48006	9.00033	9.09236	-0.00490242	0.891426	0.227956	1.44071	702.479	0.0368653	0.00403915	0.00166969	0.00732199	0.00453854	-0.000353587	0.746769	0.000120761	0.00301187	3.19816e-05	0	1.1543e-05	6.80026e+06		0.0530642	2978.19	2.2228	2.13135	2.80233	0.0368288	2.1296	0.114999	0.222168	993.037	0.0293078	0.0128913	0.00167051	0.00944924	0.0151719	0.0158407	0.231557	0.000956025	0.00137657	0.000169855	0	4.3442e-05	1.96881e+06	0.00629756
57x14	14	0.0546846	414.482	3.72424	5.0008	5.06865	-0.00171553	0.917838	0.0464996	1.45522	627.732	0.0270587	0.000813478	0.000851364	0.0008891	0.000188801	0.000885423	0.708296	-7.79414e-05	0.000979373	3.52161e-05	2.66843e-06	6.08302e-07	6.62027e+06		0.0468309	3262.97	1.10817	1.30055	1.29973	0.0387518	2.17056	0.0552054	0.165675	1136.2	0.0237188	0.00917609	0.00136005	0.00140916	0.00271584	0.0157098	0.204378	0.000225815	0.000747424	0.000189542	1.96929e-05	7.19753e-06	1.87928e+06	0.00551908
57x15	15	0.0566786	255.693	4.6025	11.6259	11.621	0.0254958	1.01111	0.12198	1.42267	768.143	0.0465509	0.00372756	0.0014797	0.00558633	0.00832503	-0.00174568	0.766278	-1.34957e-05	0.0027032	4.4297e-06	0	2.03431e-06	6.83178e+06		0.0463722	3423.45	1.64246	2.32869	3.08628	0.0864505	1.84335	0.0736495	0.225217	1183.24	0.0357997	0.0122469	0.00164825	0.0057195	0.0310333	0.0117385	0.216205	0.000450831	0.00162737	7.93551e-05	0	1.42205e-05	2.16396e+06	0.00550337
90A9	9	0.0761602	149.931	7.4369	13.9229	13.0992	-0.00335631	1.30543	0.101944	1.37677	2228.33	0.0647751	0.00215615	0.00243595	0.0366053	0.00430288	-0.0055338	0.715913	7.70485e-05	0.00107209	0.000167606	-1.15518e-06	1.46413e-06	7.75645e+06		0.0526804	2307.39	1.34884	2.82674	3.04991	0.0355637	2.07822	0.0654327	0.275616	7607.98	0.019596	0.00821489	0.0023633	0.0137433	0.00501286	0.0232563	0.163745	0.000553347	0.00086701	0.000469314	7.73767e-06	1.16721e-05	2.1641e+06	0.00730545
90A10	10	0.0729528	552.703	5.72938	10.3694	9.76867	-0.00183361	1.68222	0.0984597	1.38189	786.14	0.0465052	0.00154061	0.00185004	0.0251834	0.00354864	-0.00647026	0.856915	5.78955e-05	0.00137622	0.000188719	2.25403e-06	7.26343e-07	7.58928e+06		0.0580551	2325.26	1.01271	2.10786	1.0502	0.0286355	2.17274	0.0650687	0.13387	1249.8	0.0222277	0.00808791	0.00172429	0.0113951	0.00308524	0.021961	0.139472	0.000745032	0.000735508	0.00050227	1.86465e-05	6.57541e-06	1.77513e+06	0.00782815
92c29	29	0.0404711	1117.27	3.99014	7.4647	7.31786	0.00297979	0.810138	0.103681	1.48065	618.366	0.0324299	0.00232525	0.00107887	0.0105543	0.0320158	-0.000957415	0.9618	9.32997e-05	0.0020408	-1.65789e-06	4.13085e-06	0	7.55526e+06		0.0424616	3205.21	0.812862	1.60664	1.69048	0.0379021	2.02576	0.0644224	0.0942471	1234.52	0.0228057	0.0111971	0.00119118	0.00464465	0.0286083	0.0183738	0.167896	0.000541397	0.0011127	2.38851e-07	4.38657e-05	0	942231	0.00739161
92c30	30	0.0443754	427.829	4.05465	7.73281	7.62747	0.00421585	0.91286	0.141427	1.4693	573.127	0.0266878	0.00207915	0.00150065	0.0158281	0.0455242	-3.73821e-05	0.824646	0.000156918	0.00135618	0	1.25912e-06	0	7.17631e+06		0.0458483	3536.23	0.744731	1.92524	1.33243	0.036503	1.69025	0.121053	0.177583	1246.66	0.0260698	0.00964165	0.00191885	0.0069774	0.0135409	0.0142175	0.133619	0.00119569	0.0007937	0	1.25912e-05	0	1.10389e+06	0.00798116
92c31	31	0.0753576	714.501	8.50741	18.0997	17.427	0.105567	0.856207	0.116421	1.49317	754.616	0.0633124	0.00253437	0.00272527	0.00590203	0.0049502	0.000416917	1.12301	0.000129942	0.000947542	5.51034e-05	2.63886e-06	0	7.02805e+06		0.0428001	3162.63	1.01001	1.61008	1.66484	0.384211	1.82113	0.0869333	0.180591	1249.12	0.0252821	0.00980229	0.00201266	0.00388661	0.00566842	0.0191603	0.123675	0.000790825	0.00056045	0.000306124	2.5311e-05	0	1.14929e+06	0.00703629
90bB8	8	0.0965156	767.686	6.4894	55.2141	61.0459	0.331075	2.90758	4.66131	1.59979	1886.83	0.130365	0.0437073	0.011385	1.23194	0.547087	0.00223183	1.59705	0.000188978	0.0516849	0.0202632	1.83816e-05	0.00055514	7.02876e+06		0.0610496	2898.44	1.20871	8.812	8.06745	0.39499	3.80433	0.787795	0.128816	1614.23	0.0506352	0.0487759	0.00378859	0.272537	0.197844	0.0187413	0.164568	0.000971202	0.0208219	0.00756286	9.3534e-05	0.000470886	1.0582e+06	0.00953435
90bB9	9	0.0921029	765.451	5.7819	44.1377	46.8713	2.11243	6.87884	2.09597	1.55627	1763.47	0.506306	0.143799	0.0121353	0.457914	0.772854	0.00194477	1.32206	0.000236776	0.0290516	0.00594461	7.00237e-05	0.000241027	6.66016e+06		0.059772	3771.5	1.48872	13.3025	16.2636	1.3602	4.20178	0.700446	0.293164	1569.93	0.316622	0.158033	0.00633562	0.140662	0.378711	0.0155605	0.232123	0.00103438	0.00793234	0.00355569	0.000278326	0.000211561	1.71916e+06	0.00821032
90bB10	10	0.0855996	-143.337	5.91932	26.5894	28.5754	0.284629	1.81356	1.10073	1.5697	944.221	0.126485	0.0196658	0.004697	0.169097	0.125239	0.000684786	1.17401	4.49779e-05	0.0155844	0.00231317	1.14495e-05	7.17412e-05	6.94305e+06		0.0563643	3549.93	1.49156	24.08	28.2709	0.476923	3.60077	1.15895	0.153918	1321.64	0.091615	0.0274809	0.00459092	0.210951	0.185493	0.0159474	0.235309	0.000367174	0.0173319	0.00235734	6.91177e-05	0.000103079	1.05002e+06	0.00926623
90bB11	11	0.0823974	331.063	6.72773	32.0766	33.1479	0.444837	2.88316	1.59581	1.61002	1009.44	0.168141	0.022	0.00468479	0.243675	0.186992	0.00151895	1.18872	2.95997e-05	0.0201062	0.00300688	4.26428e-06	9.93755e-05	7.53236e+06		0.043193	3565.02	0.76963	6.68649	8.70318	0.726674	3.91277	0.522466	0.118812	1300.33	0.242436	0.0378651	0.00315107	0.0694303	0.239747	0.0132421	0.0737302	0.000427687	0.00504427	0.00220675	2.25189e-05	0.000155727	785255	0.00900637
[truncated: 88 more columns]

## Sheet: icpoes
SAMPLE NAME	EXPEDITION	SITE	HOLE	CORE	CORE_TYPE	SECTION	TOP_DEPTH	BOTTOM_DEPTH	MBSF_TOP	PXRD mineralogy	comments	CaCO3 (wt%)	Ca (wt%)	Mg/Ca (mmol/mol)	Sr/Ca (mmol/mol)	Na/Ca (mmol/mol)	Mn/Ca (mmol/mol)	Fe/Ca (mmol/mol)	S/Ca (mmol/mol)	P/Ca (mmol/mol)	Al/Ca (mmol/mol)	Rb/Ca (mmol/mol)
mlv gl 57, 97	396	1567	C	11	X	1	83	93	82.03	Calcite, halite, Qz		86.6906	34.7137	25.8972	1.48917	22.4023	2.17273	1.95869	3.63907	11.3669	1.17881	0.0174103	THIS STUDY
mlv gl 88	396	1568	A	15	X	4	55	58	102.05	Calcite, Qz, rhodochrosite		75.379	30.1842	37.4165	1.3726	13.871	8.44035	165.382	4.17529	3.55839	3.06379	0.0317111	THIS STUDY
mlv gl 90	396	1569	A	19	R	2	54	62	177.25	calcite, Mg-calcite, Qz, gypsum, halite		88.2515	35.3387	42.3022	1.20478	15.3742	0.380791	1.62516	5.45017	1.52519	1.41814	0.0137009	THIS STUDY
mlv gl 100	396	1569	A	19	R	2	54	62	177.25	CaCO3, Mg-calcite, Qz	cemented middle part	88.2877	35.3532	51.5381	1.06936	10.6761	1.60542	2.55426	2.0515	2.26597	3.87333	0.0427766	THIS STUDY
mlv gl 92	396	1570	A	15	R	1	108	112	94.48	Caclite, minor Qz + halite		89.1738	35.7081	19.9245	1.18821	16.6792	0.791475	11.3222	1.95898	1.78993	1.81188	0.0288634	THIS STUDY
mlv gl 93	396	1570	A	25	R	1	50	55	142.5	Calcite, Mg-calcite, Qz	bulk	85.1012	34.0772	50.6765	1.28821	11.43	3.82936	38.3205	1.66869	6.84802	4.68677	0.0124393	THIS STUDY
mlv gl 98	396	1570	A	25	R	1	50	55	142.5	Calcite	white, cemented part	90.3099	36.163	40.8217	1.81528	6.87533	3.36158	11.5528	0.763759	12.8048	0.438384	0.00637449	THIS STUDY
mlv gl 99	396	1570	A	25	R	1	50	55	142.5	Calcite, minor quartz	grey, speckled hard part	83.2495	33.3358	44.3584	1.09934	7.32027	3.30246	37.9741	0.864372	3.74516	4.39746	0.0430353	THIS STUDY

## Sheet: 1567C ash microprobe
		Oxide
	Sample	SiO2	TiO2	Al2O3	FeO	MnO	MgO	CaO	Na2O	K2O	Cr2O3	SO3	Cl	Cl ppm	S ppm	Total
77 / 1 .	67C_5X_113-115	49.4126	0.8386	13.5807	11.4342	0.2187	7.5504	12.8541	2.0281	0.043	0.0323	0.1249	0.0352		500	98.1528
78 / 1 .	67C_5X_113-115	48.9024	0.8237	13.5385	10.9506	0.2167	7.9536	13.3724	1.958	0.0632	0.0497	0.0849	0.0434		340	97.9571
79 / 1 .	67C_5X_113-115	49.3993	0.7112	13.6333	10.9495	0.176	8.0517	13.3833	1.9126	0.0509	0.0622	0.1174	0.0213		470	98.4687
80 / 1 .	67C_5X_113-115	49.6547	0.9293	13.6725	11.7722	0.2507	7.6153	12.7068	2.1223	0.0423	0.0819	0.1598	0.0508		640	99.0586
81 / 1 .	67C_5X_113-115	49.1119	0.8302	13.6466	11.3034	0.2681	7.3994	13.3618	1.945	0.0319	0.0422	0.1697	0.0475		680	98.1576
82 / 1 .	67C_5X_113-115	49.6755	0.8354	13.7576	11.3566	0.2123	7.6345	13.1054	2.1299	0.0485	0.0248	0.1848	0.0459		740	99.0111
83 / 1 .	67C_5X_113-115	49.4307	0.869	13.6402	11.321	0.1844	7.8458	13.2402	2.0116	0.0294	0.0273	0.1323	0.0524		530	98.7845
84 / 1 .	67C_5X_113-115	49.1957	0.8332	13.401	11.6224	0.1779	7.4441	13.202	2.0342	0.0386	0.0025	0.1547	0.0295		620	98.1358
85 / 1 .	67C_5X_113-115	49.7357	0.8986	13.5355	11.5272	0.2273	7.516	12.9851	2.0403	0.0473	0.0497	0.1424	0.0696		570	98.7747
86 / 1 .	67C_5X_113-115	49.1329	0.747	13.2218	11.415	0.2144	7.639	12.8242	2.1103	0.0313	0.0695	0.1774	0.0278		710	97.6106
87 / 1 .	67C_5X_113-115	49.3692	0.7488	13.2613	11.4701	0.2015	7.7793	12.9567	2.0698	0.0454	0.0497	0.1399	0.0631		560	98.1547
88 / 1 .	67C_5X_113-115	48.916	0.8606	13.8849	10.9531	0.2317	8.0688	13.145	1.9493	0.0325	0.0348	0.0849	0.0442		340	98.2058
89 / 1 .	67C_5X_113-115	49.5619	0.7767	13.7943	10.9282	0.1997	8.2586	13.5544	2.0062	0.0368	0.0423	0.1074	0.0229		430	99.2895
90 / 1 .	67C_5X_113-115	49.3759	0.7521	13.4717	11.6042	0.2851	7.7298	12.9603	2.0521	0.0393	0.072	0.1224	0.0385		490	98.5032
91 / 1 .	67C_5X_113-115	49.2879	0.7948	13.5532	11.564	0.2187	7.6041	13.3591	2.0785	0.057	0.0397	0.2321	0.0442		929	98.8332
92 / 1 .	67C_5X_113-115	49.3741	0.7476	13.5739	11.1167	0.2232	7.922	12.8289	2.0385	0.051	0.0447	0.125	0.0393		501	98.085
61 / 1 .	67C_5X_113-115_ab500	49.6714	0.8057	13.5943	11.5123	0.2929	7.4849	13.0299	2.1255	0.0161	0.0361	0.1525	0.0444		611	98.7661
62 / 1 .	67C_5X_113-115_ab500	50.2858	0.7795	13.5166	11.5427	0.245	7.6828	12.7626	1.9978	0.0297	0.0288	0.1815	0.0373		727	99.0903
63 / 1 .	67C_5X_113-115_ab500	50.1959	0.8562	13.3012	11.5487	0.2989	7.4849	13.1503	2.1333	0.0558	0.0096	0.1088	0.0555		436	99.1991
64 / 1 .	67C_5X_113-115_ab500	49.8499	0.7775	13.4953	11.7062	0.2241	7.6912	12.8045	2.0589	0.0374	0.0529	0.1766	0.0531		707	98.9277
65 / 1 .	67C_5X_113-115_ab500	49.4916	0.8407	13.5337	11.5161	0.2055	7.3889	12.7608	2.1317	0.0333	0.0336	0.1379	0.0397		552	98.1134
66 / 1 .	67C_5X_113-115_ab500	49.7213	0.8343	13.4341	11.3496	0.2284	7.5821	13.0122	2.0002	0.0428	0.0313	0.1185	0.0396		475	98.3943
67 / 1 .	67C_5X_113-115_ab500	49.2966	0.6614	14.3038	10.6085	0.2121	8.4279	12.8779	1.8985	0.0524	0.041	0.143	0.031		572	98.554
68 / 1 .	67C_5X_113-115_ab500	50.25	0.8617	13.5819	11.4067	0.1786	7.6438	12.9987	1.9973	0.0113	0.1323	0.1355	0.0278		543	99.2256
69 / 1 .	67C_5X_113-115_ab500	49.6966	0.8458	13.5053	11.5398	0.2241	7.6954	12.9379	2.1022	0.0214	0.0697	0.1233	0.0373		494	98.7987
67C_5X_113-115_ab500	Mean	49.5198	0.810384	13.5773	11.3608	0.22464	7.72377	13.047	2.03728	0.039544	0.046424	0.141504	0.041652		566.68	98.5701
	Median	49.4307	0.8302	13.5532	11.4342	0.2187	7.6438	12.9987	2.0385	0.0393	0.0422	0.1379	0.0397		552	98.554
	Pos error	0.8551	0.0991	0.7506	0.338	0.0802	0.7841	0.5557	0.0948	0.0239	0.0901	0.0942	0.0299		377	0.7355
	Neg error	0.5283	0.1688	0.3314	0.8257	0.0427	0.2549	0.2919	0.14	0.028	0.0397	0.053	0.0184		212	0.9434
62 / 1 .	67C_9X_38-40	48.9936	1.7844	13.4315	11.4089	0.1607	7.0121	12.3898	2.1441	0.304	0.0348	0.0623	0.0147		250	97.7411
63 / 1 .	67C_9X_38-40	48.7506	2.365	13.5674	12.3635	0.2245	6.8167	11.3173	2.4711	0.34	0.0668	0.0274	0.0163		110	98.3266
64 / 1 .	67C_9X_38-40	48.0393	2.2824	13.4007	12.5227	0.2373	6.9021	11.5676	2.4233	0.2944	0.0346	0.0473	0.0008		189	97.7525
65 / 1 .	67C_9X_38-40	48.7114	2.3612	13.6333	12.4121	0.0963	6.7217	11.3699	2.4645	0.3101	0.0247	0.0848	0.0114		339	98.2014
66 / 1 .	67C_9X_38-40	48.6731	2.2887	13.5834	11.9978	0.2076	6.6298	11.3817	2.3782	0.3053	0.0099	0.1022	0.0221		409	97.5797
67 / 1 .	67C_9X_38-40	49.9291	2.5748	12.9748	12.3851	0.1796	5.9776	10.4814	2.6068	0.537	0.0049	0.0474	0.0147		190	97.7133
68 / 1 .	67C_9X_38-40	49.3697	0.725	13.7056	10.9497	0.2146	7.766	13.1077	1.8332	0.0939	0.0348	0.045	-0.0049		180	97.8452
69 / 1 .	67C_9X_38-40	50.2254	0.6456	13.733	11.0345	0.2618	7.7388	13.1527	1.7451	0.0712	0.0846	0.0425	0.0098		170	98.7451
70 / 1 .	67C_9X_38-40	49.287	3.0314	12.7656	14.1819	0.228	4.9542	9.7987	2.8573	0.7065	0.0098	0.0149	0.0245		60	97.8597
71 / 1 .	67C_9X_38-40	48.2843	2.3685	13.3389	12.4009	0.2266	6.7156	11.3576	2.5018	0.3313	0.0297	0.0573	-0.0106		229	97.6124
73 / 1 .	67C_9X_38-40	48.5341	2.3516	13.3394	12.8051	0.1966	6.6146	11.3912	2.3912	0.3258	0.0247	0.0448	0.0082		180	98.0273
74 / 1 .	67C_9X_38-40	48.4613	2.2981	13.2908	12.2987	0.1946	6.7859	11.5478	2.3959	0.283	0.0594	0.0374	-0.0065		150	97.6529
75 / 1 .	67C_9X_38-40	47.6361	2.4186	13.4801	12.1954	0.2074	6.809	11.5314	2.4354	0.3061	0.0148	0.0349	0.0049		140	97.0741
76 / 1 .	67C_9X_38-40	48.2144	2.2653	13.7516	12.0883	0.2781	6.6323	11.6185	2.3995	0.2928	0.0594	0.0772	0.0253		309	97.7028
67C_9X_38-40	Mean	48.7935	2.12576	13.4283	12.2175	0.208121	6.71974	11.5724	2.36053	0.321529	0.0352071	0.0518143	0.00933571		207.5	97.8453
	Median	48.6923	2.32485	13.4558	12.3311	0.2111	6.7538	11.4613	2.4114	0.3057	0.03215	0.04615	0.0106		184.5	97.7468
	Pos error	1.53315	0.70655	0.2958	1.8508	0.067	1.0122	1.6914	0.4459	0.4008	0.05245	0.05605	0.0147		224.5	0.9983
	Neg error	1.05615	1.67925	0.6902	1.3814	0.1148	1.7996	1.6626	0.6663	0.2345	0.02725	0.03125	0.0212		124.5	0.6727
1 / 1 .	67C_11X_45-46	50.3047	2.5735	13.4794	9.9734	0.1997	7.2775	11.743	2.2097	0.3379	0.0499	0.0924	0.0188		370	98.26
2 / 1 .	67C_11X_45-46	49.5822	2.0464	12.4721	10.8595	0.2338	9.5781	11.2723	2.1998	0.3197	0.097	0.1125	0.0008		451	98.7741
3 / 1 .	67C_11X_45-46	49.9492	2.3583	13.1668	10.4901	0.148	7.279	11.9506	2.2899	0.3609	0.0871	0.0674	0.0164		270	98.1635
4 / 1 .	67C_11X_45-46	50.3678	2.4986	13.7335	10.1481	0.2125	7.1089	11.8503	2.2888	0.3329	0.0798	0.1074	0.0049		430	98.7334
5 / 1 .	67C_11X_45-46	49.9307	2.5216	13.4627	9.9097	0.1503	7.268	12.024	2.2657	0.3205	0.0424	0.0724	0.0287		290	97.9968
6 / 1 .	67C_11X_45-46	50.2461	2.4599	13.5048	9.9887	0.1804	7.2195	11.9396	2.3854	0.3084	0.0848	0.0575	0.0238		230	98.399
7 / 1 .	67C_11X_45-46	49.8158	2.6667	13.3924	10.2989	0.1975	6.9195	11.5507	2.3507	0.3495	0.0299	0.1074	0.0115		430	97.6904
8 / 1 .	67C_11X_45-46	50.2398	2.6101	13.3934	10.5167	0.1824	7.3766	11.6975	2.248	0.35	0.0299	0.04	0.0025		160	98.6868
9 / 1 .	67C_11X_45-46	49.5311	2.4503	13.0466	10.2943	0.176	7.8953	11.5878	2.2253	0.3366	0.0548	0.0799	0.009		320	97.687
11 / 1 .	67C_11X_45-46	50.0162	2.4506	13.37	10.4292	0.1631	7.142	11.8316	2.357	0.4218	0.0523	0.0225	0.0221		90	98.2785
12 / 1 .	67C_11X_45-46	49.9151	2.5176	13.1079	10.4868	0.1374	7.5295	11.9549	2.2331	0.3474	0.0349	0.0449	0.0123		180	98.3217
13 / 1 .	67C_11X_45-46	50.0425	2.465	12.9558	10.1232	0.146	7.7124	11.7861	2.2819	0.3472	0.0598	0.095	0.0098		380	98.0247
14 / 1 .	67C_11X_45-46	50.2085	2.6972	13.2868	10.1419	0.1009	7.5846	11.9231	2.2634	0.3519	0.0948	0.0524	0.0188		210	98.7242
15 / 1 .	67C_11X_45-46	49.9063	2.5219	13.3443	10.6624	0.2017	7.6305	12.0186	2.3096	0.3615	0.0821	0.0524	0.0196		210	99.1109
16 / 1 .	67C_11X_45-46	49.6732	2.1787	12.5968	10.6323	0.1524	8.5494	11.4778	2.2413	0.3362	0.0075	0.155	0.0188		621	98.0194
57 / 1 .	67C_11X_45-46	49.6228	2.4277	12.9384	10.5973	0.131	7.9702	11.5473	2.2115	0.3405	0.117	0.045	0.0172		180	97.9659
58 / 1 .	67C_11X_45-46	49.8426	2.5024	13.2355	10.154	0.1676	7.3664	11.7977	2.3101	0.3423	0.0998	0.09	0.018		360	97.9263
59 / 1 .	67C_11X_45-46	50.2989	2.6005	13.4575	10.3563	0.1482	6.6174	11.748	2.4743	0.3583	0.0673	0.05	0.0016		200	98.1783
60 / 1 .	67C_11X_45-46	50.1127	2.558	13.0808	10.2484	0.1396	6.8279	11.5404	2.3073	0.37	0.0848	0.07	0.0238		280	97.3636
67C_11X_45-46	Mean	49.9793	2.47921	13.2119	10.3322	0.166763	7.51856	11.7495	2.28699	0.347026	0.0661	0.0744263	0.0146526		298	98.2266
	Median	49.9492	2.5024	13.2868	10.2989	0.1631	7.3664	11.7861	2.2819	0.3472	0.0673	0.07	0.0172		280	98.1783
	Pos error	0.4186	0.1948	0.4467	0.5606	0.0707	2.2117	0.2379	0.1924	0.0746	0.0497	0.085	0.0115		341	0.9326
	Neg error	0.4181	0.456	0.8147	0.3892	0.0622	0.749	0.5138	0.0821	0.0388	0.0598	0.0475	0.0164		190	0.8147
17 / 1 .	68A_11X_10-14	49.6393	0.9468	13.5127	12.06	0.2332	7.4938	12.4866	1.9883	0.0569	0.0649	0.1284	0.0594		514	98.6702
18 / 1 .	68A_11X_10-14	49.5576	0.7917	13.7158	11.774	0.1858	7.6282	12.9321	1.9341	0.0439	-0.0475	0.1007	0.0454		403	98.7093
19 / 1 .	68A_11X_10-14	49.3657	0.6059	14.3632	10.0393	0.2579	8.5742	13.6328	1.8045	0.0378	0.1182	0.0227	0.0025		91	98.8247
21 / 1 .	68A_11X_10-14	49.9595	0.9451	13.5581	12.111	0.244	7.5301	12.6452	1.953	0.0532	0.0525	0.1284	0.0536		514	99.2335
22 / 1 .	68A_11X_10-14	52.5446	1.2328	13.148	11.9932	0.1922	5.6284	10.1143	2.6463	0.5628	0.0399	0.1492	0.1905		597	98.4423
23 / 1 .	68A_11X_10-14	49.7287	0.9026	13.47	12.1622	0.2462	7.5512	12.7208	1.9459	0.0254	0.0375	0.141	0.071		564	99.0024
24 / 1 .	68A_11X_10-14	49.4743	0.61	14.4888	9.9273	0.1799	8.8409	13.9195	1.8222	-0.0031	0.0655	0.0378	0.0264		151	99.3927
25 / 1 .	68A_11X_10-14	49.355	0.7925	14.1475	10.5476	0.1668	8.2036	13.7033	1.8306	0.0526	0.0729	0.0982	0.0058		393	98.9762
26 / 1 .	68A_11X_10-14	49.43	0.8035	13.6366	11.1818	0.2768	7.565	13.4011	1.9504	0.0377	0.0476	0.1082	0.0149		433	98.4535
27 / 1 .	68A_11X_10-14	51.1432	2.8066	13.1081	12.1892	0.1876	4.9026	9.3605	3.0173	0.8272	-0.0175	0.0302	0.0165		121	97.5891
28 / 1 .	68A_11X_10-14	49.7311	0.9268	13.4417	11.5406	0.2593	7.2672	12.6754	1.9861	0.0965	0.0325	0.0605	-0.0025		242	98.0176
29 / 1 .	68A_11X_10-14	49.9745	0.789	13.1835	12.2753	0.2548	7.7527	12.6561	1.9704	0.0439	0.0375	0.1385	0.0578		555	99.1339
30 / 1 .	68A_11X_10-14	50.0587	0.9138	13.4916	12.0143	0.2095	7.8046	12.8939	2.0032	0.0396	0.0525	0.1234	0.0503		494	99.6554
68A_11X_10-14	Mean	49.9971	1.00516	13.6358	11.5243	0.222615	7.44173	12.5494	2.06556	0.144185	0.0428077	0.0974769	0.0455077		390.154	98.777
	Median	49.7287	0.9026	13.5127	11.9932	0.2332	7.565	12.7208	1.953	0.0439	0.0476	0.1082	0.0454		433	98.8247
	Pos error	2.8159	1.904	0.9761	0.2821	0.0436	1.2759	1.1987	1.0643	0.7833	0.0706	0.041	0.1451		164	0.8307
	Neg error	0.3737	0.2967	0.4046	2.0659	0.0664	2.6624	3.3603	0.1485	0.047	0.0951	0.0855	0.0479		342	1.2356
31 / 1 .	68A_14X_99-100	49.4206	0.7086	13.5372	10.7368	0.1992	8.1135	13.8564	1.9537	0.0328	0.0427	0.0428	0.033		171	98.6773
32 / 1 .	68A_14X_99-100	50.1536	0.7588	13.4364	11.3981	0.2768	7.7655	13.0787	2.0982	0.047	0.0501	0.194	0.0372		777	99.2944
33 / 1 .	68A_14X_99-100	48.5934	1.9759	13.4667	12.1646	0.1812	6.9292	12.2123	2.46	0.2747	0.0949	0.0402	0		161	98.3932
34 / 1 .	68A_14X_99-100	49.9477	0.6797	13.5696	11.0745	0.1255	7.9575	13.4771	1.7922	0.0526	0.0577	0.1612	0.0355		646	98.9309
35 / 1 .	68A_14X_99-100	49.3152	0.9182	13.8461	10.8276	0.2186	8.0979	13.6831	1.9683	0.0526	0.0452	0.1737	0.0206		695	99.1671
36 / 1 .	68A_14X_99-100	49.6802	0.712	13.5728	10.8162	0.1862	8.3448	13.3849	1.8135	0.0458	0.0151	0.0807	0.0074		323	98.6596
37 / 1 .	68A_14X_99-100	49.9166	0.788	13.7845	11.278	0.0995	8.1792	13.44	1.8705	0.0291	0.0351	0.1386	0.005		555	99.564
38 / 1 .	68A_14X_99-100	48.6183	2.227	13.47	12.2942	0.2459	6.8058	11.5391	2.5536	0.304	0.0649	0.1005	0.0033		402	98.2265
39 / 1 .	68A_14X_99-100	48.9397	2.2962	13.5331	12.4211	0.1898	6.829	11.7278	2.5218	0.3138	0.0649	0.0678	0.0091		272	98.9142
40 / 1 .	68A_14X_99-100	48.3327	1.6131	13.4608	12.2805	0.2416	6.9245	12.285	2.6294	0.1161	0.0424	0.1432	0.0247		573	98.0941
41 / 1 .	68A_14X_99-100	48.6704	2.0698	13.2455	12.109	0.2223	6.9049	11.9679	2.4612	0.2563	0.0325	0.0503	0.0124		201	98.0024
42 / 1 .	68A_14X_99-100	49.4491	0.7207	13.7568	10.9946	0.2099	8.1501	13.4848	1.8638	0.0489	0.0276	0.1033	0.0363		414	98.8458
43 / 1 .	68A_14X_99-100	49.278	2.5836	13.6602	12.1933	0.2373	6.4425	10.7436	2.572	0.3428	-0.0225	0.0352	0.019		141	98.1075
44 / 1 .	68A_14X_99-100	50.0051	0.659	13.6774	10.6647	0.1949	8.0369	13.657	1.8432	0.0365	0.0452	0.0353	0.0248		141	98.88
45 / 1 .	68A_14X_99-100	49.5901	0.6558	13.6026	10.4584	0.221	8.1649	13.8388	1.8172	0.0328	0.0352	0.0882	0.0182		353	98.5232
46 / 1 .	68A_14X_99-100	49.2643	0.5592	13.6595	10.7174	0.2143	8.119	13.9757	1.8974	0.039	0.0578	0.0151	0.0239		60	98.5425
80 / 1 .	68A_14X_99-100_ab500	49.9537	0.7164	13.8238	10.8471	0.1435	8.2264	13.7082	1.8827	0.0339	0.0289	0.0823	0.0119		329	99.4586
81 / 1 .	68A_14X_99-100_ab500	49.8921	0.7071	13.3923	11.2256	0.2244	7.9442	13.4829	1.851	0.0398	0.0361	0.1354	0.0278		542	98.9587
82 / 1 .	68A_14X_99-100_ab500	49.3572	0.7092	13.4426	10.9834	0.1829	8.1315	13.4918	1.8293	0.0333	0.0434	0.1137	0.0016		455	98.3197
83 / 1 .	68A_14X_99-100_ab500	49.6629	0.6831	13.8059	11.2541	0.2888	7.8363	13.5227	1.8266	0.0327	0.0048	0.1765	0.0309		707	99.1252
68A_14X_99-100_ab500	Mean	49.402	1.13707	13.5872	11.337	0.20518	7.69518	13.0279	2.07528	0.108225	0.0401	0.0989	0.01913		395.9	98.7342
	Median	49.4348	0.71855	13.5712	11.1501	0.2121	7.9972	13.48	1.89005	0.0464	0.04255	0.09435	0.0198		377.5	98.7615
	Pos error	0.71875	1.86505	0.2749	1.27105	0.0767	0.3476	0.4957	0.73935	0.2964	0.05235	0.09965	0.0174		399.5	0.80245
	Neg error	1.10215	0.15935	0.3257	0.69165	0.1126	1.5547	2.7364	0.09785	0.0173	0.06505	0.07925	0.0198		317.5	0.75915
1 / 1 .	69A_23R_20-22	47.4113	3.6024	12.497	14.9424	0.3168	5.1997	10.1999	2.7696	0.6588	-0.0372	0.0427	0.0165		171	97.6571
2 / 1 .	69A_23R_20-22	48.1654	3.6882	12.5721	14.4134	0.2201	5.2042	9.823	2.7565	0.6069	0.0448	0.0755	0.0091		302	97.5791
3 / 1 .	69A_23R_20-22	48.0999	3.7342	12.3877	14.3498	0.2115	5.1836	10.2331	2.8344	0.6213	0.0224	0.1131	0.019		453	97.8101
4 / 1 .	69A_23R_20-22	48.4548	3.6311	12.568	14.7446	0.2222	5.2866	10.1306	2.8615	0.6431	0.0323	0.1031	0.0198		413	98.6977
5 / 1 .	69A_23R_20-22	47.8211	3.4635	12.4996	14.5147	0.218	5.2726	10.157	2.8252	0.6259	-0.0149	0.0956	0.0264		383	97.5195
6 / 1 .	69A_23R_20-22	48.9451	3.5422	12.4017	14.2637	0.2333	5.3886	10.1866	2.7658	0.635	-0.0523	0.073	0.0099		292	98.445
7 / 1 .	69A_23R_20-22	48.0723	3.6469	12.4034	14.6141	0.2827	5.178	10.0352	2.8994	0.635	0.0274	0.0905	0.0107		362	97.8956
8 / 1 .	69A_23R_20-22	47.9816	3.6131	12.4621	14.3285	0.2763	5.2939	10.3166	2.8597	0.6356	0.01	0.1232	0.0016		493	97.9023
9 / 1 .	69A_23R_20-22	48.0398	3.6027	12.1939	14.7281	0.2934	5.3369	10.2029	2.8007	0.6391	-0.0124	0.1357	0.0223		543	97.9956
10 / 1 .	69A_23R_20-22	48.7246	3.6453	12.2952	14.4584	0.2677	5.2879	9.9147	2.7588	0.6084	0.0647	0.0529	0.0107		212	98.0893
11 / 1 .	69A_23R_20-22	48.0804	3.6645	12.2334	14.4659	0.2309	5.2089	10.0272	2.7906	0.6538	0.0025	0.1031	0.0231		413	97.4842
13 / 1 .	69A_23R_20-22	47.7573	3.6169	12.3475	14.5075	0.2417	5.3707	10.0407	2.72	0.6457	-0.0124	0.1308	0.0214		524	97.4003
14 / 1 .	69A_23R_20-22	49.0794	3.3646	12.3721	14.4281	0.2051	5.0575	9.8163	3.0623	0.7292	-0.0124	0.0831	0.0083		333	98.2061
15 / 1 .	69A_23R_20-22	48.1055	3.6139	12.291	14.3905	0.2504	5.3203	10.0135	2.9104	0.6255	0.0473	0.0855	0.0025		343	97.6564
16 / 1 .	69A_23R_20-22	47.85	3.6343	12.3898	14.4828	0.2504	5.2466	9.987	2.8369	0.6488	0.0249	0.0956	0.0016		383	97.4487
17 / 1 .	69A_23R_20-22	48.275	3.7161	12.1977	14.4433	0.1728	5.2809	10.1277	2.8243	0.641	-0.0199	0.1283	0.0215		514	97.8285
18 / 1 .	69A_23R_20-22	48.1528	3.6343	12.2399	14.3964	0.2354	5.1922	10.0855	2.8814	0.6181	0.0299	0.1132	0.0058		453	97.5848
19 / 1 .	69A_23R_20-22	47.8545	3.6219	12.2986	14.5537	0.2612	5.2959	10.4015	2.7601	0.63	-0.0373	0.093	0.0148		372	97.7853
20 / 1 .	69A_23R_20-22	48.4156	3.6323	12.44	14.679	0.2288	5.2521	9.9211	2.823	0.63	0.0274	0.1082	0.0173		433	98.1748
69A_23R_20-22	Mean	48.173	3.61413	12.3732	14.5108	0.243089	5.25564	10.0853	2.82845	0.638484	0.00709474	0.0971632	0.0138053		389.053	97.8505
	Median	48.0999	3.6311	12.3877	14.4659	0.2354	5.2726	10.0855	2.8243	0.635	0.01	0.0956	0.0148		383	97.8101
	Pos error	0.9795	0.1031	0.1844	0.4765	0.0814	0.116	0.316	0.238	0.0942	0.0547	0.0401	0.0116		160	0.8876
	Neg error	0.6886	0.2665	0.1938	0.2022	0.0626	0.2151	0.2692	0.1043	0.0281	0.0623	0.0529	0.0132		212	0.4098
21 / 1 .	69A_25R_13-15	48.1439	4.0351	12.0548	15.0455	0.2135	4.8327	9.7641	2.7863	0.7276	0.0224	0.103	0.0165		413	97.7453
22 / 1 .	69A_25R_13-15	48.5954	4.2847	11.889	15.5038	0.2974	4.7896	9.675	2.6189	0.8114	0.0422	0.1506	0.0222		603	98.6803
23 / 1 .	69A_25R_13-15	48.8231	4.3693	11.7507	15.582	0.2392	4.5091	9.8761	2.5728	0.8232	-0.0347	0.1631	0.0082		653	98.7168
24 / 1 .	69A_25R_13-15	48.1967	3.7831	12.0839	14.899	0.2201	4.9167	9.9384	2.8579	0.785	-0.0348	0.1257	0.0247		503	97.8313
25 / 1 .	69A_25R_13-15	48.0468	4.0799	12.0528	15.1836	0.2631	4.9826	9.7511	2.7155	0.7282	0.0248	0.1583	0.0255		634	98.0121
26 / 1 .	69A_25R_13-15	48.6472	3.8836	12.1223	15.1133	0.3429	4.8145	9.6995	2.7028	0.8103	0.0149	0.0754	0.0239		302	98.2507
27 / 1 .	69A_25R_13-15	48.0271	4.0023	12.1832	15.026	0.248	4.8243	9.7419	2.6729	0.742	-0.0075	0.1659	0.0107		664	97.6443
28 / 1 .	69A_25R_13-15	48.1821	3.8918	11.9404	15.1161	0.2868	4.7033	9.4832	2.7229	0.7999	0.005	0.0729	0.019		292	97.2233
29 / 1 .	69A_25R_13-15	48.4798	4.2377	12.2913	15.5596	0.2221	4.9135	9.9368	2.7373	0.7805	0.0348	0.2184	0.0165		875	99.4282
30 / 1 .	69A_25R_13-15	47.9585	3.9781	12.0898	15.4695	0.2393	4.8135	9.7444	2.6757	0.7707	0.0248	0.1231	0.0231		493	97.9103
31 / 1 .	69A_25R_13-15	48.2612	4.1783	11.9997	15.3786	0.207	4.7252	9.7684	2.8031	0.754	-0.005	0.1281	0.0239		513	98.2274
32 / 1 .	69A_25R_13-15	48.0912	3.8762	12.2629	14.9692	0.2524	4.9135	9.5965	2.7445	0.8193	0.0298	0.171	0.0148		685	97.7415
33 / 1 .	69A_25R_13-15	48.4634	4.1402	11.9835	15.1623	0.2695	4.4459	9.2435	2.79	0.8532	0.0074	0.1508	0.0165		604	97.5263
34 / 1 .	69A_25R_13-15	48.773	3.8209	12.2774	14.6074	0.2743	4.808	9.806	2.8237	0.8223	0.0672	0.2264	0.0008		907	98.3075
35 / 1 .	69A_25R_13-15	48.353	3.9163	11.9695	14.8903	0.246	4.7068	9.7254	2.7935	0.805	0.0273	0.2162	0.0223		866	97.6715
36 / 1 .	69A_25R_13-15	48.2666	3.9765	11.9891	15.2844	0.2501	4.6961	9.3184	2.6742	0.7963	0.0223	0.1634	0.0173		654	97.4547
37 / 1 .	69A_25R_13-15	47.9955	3.8971	12.0285	14.9316	0.2891	4.7729	9.7034	2.7937	0.7497	0.0944	0.1156	0.014		463	97.3855
38 / 1 .	69A_25R_13-15	48.2768	3.7867	12.1537	14.847	0.2935	4.7652	9.8236	2.8507	0.8076	0.0348	0.1835	0.0256		735	97.8487
39 / 1 .	69A_25R_13-15	47.9748	3.9795	12.1093	15.3734	0.1768	4.7955	9.6512	2.7683	0.7303	-0.0298	0.1433	0.0124		574	97.7148
40 / 1 .	69A_25R_13-15	48.3995	3.9246	12.1552	14.4631	0.2095	4.8878	9.5205	2.7217	0.7574	0.0149	0.1334	0.0281		534	97.2157
69A_25R_13-15	Mean	48.2978	4.00209	12.0694	15.1203	0.25203	4.78083	9.68837	2.74132	0.783695	0.01776	0.149405	0.0183		598.35	97.9268
	Median	48.2639	3.9773	12.0694	15.1147	0.24905	4.80175	9.73365	2.7409	0.79065	0.02235	0.1507	0.01815		603.5	97.7883
	Pos error	0.5592	0.392	0.22195	0.4673	0.09385	0.18085	0.20475	0.117	0.06255	0.07205	0.0757	0.00995		303.5	1.6399
	Neg error	0.3054	0.1942	0.31865	0.6516	0.07225	0.35585	0.49015	0.1681	0.06305	0.05715	0.0778	0.01735		311.5	0.5726
41 / 1 .	69A_28R_74-76	47.4977	4.3263	12.4627	15.0422	0.2352	4.9531	10.0742	2.707	0.8569	0.0199	0.1355	0.0173		543	98.3279
42 / 1 .	69A_28R_74-76	47.1656	4.5221	12.1825	15.0628	0.2006	4.6313	9.6285	3.0325	0.8551	0.0571	0.2258	0.0305		904	97.5945
43 / 1 .	69A_28R_74-76	47.0672	4.3238	12.3333	14.5729	0.2612	5.0509	9.7998	2.9574	0.8311	-0.0075	0.216	0.019		865	97.4326
44 / 1 .	69A_28R_74-76	47.4202	4.2165	12.4302	14.9579	0.302	4.8288	10.0454	2.983	0.842	0.0323	0.0477	0.014		191	98.1201
45 / 1 .	69A_28R_74-76	47.0328	4.3397	12.3429	14.7052	0.287	4.9076	9.997	3.0203	0.7933	0.005	0.1405	0.0338		563	97.605
46 / 1 .	69A_28R_74-76	47.0366	4.4532	12.1486	15.1837	0.2264	4.6868	9.4302	3.1719	0.8547	0.0124	0.1631	0.0181		653	97.3857
47 / 1 .	69A_28R_74-76	48.909	3.5127	12.6269	14.4432	0.2528	4.7752	9.8282	2.7723	0.6147	0.0224	0.1033	0.0182		414	97.8789
48 / 1 .	69A_28R_74-76	48.127	4.4189	12.4913	14.7628	0.2461	4.9652	9.8636	2.8322	0.864	0.0473	0.1306	0.0223		523	98.7713
49 / 1 .	69A_28R_74-76	47.0153	4.2431	12.3871	14.7119	0.218	5.0427	9.7986	2.9812	0.8767	-0.0099	0.1582	0.0321		633	97.4649
50 / 1 .	69A_28R_74-76	46.6401	4.4479	12.3858	14.6473	0.1813	4.9311	9.7268	3.0697	0.8258	0.005	0.1958	0.0338		784	97.0903
51 / 1 .	69A_28R_74-76	47.6319	4.5061	12.2507	14.6089	0.2569	4.8307	9.7618	3.0688	0.8587	0.0199	0.123	0.0124		493	97.9298
52 / 1 .	69A_28R_74-76	49.1141	3.5539	12.5389	14.7514	0.2527	4.8564	9.5135	2.8683	0.6261	-0.0199	0.1538	0.0306		616	98.2596
53 / 1 .	69A_28R_74-76	47.1082	4.4344	12.2392	14.8129	0.2611	5.0096	9.852	2.9854	0.8245	0.0298	0.2434	0.0354		975	97.836
54 / 1 .	69A_28R_74-76	47.5253	4.2678	12.4966	14.84	0.2784	5.0581	9.9091	3.0094	0.8112	0.0199	0.1658	0.0181		664	98.3996
55 / 1 .	69A_28R_74-76	47.0527	4.5971	12.3593	14.9892	0.2179	4.7606	9.614	3.0381	0.8664	0.0522	0.1681	0.0453		673	97.7608
56 / 1 .	69A_28R_74-76	46.8827	4.207	12.3124	14.6916	0.2612	4.9768	9.8615	2.9068	0.7969	-0.005	0.1632	0.0198		654	97.0801
57 / 1 .	69A_28R_74-76	47.4815	4.8282	12.2982	15.1901	0.2157	4.6212	9.8127	2.8711	0.9117	0.0174	0.1705	0.0239		683	98.4421
58 / 1 .	69A_28R_74-76	47.1308	4.39	12.2891	14.6274	0.2892	4.9259	9.933	3.0017	0.8232	-0.0324	0.1506	0.0189		603	97.58
59 / 1 .	69A_28R_74-76	47.3845	4.488	12.4003	15.0796	0.2395	4.7543	10.0403	2.8772	0.8654	0.0298	0.2207	0.0469		884	98.4265
60 / 1 .	69A_28R_74-76	47.2154	4.446	12.3454	15.0572	0.2848	4.8605	10.1463	3.0617	0.8016	0.0348	0.1856	0.0214		743	98.4608
69A_28R_74-76	Mean	47.4219	4.32613	12.3661	14.8369	0.2484	4.87134	9.83182	2.9608	0.82	0.016525	0.16306	0.02559		653.05	97.8923
	Median	47.1905	4.40445	12.3523	14.7879	0.25275	4.88405	9.8401	2.9842	0.83655	0.0199	0.16315	0.02185		653.5	97.8575
	Pos error	1.9236	0.42375	0.27455	0.40225	0.04925	0.17405	0.3062	0.1877	0.07515	0.0372	0.08025	0.02505		321.5	0.91385
	Neg error	0.5504	0.89175	0.20375	0.34465	0.07145	0.26285	0.4099	0.2772	0.22185	0.0523	0.11545	0.00945		462.5	0.77735

## Sheet: 396 ash thicknesses
Site	Hole	Core	Type	Sect	Recovered length (m)	Curated length (m)	Top depth CSF-A (m)	Bottom depth CSF-A (m)	Top depth CSF-B (m)	Bottom depth CSF-B (m)	Ash thickness per section		Thickness of section	ash cm/m
1568	A	6	H	1	1.51	1.51	41.9	43.41	41.9	43.397		0	1.51	0
1568	A	6	H	2	1.5	1.5	43.41	44.91	43.397	44.885		0	1.5	0
1568	A	6	H	3	1.51	1.51	44.91	46.42	44.885	46.382		0	1.51	0
1568	A	6	H	4	1.5	1.5	46.42	47.92	46.382	47.869		0	1.5	0
1568	A	6	H	5	1.52	1.52	47.92	49.44	47.869	49.377		0	1.52	0
1568	A	6	H	6	1.4	1.4	49.44	50.84	49.377	50.765		0	1.4	0
1568	A	6	H	7	0.57	0.57	50.84	51.41	50.765	51.33		0	0.57	0
1568	A	6	H	CC	0.07	0.07	51.41	51.48	51.33	51.4		0	0.07	0
1568	A	7	H	CC	0.3	0.3	51.4	51.7	51.4	51.7		0	0.3	0
1568	A	8	X	1	1.5	1.5	51.7	53.2	51.7	53.2	0.049	4.9	1.5	3.26667
1568	A	8	X	2	1.5	1.5	53.2	54.7	53.2	54.7	0.006	0.6	1.5	0.4
1568	A	8	X	3	1.49	1.49	54.7	56.19	54.7	56.19		0	1.49	0
1568	A	8	X	4	0.57	0.57	56.19	56.76	56.19	56.76		0	0.57	0
1568	A	8	X	CC	0.37	0.37	56.76	57.13	56.76	57.13		0	0.37	0
1568	A	9	X	1	1.5	1.5	58.2	59.7	58.2	59.586	0.004	0.4	1.5	0.266667
1568	A	9	X	2	1.5	1.5	59.7	61.2	59.586	60.971	0.268	26.8	1.5	17.8667
1568	A	9	X	3	0.86	0.86	61.2	62.06	60.971	61.765		0	0.86	0
1568	A	9	X	4	0.73	0.73	62.06	62.79	61.765	62.44	0.09	9	0.73	12.3288
1568	A	9	X	CC	0.39	0.39	62.79	63.18	62.44	62.8		0	0.39	0
1568	A	10	X	1	1.5	1.5	62.8	64.3	62.8	64.189		0	1.5	0
1568	A	10	X	2	1.49	1.49	64.3	65.79	64.189	65.568	0.015	1.5	1.49	1.00671
1568	A	10	X	3	1.43	1.43	65.79	67.22	65.568	66.892	0.017	1.7	1.43	1.18881
1568	A	10	X	4	0.51	0.51	67.22	67.73	66.892	67.365		0	0.51	0
1568	A	10	X	CC	0.47	0.47	67.73	68.2	67.365	67.8		0	0.47	0
1568	A	11	X	1	1.5	1.5	67.8	69.3	67.8	69.3		0	1.5	0
1568	A	11	X	2	1.5	1.5	69.3	70.8	69.3	70.8	0.026	2.6	1.5	1.73333
1568	A	11	X	3	1.09	1.09	70.8	71.89	70.8	71.89	0.415	41.5	1.09	38.0734
1568	A	11	X	CC	0.29	0.29	71.89	72.18	71.89	72.18	0.055	5.5	0.29	18.9655
1568	A	12	X	1	1.49	1.49	72.4	73.89	72.4	73.89	0.309	30.9	1.49	20.7383
1568	A	12	X	2	1.5	1.5	73.89	75.39	73.89	75.39	0.012	1.2	1.5	0.8
1568	A	12	X	3	1.14	1.14	75.39	76.53	75.39	76.53	0.019	1.9	1.14	1.66667
1568	A	12	X	4	0.51	0.51	76.53	77.04	76.53	77.04	0	0	0.51	0
1568	A	12	X	CC	0.22	0.22	77.04	77.26	77.04	77.26	0	0	0.22	0
1568	A	13	X	1	1.5	1.5	77.4	78.9	77.4	78.9	0.067	6.7	1.5	4.46667
1568	A	13	X	2	1.5	1.5	78.9	80.4	78.9	80.4	0.642	64.2	1.5	42.8
1568	A	13	X	3	1.51	1.51	80.4	81.91	80.4	81.91	0.053	5.3	1.51	3.50993
1568	A	13	X	4	1.5	1.5	81.91	83.41	81.91	83.41	0.072	7.2	1.5	4.8
1568	A	13	X	5	1.5	1.5	83.41	84.91	83.41	84.91	0.018	1.8	1.5	1.2
1568	A	13	X	6	1.38	1.38	84.91	86.29	84.91	86.29	0.072	7.2	1.38	5.21739
1568	A	13	X	7	0.52	0.52	86.29	86.81	86.29	86.81	0.066	6.6	0.52	12.6923
1568	A	13	X	CC	0.31	0.31	86.81	87.12	86.81	87.12	0	0	0.31	0
1568	A	14	X	1	1.5	1.5	87.2	88.7	87.2	88.7	0.075	7.5	1.5	5
1568	A	14	X	2	1.5	1.5	88.7	90.2	88.7	90.2	0.082	8.2	1.5	5.46667
1568	A	14	X	3	1.49	1.49	90.2	91.69	90.2	91.69	0.029	2.9	1.49	1.94631
1568	A	14	X	4	1.5	1.5	91.69	93.19	91.69	93.19	0.06	6	1.5	4
1568	A	14	X	5	1.5	1.5	93.19	94.69	93.19	94.69	0.048	4.8	1.5	3.2
1568	A	14	X	6	1.37	1.37	94.69	96.06	94.69	96.06	0	0	1.37	0
1568	A	14	X	CC	0.4	0.4	96.06	96.46	96.06	96.46	0	0	0.4	0
1568	A	15	X	1	1.5	1.5	97	98.5	97	98.5	0.15	15	1.5	10
1568	A	15	X	2	1.5	1.5	98.5	100	98.5	100	0.025	2.5	1.5	1.66667
1568	A	15	X	3	1.5	1.5	100	101.5	100	101.5	0.054	5.4	1.5	3.6
1568	A	15	X	4	1.23	1.23	101.5	102.73	101.5	102.73	0	0	1.23	0
1568	A	15	X	5	0.51	0.51	102.73	103.24	102.73	103.24	0	0	0.51	0
1568	A	15	X	CC	0.46	0.46	103.24	103.7	103.24	103.7	0.027	2.7	0.46	5.86957
1568	A	16	X	1	1.5	1.5	106.8	108.3	106.8	108.3	0.168	16.8	1.5	11.2
1568	A	16	X	2	1.5	1.5	108.3	109.8	108.3	109.8	0	0	1.5	0
1568	A	16	X	3	1.5	1.5	109.8	111.3	109.8	111.3	0	0	1.5	0
1568	A	16	X	4	1.12	1.12	111.3	112.42	111.3	112.42	0	0	1.12	0
1568	A	16	X	5	0.52	0.52	112.42	112.94	112.42	112.94	0	0	0.52	0
1568	A	16	X	CC	0.44	0.44	112.94	113.38	112.94	113.38	0	0	0.44	0
1568	A	17	X	1	1.49	1.49	116.6	118.09	116.6	118.078	0.033	3.3	1.49	2.21477
1568	A	17	X	2	1.51	1.51	118.09	119.6	118.078	119.576	0.016	1.6	1.51	1.0596
1568	A	17	X	3	1.51	1.51	119.6	121.11	119.576	121.073	0	0	1.51	0
1568	A	17	X	4	1.51	1.51	121.11	122.62	121.073	122.571	0	0	1.51	0
1568	A	17	X	5	1.5	1.5	122.62	124.12	122.571	124.059	0	0	1.5	0
1568	A	17	X	6	1.45	1.45	124.12	125.57	124.059	125.497	0	0	1.45	0
1568	A	17	X	7	0.52	0.52	125.57	126.09	125.497	126.013	0	0	0.52	0
1568	A	17	X	CC	0.39	0.39	126.09	126.48	126.013	126.4	0	0	0.39	0
1568	A	18	X	1	1.51	1.51	126.4	127.91	126.4	127.91	0	0	1.51	0
1568	A	18	X	2	1.5	1.5	127.91	129.41	127.91	129.41	0.008	0.8	1.5	0.533333
1568	A	18	X	3	1.5	1.5	129.41	130.91	129.41	130.91	0	0	1.5	0
1568	A	18	X	4	1.51	1.51	130.91	132.42	130.91	132.42	0.045	4.5	1.51	2.98013
1568	A	18	X	5	1.22	1.22	132.42	133.64	132.42	133.64	0	0	1.22	0
1568	A	18	X	CC	0.33	0.33	133.64	133.97	133.64	133.97	0	0	0.33	0
1568	A	19	X	1	1.5	1.5	136.1	137.6	136.1	137.6	0	0	1.5	0
1568	A	19	X	2	1.5	1.5	137.6	139.1	137.6	139.1	0	0	1.5	0
1568	A	19	X	3	0.95	0.95	139.1	140.05	139.1	140.05	0	0	0.95	0
1568	A	19	X	CC	0.37	0.37	140.05	140.42	140.05	140.42	0	0	0.37	0
1568	A	20	X	1	1.5	1.5	145.8	147.3	145.8	147.3	0	0	1.5	0
1568	A	20	X	2	1.5	1.5	147.3	148.8	147.3	148.8	0	0	1.5	0
1568	A	20	X	3	0.78	0.78	148.8	149.58	148.8	149.58	0	0	0.78	0
1568	A	20	X	CC	0.39	0.39	149.58	149.97	149.58	149.97	0	0	0.39	0
1568	A	21	X	1	1.51	1.51	155.5	157.01	155.5	157.01	0	0	1.51	0
1568	A	21	X	2	0.95	0.95	157.01	157.96	157.01	157.96	0	0	0.95	0
1568	A	21	X	CC	0.57	0.57	157.96	158.53	157.96	158.53	0	0	0.57	0
1568	A	22	X	1	1.5	1.5	165.3	166.8	165.3	166.8	0	0	1.5	0
1568	A	22	X	2	1.05	1.05	166.8	167.85	166.8	167.85	0	0	1.05	0
1568	A	22	X	CC	0.32	0.32	167.85	168.17	167.85	168.17	0	0	0.32	0
1568	A	23	X	1	1.49	1.49	169.2	170.69	169.2	170.69	0	0	1.49	0
1568	A	23	X	2	0.61	0.61	170.69	171.3	170.69	171.3	0	0	0.61	0
1568	A	23	X	CC	0.21	0.21	171.3	171.51	171.3	171.51	0	0	0.21	0
1568	A	24	X	1	1.5	1.5	175	176.5	175	176.5	0	0	1.5	0
1568	A	24	X	2	1.34	1.34	176.5	177.84	176.5	177.84	0	0	1.34	0
1568	A	24	X	CC	0.24	0.24	177.84	178.08	177.84	178.08	0	0	0.24	0
1568	A	25	X	1	1.39	1.39	179.7	181.09	179.7	181.09	0	0	1.39	0
1568	A	25	X	2	0.56	0.56	181.09	181.65	181.09	181.65	0	0	0.56	0
1568	A	25	X	CC	0.23	0.23	181.65	181.88	181.65	181.88	0	0	0.23	0
1568	A	26	X	CC	0.29	0.29	184.7	184.99	184.7	184.99	0	0	0.29	0
1568	A	27	X	1	1.51	1.51	189.5	191.01	189.5	190.924	0	0	1.51	0
1568	A	27	X	2	1.5	1.5	191.01	192.51	190.924	192.338	0	0	1.5	0
1568	A	27	X	3	1.08	1.08	192.51	193.59	192.338	193.357	0	0	1.08	0
1568	A	27	X	4	0.53	0.53	193.59	194.12	193.357	193.857	0	0	0.53	0
1568	A	27	X	CC	0.47	0.47	194.12	194.59	193.857	194.3	0	0	0.47	0
1568	A	28	X	1	0.89	0.89	194.3	195.19	194.3	195.19	0	0	0.89	0
1568	A	28	X	CC	0.4	0.4	195.19	195.59	195.19	195.59	0	0	0.4	0
Site	Hole	Core	Type	Sect	Recovered length (m)	Curated length (m)	Top depth CSF-A (m)	Bottom depth CSF-A (m)	Top depth CSF-B (m)	Bottom depth CSF-B (m)	Thickness	Ash thickness per section		Thickness of section	ash cm/m
1569	A	21	R	1	1.42	1.42	195.2	196.62	195.2	196.62	0.01	0.01	1	1.42	0.704225
1569	A	21	R	2	0.77	0.77	196.62	197.39	196.62	197.39		0	0	0.77	0
1569	A	21	R	CC	0.28	0.28	197.39	197.67	197.39	197.67		0	0	0.28	0
1569	A	22	R	1	1.23	1.23	205	206.23	205	206.23	0.007	0.007	0.7	1.23	0.569106
1569	A	22	R	CC	0.29	0.29	206.23	206.52	206.23	206.52		0	0	0.29	0
1569	A	23	R	1	1.12	1.12	214.8	215.92	214.8	215.92		0	0	1.12	0
1569	A	23	R	2	0.96	0.96	215.92	216.88	215.92	216.88	0.008	0.028	2.8	0.96	2.91667
1569	A	23	R	3	0.71	0.71	216.88	217.59	216.88	217.59	0.007	0.007	0.7	0.71	0.985915
1569	A	23	R	CC	0.22	0.22	217.59	217.81	217.59	217.81	0.015	0.015	1.5	0.22	6.81818
1569	A	24	R	1	1.02	1.02	224.6	225.62	224.6	225.62	0.035	0.181	18.1	1.02	17.7451
1569	A	24	R	2	0.99	0.99	225.62	226.61	225.62	226.61	0.016	0.207	20.7	0.99	20.9091
1569	A	24	R	CC	0.17	0.17	226.61	226.77	226.61	226.77	0.009	0.018	1.8	0.16	11.25
1569	A	25	R	1	1.06	1.06	234.3	235.36	234.3	235.36			0	1.06	0
1569	A	25	R	CC	0.21	0.21	235.36	235.57	235.36	235.57			0	0.21	0
1569	A	26	R	CC	0.11	0.11	244.1	244.21	244.1	244.21			0	0.11	0
1569	A	27	R	1	1.5	1.5	253.9	255.4	253.9	255.4	0.035	0.035	3.5	1.5	2.33333
1569	A	27	R	2	1.47	1.47	255.4	256.87	255.4	256.87	0.013	0.055	5.5	1.47	3.7415
1569	A	27	R	3	1.16	1.16	256.87	258.03	256.87	258.03	0.031	0.031	3.1	1.16	2.67241
1569	A	27	R	CC	0.12	0.12	258.03	258.15	258.03	258.15	0.01	0.01	1	0.12	8.33333
1569	A	28	R	1	1.4	1.4	263.7	265.1	263.7	265.1	0.009	0.294	29.4	1.4	21
1569	A	28	R	2	1.1	1.1	265.1	266.2	265.1	266.2	0.01	0.023	2.3	1.1	2.09091
1569	A	28	R	CC	0.21	0.21	266.2	266.41	266.2	266.41	0.037	0.057	5.7	0.21	27.1429
1569	A	29	R	1	1.32	1.32	273.5	274.82	273.5	274.82	0.015	0.148	14.8	1.32	11.2121
1569	A	29	R	CC	0.16	0.16	274.82	274.98	274.82	274.98	0.05	0.05	5	0.16	31.25
1569	A	30	R	1	1.25	1.25	283.3	284.55	283.3	284.55	0.009	0.284	28.4	1.25	22.72
1569	A	30	R	CC	0.19	0.19	284.55	284.74	284.55	284.74	0.039	0.066	6.6	0.19	34.7368
1569	A	31	R	1	1.15	1.15	293.1	294.25	293.1	294.25	0.105	0.297	29.7	1.15	25.8261
1569	A	31	R	CC	0.19	0.19	294.25	294.44	294.25	294.44	0.01	0.01	1	0.19	5.26316
1569	A	32	R	1	1.51	1.51	298	299.51	298	299.51	0.079	0.714	71.4	1.51	47.2848
1569	A	32	R	2	0.94	0.94	299.51	300.45	299.51	300.45	0.029	0.538	53.8	0.94	57.234
1569	A	32	R	CC	0.19	0.19	300.45	300.64	300.45	300.64	0.023	0.023	2.3	0.19	12.1053
1569	A	33	R	1	1.1	1.1	302.9	304	302.9	304	0.085	0.375	37.5	1.1	34.0909
1569	A	33	R	CC	0.11	0.11	304	304.11	304	304.11	0.01	0.01	1	0.11	9.09091
1569	A	34	R	1	1.5	1.5	307.8	309.3	307.8	309.3	0.031	0.089	8.9	1.5	5.93333
1569	A	34	R	2	1.04	1.04	309.3	310.34	309.3	310.34	0.018	0.067	6.7	1.04	6.44231
1569	A	34	R	3	0.52	0.52	310.34	310.86	310.34	310.86	0.122	0.222	22.2	0.52	42.6923
1569	A	34	R	CC	0.17	0.17	310.86	311.03	310.86	311.03	0.07	0.07	7	0.17	41.1765
1569	A	35	R	1	1.51	1.51	312.7	314.21	312.7	314.21			0	1.51	0
1569	A	35	R	2	1.45	1.45	314.21	315.66	314.21	315.66	0.022	0.022	2.2	1.45	1.51724
1569	A	35	R	CC	0.13	0.13	315.66	315.79	315.66	315.79			0	0.13	0
1569	A	36	R	1	1.49	1.49	322.5	323.99	322.5	323.99	0.015	0.036	3.6	1.49	2.41611
1569	A	36	R	2	1.49	1.49	323.99	325.48	323.99	325.48			0	1.49	0
1569	A	36	R	3	1.51	1.51	325.48	326.99	325.48	326.99	0.023	0.088	8.8	1.51	5.82781
1569	A	36	R	4	0.92	0.92	326.99	327.91	326.99	327.91			0	0.92	0
Site	Hole	Core	Type	Sect	Recovered length (m)	Curated length (m)	Top depth CSF-A (m)	Bottom depth CSF-A (m)	Top depth CSF-B (m)	Bottom depth CSF-B (m)	Thickness				Thickness of section	ash cm/m
1570	A	7	R	1	1.34	1.34	54.5	55.84	54.5	55.84	0.122	0.122	0.164	16.4	1.34	12.2388
1570	A	7	R	2	0.52	0.52	55.84	56.36	55.84	56.36	0.03	0.03	0.03	3	0.52	5.76923
1570	A	7	R	CC	0.17	0.17	56.36	56.53	56.36	56.53				0	0.17	0
1570	A	8	R	1	1.39	1.39	59.3	60.69	59.3	60.69	0.078	0.078	0.125	12.5	1.39	8.99281
1570	A	8	R	2	0.52	0.52	60.69	61.21	60.69	61.21				0	0.52	0
1570	A	8	R	CC	0.19	0.19	61.21	61.4	61.21	61.4				0	0.19	0
1570	A	9	R	1	1.38	1.38	64.2	65.58	64.2	65.58	0.002	0.002	0.011	1.1	1.38	0.797101
1570	A	9	R	2	0.75	0.75	65.58	66.33	65.58	66.33	0.018	0.018	0.022	2.2	0.75	2.93333
1570	A	9	R	CC	0.14	0.14	66.33	66.47	66.33	66.47				0	0.14	0
1570	A	10	R	1	1.07	1.07	69.1	70.17	69.1	70.17	0.006	0.006	0.187	18.7	1.07	17.4766
1570	A	10	R	CC	0.24	0.24	70.17	70.41	70.17	70.41				0	0.24	0
1570	A	11	R	1	1.46	1.46	74	75.46	74	75.46	0.042	0.042	0.067	6.7	1.46	4.58904
1570	A	11	R	2	1.31	1.31	75.46	76.77	75.46	76.77	0.022	0.022	0.037	3.7	1.31	2.82443
1570	A	11	R	CC	0.16	0.16	76.77	76.93	76.77	76.93	0.02	0.02	0.02	2	0.16	12.5
1570	A	12	R	1	1.13	1.13	78.8	79.93	78.8	79.93	0.011	0.011	0.078	7.8	1.13	6.90265
1570	A	12	R	2	0.52	0.52	79.93	80.45	79.93	80.45	0.014	0.014	0.076	7.6	0.52	14.6154
1570	A	12	R	CC	0.1	0.1	80.45	80.55	80.45	80.55				0	0.1	0
1570	A	13	R	1	1.47	1.47	83.7	85.17	83.7	85.17	0.025	0.025	0.057	5.7	1.47	3.87755
1570	A	13	R	2	1.03	1.03	85.17	86.2	85.17	86.2	0.006	0.006	0.182	18.2	1.03	17.6699
1570	A	13	R	3	0.58	0.58	86.2	86.78	86.2	86.78	0.032	0.032	0.088	8.8	0.58	15.1724
1570	A	13	R	CC	0.28	0.28	86.78	87.06	86.78	87.06	0.029	0.029	0.059	5.9	0.28	21.0714
1570	A	14	R	1	1.39	1.39	88.5	89.89	88.5	89.89	0.029	0.029	0.227	22.7	1.39	16.3309
1570	A	14	R	2	1.06	1.06	89.89	90.95	89.89	90.95	0.008	0.008	0.044	4.4	1.06	4.15094
1570	A	14	R	3	0.61	0.61	90.95	91.56	90.95	91.56	0.025	0.025	0.116	11.6	0.61	19.0164
1570	A	14	R	CC	0.2	0.2	91.56	91.76	91.56	91.76				0	0.2	0
1570	A	15	R	1	1.42	1.42	93.4	94.82	93.4	94.82	0.008	0.008	0.16	16	1.42	11.2676
1570	A	15	R	2	1.05	1.05	94.82	95.87	94.82	95.87	0.058	0.058	0.139	13.9	1.05	13.2381
1570	A	15	R	CC	0.16	0.16	95.87	96.03	95.87	96.03				0	0.16	0
1570	A	16	R	1	1.41	1.41	98.2	99.61	98.2	99.61	0.025	0.025	0.193	19.3	1.41	13.6879
1570	A	16	R	2	1.47	1.47	99.61	101.08	99.61	101.08	0.153	0.153	0.313	31.3	1.47	21.2925
1570	A	16	R	3	1	1	101.08	102.08	101.08	102.08	0.01	0.01	0.082	8.2	1	8.2
1570	A	16	R	CC	0.16	0.16	102.08	102.24	102.08	102.24				0	0.16	0
1570	A	17	R	1	1.49	1.49	103.1	104.59	103.1	104.59	0.032	0.032	0.185	18.5	1.49	12.4161
1570	A	17	R	2	1.17	1.17	104.59	105.76	104.59	105.76	0.017	0.017	0.056	5.6	1.17	4.78632
1570	A	17	R	3	0.85	0.85	105.76	106.61	105.76	106.61	0.039	0.039	0.039	3.9	0.85	4.58824
1570	A	17	R	CC	0.16	0.16	106.61	106.77	106.61	106.77				0	0.16	0
1570	A	18	R	1	1.41	1.41	107.9	109.31	107.9	109.31	0.006	0.006	0.052	5.2	1.41	3.68794
1570	A	18	R	2	1.36	1.36	109.31	110.67	109.31	110.67	0.019	0.019	0.019	1.9	1.36	1.39706
1570	A	18	R	CC	0.26	0.26	110.67	110.93	110.67	110.93				0	0.26	0
1570	A	19	R	1	0.89	0.89	112.8	113.62	112.8	113.62				0	0.82	0
1570	A	19	R	CC	0.05	0.05	113.62	113.67	113.62	113.67				0	0.05	0
1570	A	20	R	1	1.2	1.2	117.7	118.9	117.7	118.9	0.021	0.021	0.021	2.1	1.2	1.75
1570	A	20	R	2	1.37	1.37	118.9	120.27	118.9	120.27	0.008	0.008	0.008	0.8	1.37	0.583942
1570	A	20	R	CC	0.14	0.14	120.27	120.41	120.27	120.41				0	0.14	0
1570	A	21	R	1	0.23	0.23	122.6	122.83	122.6	122.83				0	0.23	0
1570	A	21	R	CC	0.05	0.05	122.83	122.88	122.83	122.88				0	0.05	0
1570	A	22	R	1	0.96	0.96	127.4	128.36	127.4	128.36	0.005	0.005	0.01	1	0.96	1.04167
1570	A	22	R	2	1.5	1.5	128.36	129.86	128.36	129.86	0.004	0.004	0.062	6.2	1.5	4.13333
1570	A	22	R	CC	0.17	0.17	129.86	130.03	129.86	130.03				0	0.17	0
1570	A	23	R	1	1.48	1.48	132.3	133.78	132.3	133.78	0.008	0.008	0.008	0.8	1.48	0.540541
1570	A	23	R	2	0.98	0.98	133.78	134.76	133.78	134.76				0	0.98	0
1570	A	23	R	CC	0.16	0.16	134.76	134.92	134.76	134.92				0	0.16	0
1570	A	24	R	1	1.5	1.5	137.1	138.6	137.1	138.6	0.008	0.008	0.186	18.6	1.5	12.4
1570	A	24	R	2	1.51	1.51	138.6	140.11	138.6	140.11	0.038	0.038	0.059	5.9	1.51	3.90728
1570	A	24	R	CC	0.31	0.31	140.11	140.42	140.11	140.42	0.078	0.078	0.086	8.6	0.31	27.7419
1570	A	25	R	1	1.5	1.5	142	143.5	142	143.5	0.02	0.02	0.03	3	1.5	2

## Sheet: d13C 1570D
EXPEDITION	SITE	HOLE	CORE	CORE_TYPE	SECTION	CC	TOP_DEPTH	BOTTOM_DEPTH	VOLUME	MBSF_TOP	depth	δ13C (‰ vs. VPDB)																									x
396	U1570	D	11	R	CC		13	15		87.54	-87.54	-26.8182		Clipt lab
396	1570	D	12	R	2	no	32	33	5	92.2	-92.2	-27.3		Hawaii
396	1570	D	12	R	2	no	52	53	5	92.4	-92.4	-27.3
396	U1570	D	12	R	CC		5	10		92.54	-92.54	-26.7653
396	1570	D	13	R	1	no	19	21	5	95.89	-95.89	-26.8
396	U1570	D	13	R	CC		0	2		95.91	-95.91	-26.851
396	U1570	D	14	R	1	W	5	6		100.65	-100.65	-26.3747
396	1570	D	16	R	2	no	57	58	5	111.4	-111.4	-26.8
396	1570	D	16	R	2	no	137	138	5	112.2	-112.2	-26.5
396	1570	D	16	R	3	no	8	9	5	112.4	-112.4	-26.4
396	1570	D	16	R	3	no	46	47	5	112.78	-112.78	-26.5
396	1570	D	16	R	4	yes	3	4	5	113	-113	-26.8
396	U1570	D	16	R	CC		17	19		113.14	-113.14	-26.8184
396	1570	D	17	R	1	no	0	1	5	115.2	-115.2	-27.1
396	1570	D	17	R	1	no	60	61	5	115.8	-115.8	-26.8771
396	1570	D	17	R	1	no	80	81	5	116	-116	-26.7
396	1570	D	17	R	2	no	39	40	5	117	-117	-26.4
396	1570	D	17	R	2	no	79	80	5	117.4	-117.4	-26.6
396	1570	D	17	R	3	no	5	6	5	117.8	-117.8	-26.7
396	1570	D	17	R	3	no	45	46	5	118.2	-118.2	-26.8
396	1570	D	17	R	4	yes	16	18	10	118.54	-118.54	-27.3
396	U1570	D	17	R	CC		25	27		118.63	-118.63	-26.9483
396	1570	D	18	R	1	no	30	31	5	120.4	-120.4	-26.7
396	1570	D	18	R	1	no	70	71	5	120.8	-120.8	-26.7
396	1570	D	18	R	2	no	7	8	5	121.57	-121.57	-26.9
396	1570	D	18	R	2	no	70	71	5	122.2	-122.2	-26.4
396	1570	D	18	R	3	no	0	1	5	123	-123	-26.7
396	1570	D	18	R	3	no	41	42	5	123.41	-123.41	-26.6
396	1570	D	18	R	4	yes	2	4	5	123.78	-123.78	-26.7
396	U1570	D	18	R	CC		24	26		124	-124	-26.3138
396	1570	D	19	R	1	no	10	11	5	125	-125	-26.5
396	1570	D	19	R	1	no	90	91	5	125.8	-125.8	-26.4
396	1570	D	19	R	2	no	22	23	5	126.55	-126.55	-26.5
396	1570	D	19	R	2	no	67	68	5	127	-127	-27
396	1570	D	19	R	3	no	1	2	5	127.4	-127.4	-27.2
396	1570	D	19	R	3	no	42	43	5	127.81	-127.81	-26.8
396	1570	D	19	R	4	yes	7	9	5	127.97	-127.97	-26.8
396	U1570	D	19	R	CC		25	27		128.15	-128.15	-26.3608
396	1570	D	20	R	1	no	20	21	5	130	-130	-26.4
396	1570	D	20	R	1	no	60	61	5	130.4	-130.4	-26.4
396	1570	D	20	R	1	no	100	101	5	130.8	-130.8	-26.2
396	1570	D	20	R	1	no	121	122	5	131.01	-131.01	-26
396	1570	D	20	R	2	no	15	17	5	131.22	-131.22	-26.1
396	1570	D	20	R	2	no	73	74	5	131.8	-131.8	-26.3
396	1570	D	20	R	3	no	13	14	5	132	-132	-25.9
396	1570	D	20	R	3	no	53	54	5	132.4	-132.4	-26
396	1570	D	20	R	3	no	70	71	5	132.57	-132.57	-26.1
396	U1570	D	20	R	CC		27	29		133	-133	-27.2452
396	1570	D	21	R	1	no	4	5	5	134.64	-134.64	-25.4
396	1570	D	21	R	1	no	20	21	5	134.8	-134.8	-25.4
396	1570	D	21	R	1	no	59	60	5	135.19	-135.19	-25.5
396	1570	D	21	R	1	no	97	98	5	135.57	-135.57	-25.4
396	1570	D	21	R	2	no	4	6	10	135.81	-135.81	-25.9
396	1570	D	21	R	2	no	23	24	5	136	-136	-25.6
396	1570	D	21	R	2	no	43	44	5	136.2	-136.2	-25.7
396	1570	D	21	R	3	yes	4	5	5	136.4	-136.4	-25.9
396	U1570	D	21	R	CC		15	17		136.51	-136.51	-26.4234
396	1570	D	22	R	1	no	0	1	5	139.4	-139.4	-26.4
396	1570	D	22	R	1	no	40	41	5	139.8	-139.8	-26.1
396	1570	D	22	R	1	no	100	101	5	140.4	-140.4	-26
396	1570	D	22	R	2	no	13	14	5	141	-141	-26.1
396	1570	D	22	R	2	no	70	71	5	141.57	-141.57	-26.1
396	1570	D	22	R	3	no	3	4	5	142.4	-142.4	-25.9
396	1570	D	22	R	3	no	83	84	5	143.2	-143.2	-26
396	1570	D	22	R	4	yes	4	5	5	143.57	-143.57	-26.2
396	U1570	D	22	R	CC		16	18		143.69	-143.69	-26.9063
396	U1570	D	23	R	CC		0	2		144.66	-144.66	-26.6351
396	U1570	D	24	R	CC		0	2		149.79	-149.79	-27.1383
396	1570	D	25	R	1	no	9	10	5	158.99	-158.99	-27.6533
396	U1570	D	27	R	CC		0	4		178.4	-178.4	-27.2747
396	U1570	D	28	R	CC		24	26		192.28	-192.28	-26.524

## Sheet: d13C 1569A
EXPEDITION	SITE	HOLE	CORE	CORE_TYPE	SECTION	TOP_DEPTH	MBSF_TOP	δ13C (‰ vs. VPDB)										x
396	U1569	A	18	R	3	141	170.32	-27.4187		Clipt lab
396	U1569	A	19	R	1	91	176.61	-28.9684		Hawaii
396	U1569	A	20	R	1	141	186.81	-26.9647
396	1569	A	23	R	1	65	215.45	-27.1
396	1569	A	23	R	1	70	215.5	-28
396	1569	A	23	R	2	8	216	-26.8
396	1569	A	23	R	2	55	216.47	-27.8
396	U1569	A	23	R	2	86	216.78	-26.7699
396	1569	A	23	R	3	7	216.95	-27
396	1569	A	23	R	3	59	217.47	-27.4
396	1569	A	24	R	1	37	224.97	-26.4
396	1569	A	24	R	1	87	225.47	-27.6
396	U1569	A	24	R	1	92	225.52	-27.3481
396	1569	A	24	R	2	33	225.95	-27.8
396	1569	A	24	R	2	85	226.47	-27.1
396	1569	A	25	R	1	70	235	-27.1
396	1569	A	25	R	2	11	235.47	-27
396	1569	A	27	R	1	57	254.47	-26.6
396	1569	A	27	R	1	105	254.95	-26.7
396	1569	A	27	R	2	5	255.45	-26.9
396	1569	A	27	R	2	55	255.95	-26.9
396	1569	A	27	R	2	107	256.47	-26.6
396	1569	A	27	R	3	60	257.47	-26.5
396	1569	A	28	R	1	77	264.47	-26.6
396	U1569	A	28	R	1	130	265	-26.8603
396	1569	A	28	R	2	37	265.47	-26.6
396	1569	A	28	R	2	90	266	-26.8
396	1569	A	29	R	1	47	273.97	-26.5
396	1569	A	29	R	1	97	274.47	-26.9
396	U1569	A	29	R	1	122	274.72	-26.8965
396	1569	A	30	R	1	17	283.47	-26.4
396	1569	A	30	R	1	65	283.95	-27
396	1569	A	30	R	1	110	284.4	-26.8
396	1569	A	31	R	1	47	293.57	-26.8
396	1569	A	31	R	1	90	294	-26.5
396	1569	A	32	R	1	3	298.03	-27.1
396	1569	A	32	R	1	47	298.47	-26.4
396	1569	A	32	R	1	95	298.95	-26.8
396	U1569	A	32	R	1	141	299.41	-28.2058
396	1569	A	32	R	2	42	299.93	-27.1
396	1569	A	32	R	3	2	300.47	-27.1
396	1569	A	33	R	1	13	303.03	-27
396	1569	A	33	R	1	55	303.45	-27
396	1569	A	34	R	1	18	307.98	-32.1
396	1569	A	34	R	1	67	308.47	-27.7
396	1569	A	34	R	1	115	308.95	-26.9
396	1569	A	34	R	2	16	309.46	-26.8
396	1569	A	34	R	2	67	309.97	-27.8
396	U1569	A	34	R	2	94	310.24	-26.7831
396	1569	A	35	R	1	24	312.94	-26.1
396	1569	A	35	R	1	77	313.47	-26.5
396	1569	A	35	R	1	124	313.94	-26.7
396	U1569	A	35	R	1	141	314.11	-26.5752
396	1569	A	35	R	2	26	314.47	-26.1
396	1569	A	35	R	2	74	314.95	-26.5
396	1569	A	35	R	2	126	315.47	-26.9
396	U1569	A	35	R	CC	8	315.74	-26.7054
396	1569	A	36	R	1	6	322.56	-26.8
396	1569	A	36	R	1	97	323.47	-26.6
396	1569	A	36	R	2	6	324.05	-26.6
396	1569	A	36	R	2	48	324.47	-26.6
396	1569	A	36	R	2	96	324.95	-26.4
396	U1569	A	36	R	2	139	325.38	-26.1972
396	1569	A	36	R	3	5	325.53	-26.3
396	1569	A	36	R	3	57	326.05	-26.7
396	1569	A	36	R	3	99	326.47	-26.7
396	1569	A	36	R	4	6	327.05	-27.1
396	1569	A	36	R	4	48	327.47	-26.8
396	U1569	A	36	R	CC	7	327.98	-26.052
396	1569	A	37	R	1	22	332.52	-26.7
396	1569	A	37	R	1	65	332.95	-26.8
396	U1569	A	37	R	CC	10	333.2	-25.9671
396	1569	A	38	R	1	37	342.47	-25.6
396	1569	A	38	R	1	137	343.47	-24.8
396	1569	A	38	R	2	31	343.91	-25.7
396	1569	A	38	R	2	87	344.47	-25.4
396	1569	A	38	R	2	138	344.98	-24.6
396	U1569	A	38	R	2	141	345.01	-25.4765
396	1569	A	38	R	3	36	345.47	-24.7
396	1569	A	38	R	3	84	345.95	-24.4
396	1569	A	38	R	3	136	346.47	-25.7
396	1569	A	38	R	4	43	347.04	-25.1
396	1569	A	38	R	5	4	347.5	-25.5
396	U1569	A	38	R	CC	3	347.53	-25.2583
396	1569	A	39	R	1	57	352.47	-25.4
396	U1569	A	39	R	1	91	352.81	-25.4869
396	1569	A	39	R	2	22	353.13	-25.7
396	1569	A	39	R	2	59	353.5	-26.1
396	U1569	A	39	R	CC	16	353.67	-25.5247
396	1569	A	41	R	1	4	371.54	-25.6
396	1569	A	41	R	1	45	371.95	-25.2
396	1569	A	41	R	1	97	372.47	-25.2
396	U1569	A	41	R	CC	5	372.74	-25.3787
396	U1569	A	42	R	1	140	382.7	-25.1745
396	U1569	A	42	R	CC	21	384.23	-25.2838
396	U1569	A	43	R	1	140	392.5	-25.5706
396	U1569	A	44	R	1	140	402.3	0.519243

## Sheet: d13C 1570A
EXP.	SITE	HOLE	CORE	CORE_TYPE	SECTION	TOP_DEPTH	MBSF_TOP	MCD_TOP	δ13C (‰ vs. VPDB)
396	1570	A	14	R	1	50	89	-89	-26.6
396	1570	A	14	R	2	11	90	-90	-26.6
396	1570	A	14	R	2	61	90.5	-90.5	-26.6
396	1570	A	14	R	3	55	91.5	-91.5	-26.5
396	1570	A	15	R	1	10	93.5	-93.5	-27.1
396	1570	A	15	R	1	60	94	-94	-26.8
396	U1570	A	15	R	1	132	94.72	-94.72	-27.07
396	1570	A	15	R	2	18	95	-95	-26.7
396	1570	A	15	R	2	68	95.5	-95.5	-27.2
396	1570	A	16	R	1	80	99	-99	-26.8
396	1570	A	16	R	1	130	99.5	-99.5	-27.1
396	1570	A	16	R	2	37	99.98	-99.98	-26.8
396	1570	A	16	R	2	139	101	-101	-26.9
396	1570	A	16	R	3	42	101.5	-101.5	-26.9
396	1570	A	16	R	3	92	102	-102	-27
396	1570	A	17	R	1	40	103.5	-103.5	-26.9
396	1570	A	17	R	1	90	104	-104	-26.6
396	U1570	A	17	R	1	137	104.47	-104.47	-26.51
396	1570	A	17	R	2	39	104.98	-104.98	-26.8
396	1570	A	17	R	2	91	105.5	-105.5	-26.5
396	1570	A	17	R	3	24	106	-106	-26.4
396	1570	A	18	R	1	10	108	-108	-26.4
396	1570	A	18	R	1	60	108.5	-108.5	-26.7
396	1570	A	18	R	2	19	109.5	-109.5	-26.4
396	1570	A	18	R	2	119	110.5	-110.5	-20.2
396	1570	A	19	R	1	20	113	-113	-26.8
396	1570	A	19	R	1	70	113.5	-113.5	-26.4
396	1570	A	20	R	1	30	118	-118	-26.7
396	1570	A	20	R	1	80	118.5	-118.5	-26.8
396	U1570	A	20	R	1	110	118.8	-118.8	-26.67
396	1570	A	20	R	2	15	119.05	-119.05	-26.8
396	1570	A	20	R	2	111	120.01	-120.01	-26.9
396	1570	A	22	R	1	60	128	-128	-26.8
396	U1570	A	22	R	1	86	128.26	-128.26	-26.58
396	1570	A	22	R	2	14	128.5	-128.5	-26.9
396	1570	A	22	R	2	64	129	-129	-26.5
396	1570	A	23	R	1	20	132.5	-132.5	-27
396	1570	A	23	R	1	120	133.5	-133.5	-27
396	1570	A	23	R	2	22	134	-134	-26.9
396	1570	A	23	R	2	72	134.5	-134.5	-26.7
396	1570	A	24	R	1	40	137.5	-137.5	-27.1
396	1570	A	24	R	1	90	138	-138	-26.9
396	U1570	A	24	R	1	136	138.46	-138.46	-26.814
396	1570	A	24	R	2	44	139.04	-139.04	-27
396	1570	A	24	R	2	92	139.52	-139.52	-27
396	1570	A	25	R	1	0	142	-142	-27.4
396	1570	A	25	R	2	0	143.5	-143.5	-26.7
396	1570	A	25	R	2	52	144.02	-144.02	-26.23
396	U1570	A	27	R	1	131	153.11	-153.11	-26.51
396	1570	A	28	R	2	44	158.55	-158.55	-27.17
396	1570	A	28	R	4	0	160.42	-160.42	-26.61
396	U1570	A	29	R	2	141	164.41	-164.41	-26.09
396	1570	A	30	R	4	0	170.11	-170.11	-26.23
396	U1570	A	31	R	1	140	172.6	-172.6	-26.8088
396	1570	A	31	R	3	0	173.65	-173.65	-26.436
396	1570	A	32	R	3	0	177.77	-177.77	-26.5078
396	1570	A	33	R	2	0	182.33	-182.33	-26.2983
396	U1570	A	34	R	1	140	187.1	-187.1	-26.3524
396	1570	A	34	R	3	0	188.53	-188.53	-26.3083
396	1570	A	35	R	1	66	191.36	-191.36	-26.6398
396	1570	A	35	R	3	0	193.34	-193.34	-26.0064
396	U1570	A	36	R	1	141	196.91	-196.91	-26.2669
396	1570	A	36	R	3	16	198.5	-198.5	-26.0676

## Sheet: d13C 1568A
Exp	Site	Hole	Core	Type	Sect	Top offset	Bottom offset	Depth CSF-A (m)	Depth CSF-B (m)	wt% C	δ13CVPDB (‰)	Author
						cm	cm	m	m		mg
396	U1568	A	1	H	2	146	151	-2.96	2.96	0.632311	-24.1572	Berndt et al., 2023
396	U1568	A	2	H	2	145	150	-6.85	6.754	0.77115	-26.3072	Berndt et al., 2023
396	U1568	A	2	H	4	145	150	-9.85	9.656	0.299061	-25.8154	Berndt et al., 2023
396	U1568	A	2	H	6	145	150	-12.86	12.568	0.485037	-24.3765	Berndt et al., 2023
396	U1568	A	3	H	2	144	149	-16.34	16.256	0.254384	-25.3823	Berndt et al., 2023
396	U1568	A	3	H	4	145	150	-19.34	19.171	0.343777	-25.7672	Berndt et al., 2023
396	U1568	A	3	H	6	145	150	-22.35	22.095	0.395603	-26.0741	Berndt et al., 2023
396	U1568	A	4	H	2	146	151	-25.86	25.729	0.831217	-25.0683	Berndt et al., 2023
396	U1568	A	4	H	4	145	150	-28.87	28.606	0.362739	-24.9201	Berndt et al., 2023
396	U1568	A	4	H	6	145	150	-31.88	31.482	0.182212	-25.9407	Berndt et al., 2023
396	U1568	A	5	H	2	140	150	-35.3	35.18	0.163261	-25.1442	Berndt et al., 2023
396	U1568	A	5	H	4	138	148	-38.28	38.037	0.115159	-28.1244	Berndt et al., 2023
396	U1568	A	5	H	6	140	150	-41.29	40.922	0.105482	-28.3607	Berndt et al., 2023
396	U1568	A	6	H	2	140	150	-44.81	44.785	0.0716267	-27.9267	Berndt et al., 2023
396	U1568	A	6	H	4	140	150	-47.82	47.77	0.0609611	-27.6698	Berndt et al., 2023
396	U1568	A	6	H	6	130	140	-50.74	50.666	0.0559747	-26.4474	Berndt et al., 2023
396	U1568	A	7	H	CC	25	30	-51.65	51.65	0.137387	-27.2529	Berndt et al., 2023
396	U1568	A	8	X	2	140	150	-54.6	54.6	0.0725081	-27.7302	Berndt et al., 2023
396	U1568	A	8	X	CC	32	37	-57.08	57.08	0.0812572	-27.4879	Berndt et al., 2023
396	U1568	A	9	X	CC	34	39	-63.13	62.754	0.4695	-27.3152	Berndt et al., 2023
396	U1568	A	10	X	2	139	149	-65.69	65.476	0.358155	-27.2482	Berndt et al., 2023
396	U1568	A	11	X	2	140	150	-70.7	70.7	0.423988	-27.2985	Berndt et al., 2023
396	U1568	A	12	X	2	140	150	-75.29	75.29	0.855746	-27.554	Berndt et al., 2023
396	U1568	A	13	X	3	141	151	-81.81	81.81	0.398054	-27.3561	Berndt et al., 2023
396	U1568	A	14	X	3	139	149	-91.59	91.59	0.600809	-27.5914	Berndt et al., 2023
396	U1568	A	15	X	3	140	150	-101.4	101.4	0.567898	-27.4285	Berndt et al., 2023
396	U1568	A	16	X	1	25	26	-107.05	107.05	0.365267	-27	THIS STUDY
396	U1568	A	16	X	1	125	126	-108.05	108.05	0.131933	-26.6	THIS STUDY
396	U1568	A	16	X	2	75	76	-109.05	109.05	0.375405	-27.3	THIS STUDY
396	U1568	A	16	X	3	25	26	-110.05	110.05	0.734115	-28.5	THIS STUDY
396	U1568	A	16	X	3	125	126	-111.05	111.05	0.363917	-27.3	THIS STUDY
396	U1568	A	16	X	3	140	150	-111.2	111.2	0.330319	-26.8457	Berndt et al., 2023
396	U1568	A	16	X	4	25	26	-111.55	111.55	0.369134	-27	THIS STUDY
396	U1568	A	16	X	5	13	14	-112.55	112.55	0.432669	-27.4	THIS STUDY
396	U1568	A	17	X	1	45	46	-117.05	117.05	0.278587	-28	THIS STUDY
396	U1568	A	17	X	1	95	96	-117.55	117.55	0.985632	-28.6	THIS STUDY
396	U1568	A	17	X	1	145	146	-118.05	118.05	0.729112	-27.8	THIS STUDY
396	U1568	A	17	X	2	46	47	-118.55	118.55	0.304746	-27.6	THIS STUDY
396	U1568	A	17	X	2	82	83	-118.91	118.91	0.895439	-27.9	THIS STUDY
396	U1568	A	17	X	2	96	97	-119.05	119.05	0.754857	-27.5	THIS STUDY
396	U1568	A	17	X	2	146	147	-119.55	119.55	0.975245	-28.3	THIS STUDY
396	U1568	A	17	X	3	45	46	-120.05	120.05	1.07122	-27.8	THIS STUDY
396	U1568	A	17	X	3	95	96	-120.55	120.55	1.15386	-27.6	THIS STUDY
396	U1568	A	17	X	3	141	151	-121.01	120.975	0.999793	-27.1741	Berndt et al., 2023
396	U1568	A	17	X	4	44	45	-121.55	121.55	1.07996	-27.7	THIS STUDY
396	U1568	A	17	X	4	94	95	-122.05	122.05	0.161266	-27.7	THIS STUDY
396	U1568	A	17	X	4	144	145	-122.55	122.55	0.872395	-27.5	THIS STUDY
396	U1568	A	17	X	5	43	44	-123.05	123.05	0.976609	-27.7	THIS STUDY	Volcanic ash layer
396	U1568	A	17	X	5	93	94	-123.55	123.55	0.713481	-27.6	THIS STUDY
396	U1568	A	17	X	5	143	144	-124.05	124.05	0.873189	-27.8	THIS STUDY
396	U1568	A	17	X	6	43	44	-124.55	124.55	0.815564	-27.7	THIS STUDY
396	U1568	A	17	X	6	93	94	-125.05	125.05	0.846659	-27.5	THIS STUDY
396	U1568	A	17	X	6	143	144	-125.55	125.55	0.980385	-27.5	THIS STUDY
396	U1568	A	17	X	7	43	44	-126.05	126.05	0.978239	-27.9	THIS STUDY
396	U1568	A	17	X	CC	34	39	-126.43	126.35	0.842076	-27.4483	Berndt et al., 2023
396	U1568	A	18	X	1	15	16	-126.55	126.55	0.661402	-27.7	THIS STUDY
396	U1568	A	18	X	1	65	66	-127.05	127.05	0.9039	-28	THIS STUDY
396	U1568	A	18	X	1	115	116	-127.55	127.55	0.995044	-27.5	THIS STUDY
396	U1568	A	18	X	2	14	15	-128.05	128.05	1.17947	-27.9	THIS STUDY
396	U1568	A	18	X	2	64	65	-128.55	128.55	1.05212	-27.8	THIS STUDY
396	U1568	A	18	X	2	114	115	-129.05	129.05	1.1713	-28.4	THIS STUDY
396	U1568	A	18	X	3	64	65	-130.05	130.05	1.40524	-28.6	THIS STUDY
396	U1568	A	18	X	3	114	115	-130.55	130.55	1.117	-28.6	THIS STUDY
396	U1568	A	18	X	3	140	150	-130.81	130.81	1.10462	-28.1123	Berndt et al., 2023
396	U1568	A	18	X	4	14	15	-131.05	131.05	0.754397	-28.2	THIS STUDY
396	U1568	A	18	X	4	64	65	-131.55	131.55	1.53437	-28.6	THIS STUDY
396	U1568	A	18	X	4	114	115	-132.05	132.05	0.635344	-28.7	THIS STUDY
396	U1568	A	18	X	5	13	14	-132.55	132.55	1.74674	-31.2	THIS STUDY
396	U1568	A	18	X	5	113	114	-133.55	133.55	1.03089	-26.1	THIS STUDY
396	U1568	A	18	X	CC	28	33	-133.92	133.92	0.66397	-25.8026	Berndt et al., 2023
396	U1568	A	19	X	2	140	150	-139	139	0.582926	-25.4681	Berndt et al., 2023
396	U1568	A	20	X	2	140	150	-148.7	148.7	0.354286	-25.2469	Berndt et al., 2023
396	U1568	A	21	X	1	141	151	-156.91	156.91	0.279873	-25.9298	Berndt et al., 2023
396	U1568	A	23	X	1	139	149	-170.59	170.59	0.411362	-25.7053	Berndt et al., 2023
396	U1568	A	25	X	1	129	139	-180.99	180.99	0.454177	-26.1915	Berndt et al., 2023
396	U1568	A	27	X	2	140	150	-192.41	192.244	0.517959	-25.7768	Berndt et al., 2023
396	U1568	A	16	X	1	25	26	-107.05	107.05	0.365267	-27	THIS STUDY
396	U1568	A	16	X	1	125	126	-108.05	108.05	0.131933	-26.6	THIS STUDY
396	U1568	A	16	X	2	75	76	-109.05	109.05	0.375405	-27.3	THIS STUDY
396	U1568	A	16	X	3	25	26	-110.05	110.05	0.734115	-28.5	THIS STUDY
396	U1568	A	16	X	3	125	126	-111.05	111.05	0.363917	-27.3	THIS STUDY
396	U1568	A	16	X	4	25	26	-111.55	111.55	0.369134	-27	THIS STUDY
396	U1568	A	16	X	5	13	14	-112.55	112.55	0.432669	-27.4	THIS STUDY
396	U1568	A	17	X	1	45	46	-117.05	117.05	0.278587	-28	THIS STUDY
396	U1568	A	17	X	1	95	96	-117.55	117.55	0.985632	-28.6	THIS STUDY
396	U1568	A	17	X	1	145	146	-118.05	118.05	0.729112	-27.8	THIS STUDY
396	U1568	A	17	X	2	46	47	-118.55	118.55	0.304746	-27.6	THIS STUDY
396	U1568	A	17	X	2	82	83	-118.91	118.91	0.895439	-27.9	THIS STUDY
396	U1568	A	17	X	2	96	97	-119.05	119.05	0.754857	-27.5	THIS STUDY
396	U1568	A	17	X	2	146	147	-119.55	119.55	0.975245	-28.3	THIS STUDY
396	U1568	A	17	X	3	45	46	-120.05	120.05	1.07122	-27.8	THIS STUDY
396	U1568	A	17	X	3	95	96	-120.55	120.55	1.15386	-27.6	THIS STUDY
396	U1568	A	17	X	4	44	45	-121.55	121.55	1.07996	-27.7	THIS STUDY
396	U1568	A	17	X	4	94	95	-122.05	122.05	0.161266	-27.7	THIS STUDY
396	U1568	A	17	X	4	144	145	-122.55	122.55	0.872395	-27.5	THIS STUDY
396	U1568	A	17	X	5	43	44	-123.05	123.05	0.976609	-27.7	THIS STUDY
396	U1568	A	17	X	5	93	94	-123.55	123.55	0.713481	-27.6	THIS STUDY
396	U1568	A	17	X	5	143	144	-124.05	124.05	0.873189	-27.8	THIS STUDY
396	U1568	A	17	X	6	43	44	-124.55	124.55	0.815564	-27.7	THIS STUDY
396	U1568	A	17	X	6	93	94	-125.05	125.05	0.846659	-27.5	THIS STUDY
396	U1568	A	17	X	6	143	144	-125.55	125.55	0.980385	-27.5	THIS STUDY
396	U1568	A	17	X	7	43	44	-126.05	126.05	0.978239	-27.9	THIS STUDY
396	U1568	A	18	X	1	15	16	-126.55	126.55	0.661402	-27.7	THIS STUDY
396	U1568	A	18	X	1	65	66	-127.05	127.05	0.9039	-28	THIS STUDY
396	U1568	A	18	X	1	115	116	-127.55	127.55	0.995044	-27.5	THIS STUDY
396	U1568	A	18	X	2	14	15	-128.05	128.05	1.17947	-27.9	THIS STUDY
396	U1568	A	18	X	2	64	65	-128.55	128.55	1.05212	-27.8	THIS STUDY
396	U1568	A	18	X	2	114	115	-129.05	129.05	1.1713	-28.4	THIS STUDY
396	U1568	A	18	X	3	64	65	-130.05	130.05	1.40524	-28.6	THIS STUDY
396	U1568	A	18	X	3	114	115	-130.55	130.55	1.117	-28.6	THIS STUDY
396	U1568	A	18	X	4	14	15	-131.05	131.05	0.754397	-28.2	THIS STUDY
396	U1568	A	18	X	4	64	65	-131.55	131.55	1.53437	-28.6	THIS STUDY
396	U1568	A	18	X	4	114	115	-132.05	132.05	0.635344	-28.7	THIS STUDY
396	U1568	A	18	X	5	13	14	-132.55	132.55	1.74674	-31.2	THIS STUDY
396	U1568	A	18	X	5	113	114	-133.55	133.55	1.03089	-26.1	THIS STUDY

## Sheet: d13C 1567A
Exp	Site	Hole	Core	Type	Sect	A/W	Top offset on section (cm)	Bot offset on section (cm)	Top depth CSF-A (m)	wt% C	δ13CVPDB (‰)	Author																x
											mg
396	U1567	A	1	H	2		145	150	-2.95	0.525312	-24.7462	Berndt et al., 2023
396	U1567	A	1	H	3		145	150	-4.45	0.457878	-24.7462	Berndt et al., 2023
396	U1567	A	2	H	2		145	150	-8.35	0.429508	-24.9889	Berndt et al., 2023
396	U1567	A	2	H	4		145	150	-11.36	0.502118	-24.5313	Berndt et al., 2023
396	U1567	A	2	H	6		145	150	-14.37	0.393947	-25.5284	Berndt et al., 2023
396	U1567	A	3	H	2		145	150	-17.85	0.656759	-25.6273	Berndt et al., 2023
396	U1567	A	3	H	4		145	150	-20.86	0.303053	-25.1273	Berndt et al., 2023
396	U1567	A	3	H	6		145	150	-23.86	0.19009	-26.1345	Berndt et al., 2023
396	U1567	A	4	H	2		145	150	-27.36	0.225269	-24.9222	Berndt et al., 2023
396	U1567	A	4	H	6	W	114	115	-33.06	0.173817	-23.9637	Berndt et al., 2023
396	U1567	A	4	H	6	W	138	139	-33.3	0.19872	-29.0237	Berndt et al., 2023
396	U1567	A	4	H	6		145	150	-33.37	0.200404	-28.8238	Berndt et al., 2023
396	U1567	A	4	H	7		12	13	-33.54	0.208522	-28.431	Berndt et al., 2023
396	U1567	A	5	H	2		140	150	-36.81	0.158721	-27.9294	Berndt et al., 2023
396	U1567	A	5	H	4		140	150	-39.81	0.0715765	-26.637	Berndt et al., 2023
396	U1567	A	5	H	6		112	122	-42.53	0.115718	-27.5493	Berndt et al., 2023
396	U1567	A	6	H	2		140	150	-46.3	0.135419	-25.6998	Berndt et al., 2023
396	U1567	A	6	H	4		141	151	-49.33	1.12392	-25.4295	Berndt et al., 2023
396	U1567	A	6	H	6		140	150	-52.36	1.33554	-26.0407	Berndt et al., 2023
396	U1567	A	7	F	1	W	65	66	-53.55	0.0915683	-28.1	THIS STUDY	ASH
396	U1567	A	7	F	1	W	70	75	-53.6	0.057569	-27.7	THIS STUDY	ASH
396	U1567	A	7	F	1	W	80	82	-53.7	1.91158	-25.8796	Berndt et al., 2023
396	U1567	A	10	X	1	W	22	23	-64.72	1.11193	-25.8	THIS STUDY
396	U1567	A	10	X	1	W	55	56	-65.05	1.29559	-25.6	THIS STUDY
396	U1567	A	10	X	1	W	105	106	-65.55	1.55813	-25.8	THIS STUDY
396	U1567	A	10	X	2	W	54	55	-66.55	1.14288	-25.9	THIS STUDY
396	U1567	A	10	X	2	W	105	196	-67.05	0.948469	-25.6	THIS STUDY
396	U1567	A	10	X	2		140	150	-67.4	0.530988	-25.4488	Berndt et al., 2023
396	U1567	A	10	X	3	W	5	6	-67.55	1.09366	-25.7	THIS STUDY
396	U1567	A	10	X	3	W	54	55	-68.05	1.04193	-25.9	THIS STUDY
396	U1567	A	10	X	4	W	4	5	-69.05	1.72436	-25.6	THIS STUDY
396	U1567	A	10	X	4	W	54	55	-69.55	1.37442	-26	THIS STUDY
396	U1567	A	10	X	4	W	104	105	-70.05	1.35484	-26.2	THIS STUDY
396	U1567	A	11	X	3		140	150	-73.8	0.500904	-25.1431	Berndt et al., 2023
396	U1567	A	12	X	3		140	150	-83.6	0.494053	-25.5316	Berndt et al., 2023
396	U1567	A	13	X	3		140	150	-93.31	0.523811	-26.0618	Berndt et al., 2023
396	U1567	A	14	X	3		141	151	-103.02	0.451325	-25.6033	Berndt et al., 2023
396	U1567	A	15	X	2		134	144	-111.13	0.374712	-25.5419	Berndt et al., 2023
396	U1567	A	16	X	3		140	150	-122.5	0.414028	-25.5953	Berndt et al., 2023
396	U1567	A	17	X	3		140	150	-132.2	0.40137	-25.6462	Berndt et al., 2023
396	U1567	A	18	X	3		140	150	-141.9	0.469928	-25.2965	Berndt et al., 2023
396	U1567	A	19	X	3		140	150	-151.6	0.376725	-25.4522	Berndt et al., 2023
396	U1567	A	20	X	3		140	150	-161.41	0.524539	-26.1052	Berndt et al., 2023
396	U1567	A	21	X	3		140	150	-171.09	0.366712	-25.7528	Berndt et al., 2023
396	U1567	A	22	X	3		140	150	-180.8	0.37891	-25.416	Berndt et al., 2023
396	U1567	A	23	X	3		140	150	-190.6	0.475413	-25.9966	Berndt et al., 2023
396	U1567	A	7	F	1	W	65	66	-53.55	0.0915683	-28.1	THIS STUDY
396	U1567	A	7	F	1	W	70	75	-53.6	0.057569	-27.7	THIS STUDY
396	U1567	A	10	X	1	W	22	23	-64.72	1.11193	-25.8	THIS STUDY
396	U1567	A	10	X	1	W	55	56	-65.05	1.29559	-25.6	THIS STUDY
396	U1567	A	10	X	1	W	105	106	-65.55	1.55813	-25.8	THIS STUDY
396	U1567	A	10	X	2	W	54	55	-66.55	1.14288	-25.9	THIS STUDY
396	U1567	A	10	X	2	W	105	196	-67.05	0.948469	-25.6	THIS STUDY
396	U1567	A	10	X	3	W	5	6	-67.55	1.09366	-25.7	THIS STUDY
396	U1567	A	10	X	3	W	54	55	-68.05	1.04193	-25.9	THIS STUDY
396	U1567	A	10	X	4	W	4	5	-69.05	1.72436	-25.6	THIS STUDY
396	U1567	A	10	X	4	W	54	55	-69.55	1.37442	-26	THIS STUDY
396	U1567	A	10	X	4	W	104	105	-70.05	1.35484	-26.2	THIS STUDY
